# Supplementary material for: Quantitative Trait Loci for Heat Stress Tolerance in Brassica rapa L. Are Distributed across the Genome and Occur in Diverse Genetic Groups, Flowering Phenologies and Morphotypes
Source: MDPI journal article supplement (doi:10.3390/genes13020296), 2022-02-03

**Figure S1.** Comparison of six models for variation of observed  $p$  value (x-axes) against the expected  $p$  values (y-axes) using general linear model (GLM) and mixed linear model (MLM).

## GLM: QQ plots

### (i) Naïve model (control)

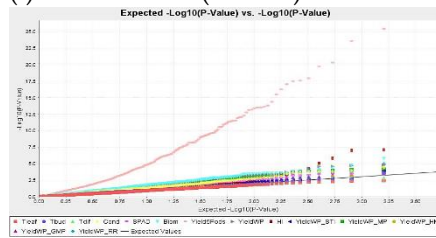

### Naïve model (heat stress)

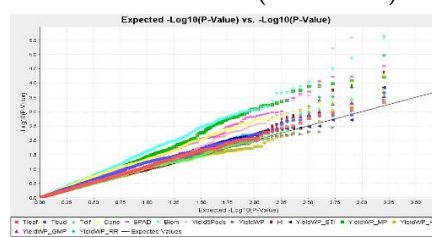

### (ii) Q model (control)

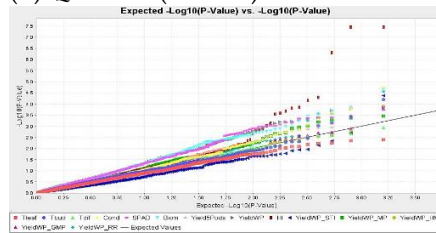

### Q model (heat stress)

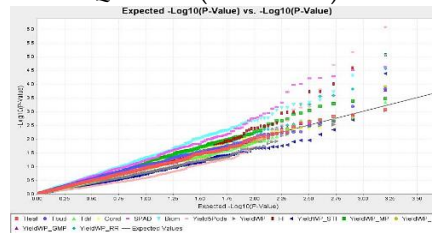

### (iii) P model (control)

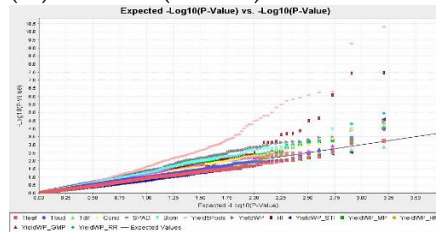

### P model (heat stress)

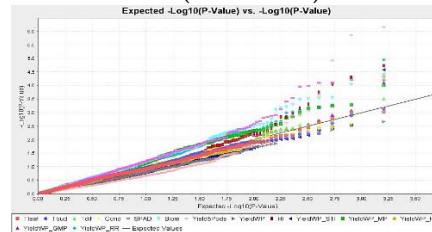

## MLM: QQ plots

### (iv) K model (control)

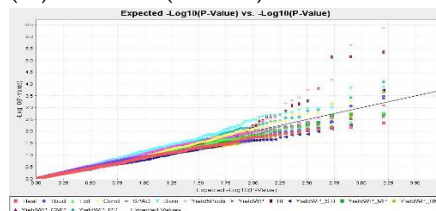

### K model (heat stress)

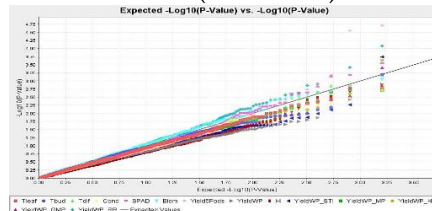

### (v) Q+K model (control)

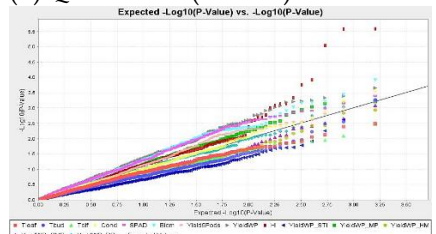

### Q+K model (heat stress)

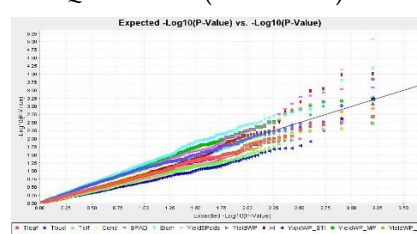

### (vi) P+K model (control)

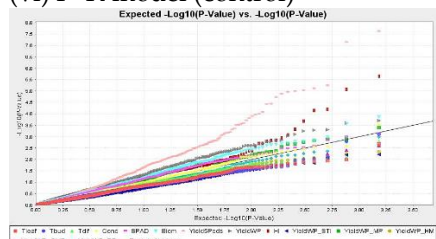

### P+K model (heat stress)

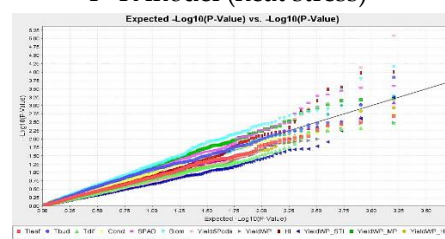

Supplement: s1 [file s1]
