# Supplementary material for: Quantitative Trait Loci for Heat Stress Tolerance in Brassica rapa L. Are Distributed across the Genome and Occur in Diverse Genetic Groups, Flowering Phenologies and Morphotypes
Source: Genes (Basel). 2022 Feb 3;13(2):296. doi: 10.3390/genes13020296 (PMC8871826; doi:10.3390/genes13020296)
Supplement: Supplementary file 1 [file genes-13-00296-s001.zip › 2022_0125 Supplementary Tables S1-S3.xlsx]

## Sheet: Table S1
Table S1. List of 217 Brassica rapa accessions used in this study. The sub-population is based on the structure analysis; Country of origin is based on the country of primary collection recorded; Habitat is based on the requirements of cold treatment and days to flowering in the screen-house. DTF is the number of days from seed sowing to first open flower after 4 weeks of cold treatment (6°C at d…
Code	Accession Name	Accession No	Genotype	DTF	Heat Tolerance Phenotyping Group	SNP Genotyping Group	SSR Genotyping Group	Country of Origin	Source	Seed Color	SI or SC	Flowering type	Morphotypes	Regions	Old Code	Domesitication	Taxon
R001	PI 207465	ATC90218	g1	52	S1	A2	G3	Afghanistan	ATFCC	Brown	SI	Spring	Oilseed	South Asia	YG049		Brassica rapa
R002	HRI 6699	ATC95330	g4	57	S1	B2	G1	Algeria	ATFCC	Brown	SC	Semi-Winter	Rooty	West Asia-North Africa	YG050	wild type	Brassica rapa ssp. sylvestris
R003	Mauri Ghat	UWA01	g5			A2	G3	Australia	UWA	Yellow	SI	Spring	Oilseed	Australia	YG026		Brassica rapa
R004	New Paka	UWA02	g6	46	S1	A2	G3	Australia	UWA	Brown	SI	Spring	Oilseed	Australia	YG051		Brassica rapa
R005	JUMBUCK	ATC90196	g8	65	S1	B2	O2	Australia	ATFCC	Yellow	SC	Semi-Winter	Oilseed		An013		Brassica rapa
R006	HRI 6175	ATC95339	g17			A1	G3	Austria	ATFCC	Brown	SI	Winter	Leafy	Europe	YG027		Brassica rapa ssp. pekinensis
R007	Somali Sarisa	ATC95292	g18	58	S1	A2	G3	Bangladesh	ATFCC	Yellow	SC	Spring	Oilseed	South Asia	YG055		Brassica rapa
R008	Ronde Witte-Dries 3	ATC95205	g19	80		B2	G1	Belgium	ATFCC	Brown	SC	Winter	Rooty	Europe	YG028		Brassica rapa
R009	Leielander Waasmunster	ATC95206	g20	65		B2	G1	Belgium	ATFCC	Brown	SI	Winter	Rooty	Europe	YG056		Brassica rapa
R010	PI 324507	ATC90223	g21	68	S1	A2	G3	Brazil	ATFCC	Brown	SI	Unknown	Oilseed	America	YG098		Brassica rapa
R011	CANDLE	ATC90140	g22			B2	G1	Canada	ATFCC	Brown	SC	Spring	Oilseed	America	YG057		Brassica rapa
R012	yellow sarson	111	g26			A2	G3	Germany	NPZ	Yellow	SC	Spring	Oilseed	Europe	YG029		Brassica rapa ssp. trilocularis
R013	REWARD	ATC91213	g27	60	S1	B2	G1	Canada	ATFCC	Yellow	SI	Spring	Oilseed	America	YG030		Brassica rapa ssp. trilocularis
R014	HYSYN 110	ATC91214	g28	57	T1	B2	G1	Canada	ATFCC	Brown	SI	Semi-Winter	Oilseed	America	YG058		Brassica rapa
R015	HYSYN 111	ATC91215	g29	58	T1	B2	OL	Canada	ATFCC	Brown	SC	Spring	Oilseed		An018		Brassica rapa
R016	MARERIUE	ATC91216	g30			B2	G1	Canada	ATFCC	Brown	SI	Semi-Winter	Oilseed	America	YG031		Brassica rapa
R017	Candle	ATC95293	g36	67	S1	B2	G1	Canada	ATFCC	Brown	SI	Spring	Oilseed	America	YG032		Brassica rapa
R018	Ningqiang Cangshe	S1121	g37			A1	G2	China	HAU	Black	SI	Semi-Winter	Oilseed	East Asia	YG001		Brassica rapa ssp. oleifera
R019	Guangzhong Manjing	S1122	g38	56	S1	A1	G2	China	HAU	Brown	SI	Semi-Winter	Leafy	East Asia	YG002		Brassica rapa ssp. chinensis
R020	Guang You 1	S1123	g39			A1	G2	China	HAU	Brown	SI	Semi-Winter	Leafy	East Asia	YG003		Brassica rapa ssp. chinensis
R021	Guang You 3	S1124	g40			A1	G2	China	HAU	Brown	SI	Semi-Winter	Oilseed	East Asia	YG004		Brassica rapa ssp. oleifera
R022	Yan You 2	S1125	g41		T1	A1	G2	China	HAU	Black	SI	Semi-Winter	Oilseed	East Asia	YG005		Brassica rapa ssp. oleifera
R023	Yongchang Spring	S1132	g42	60	S1	A1	G3	China	HAU	Brown	SI	Semi-Winter	Oilseed	East Asia	YG006		Brassica rapa ssp. oleifera
R024	Yongdeng Xiaoyoucai	S1133	g43		T1	A1	G2	China	HAU	Brown	SC	Semi-Winter	Oilseed	East Asia	YG007		Brassica rapa ssp. oleifera
R025	Hao You 5	S1134	g44	69	T1	A1	G3	China	HAU	Brown	SC	Semi-Winter	Oilseed	East Asia	YG008		Brassica rapa ssp. oleifera
R026	Hao You 11	S1135	g45			A1	G3	China	HAU	Brown	SI	Semi-Winter	Oilseed	East Asia	YG009		Brassica rapa ssp. oleifera
R027	80326	S1136	g46			A1	G3	China	HAU	Brown	SC	Semi-Winter	Oilseed	East Asia	YG010		Brassica rapa ssp. oleifera
R028	Xishui Bai	S1079	g47	60	S1	A1	G2	China	HAU	Brown	SI	Spring	Oilseed	East Asia	YG011		Brassica rapa ssp. chinensis
R029	Aijiao Huang	HAU 01	g48	70	T1	A1	G3	China	HAU	Brown	SI	Semi-Winter	Leafy	East Asia	YG012		Brassica rapa ssp. chinensis
R030	Da Huang	HAU 02	g49			A2	G3	China	HAU	Yellow	SI	Semi-Winter	Oilseed	East Asia	YG013		Brassica rapa ssp. oleifera
R031	Qing You 241	HAU 03	g50	62	T1	A1	G2	China	HAU	Brown	SI	Spring	Oilseed	East Asia	YG014		Brassica rapa
R032	Qinghai Hubian Xiaoyoucai	HAU 04	g51	48	T1	A1	G3	China	HAU	Brown	SI	Spring	Oilseed	East Asia	YG015		Brassica rapa ssp. oleifera
R033	PIORBAI	ATC95187	g56	61	S1	A1	G3	China	ATFCC	Brown	SC	Semi-Winter	Leafy	East Asia	YG018		Brassica rapa ssp. chinensis
R034	K-109	ATC95188	g57			A1	G3	China	ATFCC	Black	SC	Semi-Winter	Leafy	East Asia	YG019		Brassica rapa ssp. pekinensis
R035	K-123	ATC95190	g58	63	S1	A1	G3	China	ATFCC	Brown	SI	Semi-Winter	Leafy	East Asia	YG020		Brassica rapa ssp. pekinensis
R036	CGN07187	ATC95295	g59	63	T1	A1	G3	China	ATFCC	Brown	SI	Semi-Winter	Oilseed	East Asia	YG021		Brassica rapa ssp. pekinensis
R037	Tientsin	ATC95302	g60	60	S1	A1	G3	China	ATFCC	Brown	SC	Semi-Winter	Leafy	East Asia	YG022		Brassica rapa ssp. chinensis
R038	Xiao Qing Kou	ATC95303	g61	62	T1	A1	G3	China	ATFCC	Brown	SI	Semi-Winter	Leafy	East Asia	YG023		Brassica rapa ssp. pekinensis
R039	BRA 981 / 01	ATC95360	g67	60	S1	A1	G3	China	ATFCC	Brown	SI	Semi-Winter	Leafy	East Asia	YG024		Brassica rapa ssp. pekinensis
R040	Balady	ATC95214	g71	52	S1	B1	G3	Egypt	ATFCC	Brown	SI	Semi-Winter	Rooty	West Asia-North Africa	YG033		Brassica rapa
R041	CGN 7221	121	g72	51		A2	G3	Germany	NPZ	Black	SC	Semi-Winter	Oilseed	Europe	YG034		Brassica rapa
R042	VALTTI	ATC90020	g74			B2	G1	Finland	ATFCC	Yellow	SC	Semi-Winter	Oilseed	Europe	YG060		Brassica rapa
R043	Yu Qian Tu Zhong	7F062	D14	59	T1	A1	G2	China	NPZ	Brown	SC	Spring	Leafy	East Asia	YG145		Brassica rapa
R044	Rova Svedjerova	ATC95235	g76	55	S1	B1	G1	Finland	ATFCC	Brown	SI	Winter	Rooty	Europe	YG099		Brassica rapa ssp. rapa
R045	GOZEKI-LATE	ATC95194	g133	79	S1	A1	G3	Japan	ATFCC	Black	SI	Semi-Winter	Leafy	East Asia	YG063		Brassica rapa ssp. nipposinica
R046	Kashin Hakusai	ATC95363	g136			A1	G3	Japan	ATFCC	Brown	SI	Unknown	Leafy	East Asia	YG066		Brassica rapa ssp. pekinensis
R047	Echengbaiyoucai	S1379	g191	62	T1	A1	G2	China	HAU	Brown	SC	Semi-Winter	Leafy	East Asia	YG110		Brassica rapa var. oleifera
R048	Huanggang Baiyoucai	S1378	g190			A1	G2	China	HAU	Brown	SI	Semi-Winter	Oilseed	East Asia	YG109		Brassica rapa var. oleifera
R049	66-197-3	ATC92240	g102			A2	G3	India	ATFCC	Yellow	SC	Spring	Oilseed	South Asia	YG038		Brassica rapa ssp. trilocularis
R050	289913	CR2468	y36	58	S1	A2	G1	France	IPK	Brown	SI	Spring	Oilseed	Europe	YG126	wild type	Brassica rapa subsp. oleifera
R051	289802	CR 2357	y33	54	T1	B1	O2	Portugal	IPK	Brown	SC	Spring	Oilseed		An157		Brassica rapa subsp. oleifera
R052	289763	CR 2318	y29	59	S1	B1	Leafy type	Italy	IPK	Brown	SI	Spring	Oilseed		An154		Brassica rapa subsp. oleifera
R053	289778	CR 2333	y30	54	S2	A2	O2	Italy	IPK	Brown	SC	Semi-Winter	Oilseed		An155		Brassica rapa subsp. oleifera
R054	289799	CR 2354	y31	57	S2	A2	O2	Georgia	IPK	Brown	SI	Semi-Winter	Oilseed		An156		Brassica rapa subsp. oleifera
R055	289756		y28	54	S1	A2		Turkey	IPK	Brown		Spring	Oilseed		NA		Brassica rapa
R056	290272	CR 2870	y42	72		A1	O2	Germany	IPK	Brown	SI	Winter	Leafy		An162		Brassica rapa subsp. oleifera
R057	289744	CR2299	y26			B1	G1	Columbia	IPK	Black	SC	Semi-Winter	Oilseed	America	YG121		Brassica rapa subsp. oleifera
R058	CGN07222	ATC95298	g159	58	T1	A2	G3	Pakistan	ATFCC	Brown	SI	Semi-Winter	Leafy	South Asia	YG081		Brassica rapa ssp. pekinensis
R059	CGN 7222	ATC95211	g157	56	T1	A2	G3	Pakistan	ATFCC	Brown	SC	Spring	Leafy	South Asia	YG080		Brassica rapa ssp. pekinensis
R060	Foll' Elite E	ATC95248	g155			B2	G1	Norway	ATFCC	Brown	SI	Winter	Rooty	Europe	YG078		Brassica rapa
R061	Målselvnepe Åsvejen Stamme	ATC95237	g152			B1	G1	Norway	ATFCC	Brown	SI	Winter	Rooty	Europe	YG075		Brassica rapa ssp. rapa
R062	KATMANDU CL-1	ATC92179	g151			A2	G3	Nepal	ATFCC	Yellow	SC	Spring	Oilseed	South Asia	YG074		Brassica rapa
R063	KATMANDU CL-7	ATC92138	g145	56	S1	A2	O1	Nepal	ATFCC	Brown	SC	Semi-Winter	Oilseed		An023		Brassica rapa
R064	635767	CR 3317	y50	57	S1	B1	O2	Italy	IPK	Brown	SI	Spring	Oilseed		An170		Brassica rapa subsp. oleifera
R065	289745	CR2300	y27			B2	G1	Colombia	IPK	Brown	SI	Spring	Oilseed	America	YG122	wild type	Brassica rapa subsp. oleifera
R066	289800	CR2355	y32			B1	G1	UK	IPK	Brown	SC	Spring	Oilseed	Europe	YG123	wild type	Brassica rapa subsp. oleifera
R067	Xia Shi Huang Zi	7F059	D13	61	S2	A1	G2	China	NPZ	Brown	SC	Semi-Winter	Leafy	East Asia	YG144		Brassica rapa
R068	Mestnaya	ATC95185	g137	62	S1	B2	G3	Kazakhstan	ATFCC	Brown	SI	Semi-Winter	Leafy	Central Asia	YG067		Brassica rapa ssp. pekinensis
R069	DUNGANSKAYA	ATC95192	g138	65	S1	A1	G3	Kazakhstan	ATFCC	Brown	SI	Winter	Leafy	Central Asia	YG068		Brassica rapa ssp. pekinensis
R070	BRA 1297/01	ATC95366	g139	63	S2	A1	G2	North Korea	ATFCC	Brown	SI	Semi-Winter	Leafy	East Asia	YG102		Brassica rapa ssp. pekinensis
R071	Rova Svedjerova	ATC95233	b6-2			B1	Root type	Norway	ATFCC	Brown	SI	Winter	Rooty		An110		Brassica rapa subsp. rapa
R072	290276	CR 2874	y44	56	S1	A1	O2	Germany	IPK	Brown	SI	Semi-Winter	Oilseed		An164		Brassica rapa subsp. oleifera
R073	Y239 free cross	7F013	D5	61	S1	A1	G2	China	NPZ	Brown	SI	Spring	Leafy	East Asia	YG136		Brassica rapa
R074	Suzhou Zangcai	S1175	g183			A1	G3	China	HAU	Brown	SC	Spring	Leafy	East Asia	YG094		Brassica rapa var. oleifera
R075	289451	CR 2003	y6	57	T2	B2	O2	Canada	IPK	Yellow	SC	Semi-Winter	Oilseed		An140		Brassica rapa subsp. oleifera
R076	289648	CR2203	y7			B1	G1	Italy	IPK	Brown	SC	Semi-Winter	Oilseed	Europe	YG112		Brassica rapa subsp. oleifera
R077	289649	CR2204	y8			B1	G1	Italy	IPK	Brown	SC	Semi-Winter	Oilseed	Europe	YG113		Brassica rapa subsp. oleifera
R078	289653	CR2208	y9			B2	G1	America	IPK	Brown	SC	Spring	Oilseed	America	YG114		Brassica rapa subsp. oleifera
R079	289655	CR 2210	y10			B1	O2	Slovenia	IPK	Brown	SI	Semi-Winter	Oilseed		An141		Brassica rapa subsp. oleifera var. silvestris
R080	289656	CR 2211	y11	50	T2	A2	Root type	Georgia	IPK	Black	SI	Semi-Winter	Rooty		An142		Brassica rapa subsp. oleifera var. silvestris
R081	289657	CR2212	y12			B1	G1	China	IPK	Brown	SI	Winter	Oilseed	East Asia	YG115	wild type	Brassica rapa subsp. oleifera
R082	289658	CR2213	y13	59	S1	A2	G1	Austria	IPK	Brown	SI	Spring	Oilseed	Europe	YG116	wild type	Brassica rapa subsp. oleifera
R083	289674	CR 2229	y14	64	S1	B1	O2	Italy	IPK	Brown	SI	Semi-Winter	Oilseed		An144		Brassica rapa subsp. oleifera
R084	289248	CR 1628	y4	57	S2	B1	O2	Germany	IPK	Yellow	SI	Semi-Winter	Oilseed		An138		Brassica rapa subsp. oleifera
R085	rova, svedjerova, lantsort	ATC95234	g75			A1	G3	Finland	ATFCC	Brown	SI	Winter	Rooty	Europe	YG035		Brassica rapa ssp. rapa
R086	TURKEY-3	ATC93036	g176	52	S1	B1	G1	Turkey	ATFCC	Brown	SC	Semi-Winter	Oilseed	West Asia-North Africa	YG104		Brassica rapa
R087	TURKEY-1	ATC93034	g175	51	S1	B1	G1	Turkey	ATFCC	Brown	SC	Semi-Winter	Oilseed	West Asia-North Africa	YG103		Brassica rapa
R088	290303	CR 2901	y46	71		B2	O2	Belgium	IPK	Brown	SI	Winter	Oilseed		An166		Brassica rapa subsp. oleifera
R089	290326	CR 2924	y47	58	S1	B2	O2	Russia	IPK	Yellow	SI	Semi-Winter	Oilseed		An167		Brassica rapa subsp. oleifera
R090	290327	CR 2925	y48	58	T2	A2	O1	Russia	IPK	Yellow	SI	Semi-Winter	Oilseed		An168		Brassica rapa subsp. oleifera
R091	Qidonghuangyoucai	S1174	g182			A1	G2	China	HAU	Brown	SC	Semi-Winter	Oilseed	East Asia	YG093		Brassica rapa var. oleifera
R092	Xiangxiangyoucai	S1161	g181	63	S1	A1	G3	China	HAU	Brown	SI	Semi-Winter	Oilseed	East Asia	YG092		Brassica rapa var. oleifera
R093	Guiyangzaoyoucai	S1160	g180	60	T1	A1	G2	China	HAU	Brown	SI	Semi-Winter	Oilseed	East Asia	YG091		Brassica rapa var. oleifera
R094	CGN07188	ATC95296	g179	57	T1	A2	Root type	Yugoslavia	ATFCC	Brown	SC	Winter	Rooty		An113		Brassica rapa
R095	Shaoxingguihuazhong	S1200	g184			A1	G3	China	HAU	Brown	SC	Semi-Winter	Oilseed	East Asia	YG095		Brassica rapa var. oleifera
R096	Tongxiangchanggengbai	S1201	g185			A1	G3	China	HAU	Brown	SC	Semi-Winter	Oilseed	East Asia	YG096		Brassica rapa var. oleifera
R097	Shangyoushexi	S1218	g186	58	S1	A1	G2	China	HAU	Brown	SC	Spring	Oilseed	East Asia	YG105		Brassica rapa var. oleifera
R098	Lianhuabaicai	S1219	g187			A1	G2	China	HAU	Brown	SC	Semi-Winter	Oilseed	East Asia	YG106		Brassica rapa var. oleifera
R099	Baiyesiyueman	S1336	g188	66	T1	A1	G2	China	HAU	Brown	SC	Semi-Winter	Oilseed	East Asia	YG107		Brassica rapa var. oleifera
R100	Pop Nieb E'08)	NPZ-2	A185			B1	O3	Germany	NPZ	Brown	SI	Winter	Oilseed		An182		Brassica rapa
R101	ODLARBI CL-4	ATC92662	A95	60	T2	A2	O1	India	ATFCC	Yellow	SC	Spring	Oilseed		An097		Brassica rapa
R102	YC-68	ATC92624	A82	65	T1	A2	O1	India	ATFCC	Yellow	SC	Spring	Oilseed		An086		Brassica rapa
R103	C502	ATC93102	A174	52	S1	A2	O1	Unknown	ATFCC	Yellow	SC	Semi-Winter	Oilseed		An103		Brassica rapa
R104	CGN 20735	ATC95220	A177		S2	A2	Root type	Uzbekistan	ATFCC	Brown	SI	Winter	Rooty		An107		Brassica rapa
R105	CGN 20738	ATC95223	A179		S2	A2	Root type	Uzbekistan	ATFCC	Yellow	SC	Winter	Rooty		An109		Brassica rapa
R106	PATNA CL-11	ATC92246	A19	52	S1	A2	O1	India	ATFCC	Yellow	SC	Spring	Oilseed		An044		Brassica rapa
R107	PATNA CL-7	ATC92244	A18	52	S1	A2	O1	India	ATFCC	Yellow	SC	Spring	Oilseed		An043		Brassica rapa
R108	PATNA CL-4	ATC92242	A17	51	S1	A2	O1	India	ATFCC	Yellow	SC	Spring	Oilseed		An041		Brassica rapa
R109	YC-3	ATC92597	A75	59	T1	A2	O1	India	ATFCC	Yellow	SI	Spring	Oilseed		An080		Brassica rapa
R110	NOZAKI EARLY	ATC95345	A118	78		A1	O3	Japan	ATFCC	Brown	SI	Spring	Oilseed		An115		Brassica rapa
R111	TC-66	ATC92546	A64	58	S2	A2	O1	India	ATFCC	Black	SC	Spring	Oilseed		An075		Brassica rapa
R112	TC-71	ATC92551	A65	56	S2	A2	O1	India	ATFCC	Brown	SC	Semi-Winter	Oilseed		An076		Brassica rapa
R113	TC-72	ATC92552	A66	55	S1	A2	O1	India	ATFCC	Brown	SC	Spring	Oilseed		An077		Brassica rapa
R114	TC-81	ATC92561	A69	59	T1	A2	O1	India	ATFCC	Brown	SC	Semi-Winter	Oilseed		An078		Brassica rapa
R115	BRA 1304 / 01	ATC95368	g143	62	S1	A1	G3	Mongolia	ATFCC	Brown	SC	Semi-Winter	Leafy	East Asia	YG072		Brassica rapa ssp. pekinensis
R116	Gul Finlandsk	ATC95239	g154	89	S1	A1	G1	Norway	ATFCC	Brown	SI	Winter	Rooty	Europe	YG077		Brassica rapa ssp. rapa
R117	Unkown	UWA03	g141		S1	A1	G3	South Korea	UWA	Brown	SI	Semi-Winter	Leafy	East Asia	YG070		Brassica rapa
R118	CPI 156418	ATC92131	g78	64	T1	B1	G1	Russia	ATFCC	Brown	SI	Semi-Winter	Oilseed	Europe	YG061		Brassica rapa
R119	290274	CR 2872	y43			B2	Leafy type	Germany	IPK	Brown	SI	Winter	Oilseed		An163		Brassica rapa subsp. oleifera
R120	BRA 1005	ATC95373	g70			B1	G1	Czech Republic	ATFCC	Brown	SI	Semi-Winter	Oilseed	Europe	YG059	wild type	Brassica rapa ssp. oleifera sylvestris
R121	CPI 156420	ATC92133	g80	64	S1	B1	G1	Russia	ATFCC	Brown	SI	Semi-Winter	Oilseed	Europe	YG100		Brassica rapa
R122	NABAL DE GREILOS	ATC95331	g163	62		B2	G1	Portugal	ATFCC	Brown	SI	Semi-Winter	Rooty	Europe	YG082		Brassica rapa ssp. rapa
R123	Esti Naeris	ATC95372	g82			B2	O2	Russia	ATFCC	Brown	SI	Winter	Rooty		An116		Brassica rapa subsp. rapa
R124	289245	CR 1623	y3	58	S2	B2	O2	Sweden	IPK	Brown	SC	Semi-Winter	Oilseed		An137		Brassica rapa subsp. oleifera
R125	289741	CR 2296	y23	55	S2	B1	O2	Italy	IPK	Brown	SC	Spring	Oilseed		An149		Brassica rapa subsp. oleifera
R126	289684	CR2239	y18	56	S2	A1	G1	Iraq	IPK	Brown	SI	Winter	Rooty	West Asia-North Africa	YG119		Brassica rapa subsp. oleifera
R127	289685	CR2240	y19	58	S2	B1	G1	Iraq	IPK	Brown	SC	Winter	Rooty	West Asia-North Africa	YG120		Brassica rapa subsp. oleifera
R128	289687	CR 2242	y21	54	S2	A2	O2	Georgia	IPK	Brown	SI	Spring	Oilseed		An147		Brassica rapa subsp. oleifera var. silvestris
R129	2007 new material	7F132	D39			A1	G2	China	NPZ	Brown	SC	Spring	Leafy	East Asia	YG153		Brassica rapa
R130	289743	CR 2298	y25	60	S2	B1	Leafy type	Italy	IPK	Brown	SI	Semi-Winter	Leafy		An151		Brassica rapa subsp. oleifera
R131	289742	CR 2297	y24	79		B1	O2	Italy	IPK	Brown	SI	Winter	Leafy		An150		Brassica rapa subsp. oleifera
R132	97142	CR3387	y59			B2	G1	Spain	IPK	Brown	SC	Winter	Oilseed	Europe	YG130		Brassica rapa subsp. oleifera
R133	636037	CR 3391	y56	63		B2	O2	Spain	IPK	Yellow	SC	Winter	Oilseed		An176		Brassica rapa subsp. oleifera
R134	Native of Yi Chang	7F089	D36			A1	G2	China	NPZ	Brown	SI	Spring	Oilseed	East Asia	YG166		Brassica rapa oleifera
R135	Y248 free cross	7F025	D43	61	T1	A1	G2	China	NPZ	Brown	SC	Semi-Winter	Oilseed	East Asia	YG173		Brassica rapa
R136	variety of double low	7F263	D41			A1	G2	China	NPZ	Brown	SC	Spring	Oilseed	East Asia	YG159		Brassica rapa
R137	636039	CR 3393	y57			B2	O2	Spain	IPK	Brown	SC	Winter	Oilseed		An177		Brassica rapa subsp. oleifera
R138	289683	CR 2238	y17	61	S2	A1	O2	Italy	IPK	Brown	SC	Semi-Winter	Oilseed		An145		Brassica rapa subsp. oleifera
R139	289686	CR 2241	y20	53	S1	A2	O2	Georgia	IPK	Yellow	SI	Spring	Oilseed		An146		Brassica rapa subsp. oleifera
R140	289698	CR 2253	y22	55	S1	B1	O2	Italy	IPK	Brown	SI	Spring	Oilseed		An148		Brassica rapa subsp. oleifera
R141	06Y240-2+1	7F014	D34	62	T1	A1	G2	China	NPZ	Brown	SC	Spring	Oilseed	East Asia	YG164		Brassica rapa
R142	636034	CR 3388	y53			B2	O2	Spain	IPK	Brown	SC	Winter	Oilseed		An173		Brassica rapa subsp. oleifera
R143	636035	CR 3389	y54	77		B2	O2	Spain	IPK	Yellow	SI	Winter	Oilseed		An174		Brassica rapa subsp. oleifera
R144	636036	CR 3390	y55	70	S2	B2	O2	Spain	IPK	Yellow	SC	Spring	Oilseed		An175		Brassica rapa subsp. oleifera
R145	Tian Thu Xiao You Cai	7F096	D19			A1	G2	China	NPZ	Brown	SI	Spring	Leafy	East Asia	YG150		Brassica rapa
R146	289673	CR 2228	y62	51	T1	A2	O2	Unknown	IPK	Brown	SC	Spring	Oilseed		An143		Brassica rapa subsp. oleifera
R147	79602	CR 3435	y60	58	T2	B1	OL	Italy	IPK	Brown	SI	Spring	Oilseed		An179		Brassica rapa subsp. oleifera
R148	CGN 7223	ATC95212	b7	73		A2	Root type	Pakistan	ATFCC	Brown	SI	Winter	Rooty		An106		Brassica rapa
R149	289243		y1	67	T1	B2		Canada	IPK	Yellow	SC	Spring	Oilseed		NA		Brassica rapa subsp. oleifera
R150	BSH-28	ATC92363	g109	53	S1	A2	O1	India	ATFCC	Brown	SC	Semi-Winter	Oilseed		An058		Brassica rapa
R151	SALAT YAPONSKII	ATC95184	g164		T1	A2	G2	Russia	ATFCC	Brown	SI	Semi-Winter	Leafy	Europe	YG083		Brassica rapa ssp. chinensis
R152	ARLO	ATC90119	g168	64		B2	G1	Sweden	ATFCC	Brown	SC	Semi-Winter	Oilseed	Europe	YG101		Brassica rapa
R153	289680	CR2235	y16			A2	G1	Tunisia	IPK	Brown	SI	Semi-Winter	Oilseed	West Asia-North Africa	YG118		Brassica rapa subsp. oleifera
R154	290018	CR 2616	y41	63	S2	A2	O2	Nepal	IPK	Brown	SC	Semi-Winter	Leafy		An161		Brassica rapa subsp. oleifera var. silvestris
R155	L-11P1	ATC92919	g122	56	T2	A2	O1	India	ATFCC	Brown	SC	Spring	Oilseed		An101		Brassica rapa
R156	CR2234/83	ATC92504	g116	50	T1	A2	OL	India	ATFCC	Yellow	SC	Spring	Oilseed		An066		Brassica rapa
R157	BS-2	ATC92355	g106		S1	A2	O1	India	ATFCC	Brown	SC	Spring	Oilseed		An055		Brassica rapa
R158	636031	CR 3385	y52	61	S1	B2	Root type	Spain	IPK	Brown	SI	Winter	Oilseed		An172		Brassica rapa subsp. oleifera var. silvestris
R159	290285	CR2883	y45	74		B2	G1	Poland	IPK	Brown	SI	Winter	Oilseed	Europe	YG128		Brassica rapa subsp. oleifera
R160	289241	CR 1619	A211	66	S2	B1	O3	Germany	IPK	Brown	SC	Spring	Oilseed		An133		Brassica rapa subsp. oleifera
R161	288983	CR 1175	A195			B2	Root type	Russia	IPK	Brown	SI	Winter	Oilseed		An119		Brassica rapa subsp. oleifera
R162	K-LOTNI-27 (ARL)	ATC92437	A47			A2	O1	India	ATFCC	Brown	SI	Spring	Oilseed		An062		Brassica rapa
R163	289215	CR 1578	A204			A2	O3	Slovakia	IPK	Brown	SC	Semi-Winter	Oilseed		An127		Brassica rapa subsp. oleifera
R164	289208	CR 1564	A203	72	S2	B2	O3	Germany	IPK	Brown	SC	Semi-Winter	Oilseed		An126		Brassica rapa subsp. oleifera
R165	NAGOAKA CHAMPION	ATC90211	A163	85	S2	B1	OL	Unknown	ATFCC	Brown	SI	Spring	Oilseed		An016		Brassica rapa
R166	KATMANDU CL-9	ATC92140	A124	47	S1	A2	O1	India	ATFCC	Brown	SC	Semi-Winter	Oilseed		An025		Brassica rapa
R167	288832	CR 1024	A194			B2	O3	Sweden	IPK	Brown	SI	Spring	Oilseed		An118		Brassica rapa subsp. oleifera
R168	289178	CR 1507	A199	69	S1	B2	O3	Germany	IPK	Brown	SI	Spring	Oilseed		An122		Brassica rapa subsp. oleifera
R169	289226	CR 1594	A205		T1	B2	O3	Germany	IPK	Brown	SI	Semi-Winter	Oilseed		An128		Brassica rapa subsp. oleifera
R170	289207	CR 1563	A202	68	T1	A1	O3	Germany	IPK	Brown	SI	Spring	Oilseed		An125		Brassica rapa subsp. oleifera
R171	289194	CR 1533	A200			B2	O3	Sweden	IPK	Brown	SI	Winter	Oilseed		An123		Brassica rapa subsp. oleifera
R172	289200	CR 1542	A201	78		B2	O3	Poland	IPK	Brown	SI	Semi-Winter	Oilseed		An124		Brassica rapa subsp. oleifera
R173	288614	CR 797	A193	71		A1	O3	Germany	IPK	Brown	SC	Semi-Winter	Oilseed		An180		Brassica rapa subsp. oleifera
R174	288245	CR 289	A192		S2	A1	O2	Russia	IPK	Black	SI	Winter	Oilseed		An165		Brassica rapa subsp. oleifera
R175	287982	CR 23	A191	94	S2	A1	O3	Russia	IPK	Brown	SI	Winter	Oilseed		An152		Brassica rapa subsp. oleifera
R176	Apetaleous pop	NPZ-6	A186			B2	O3	Germany	NPZ	Brown	SC	Winter	Oilseed		An186		Brassica rapa
R177	289159	CR 1478	A198	62		B1	O3	USA	IPK	Brown	SI	Spring	Oilseed		An121		Brassica rapa subsp. oleifera
R178	289154	CR 1470	A196	68	S1	B2	O3	Sweden	IPK	Brown	SI	Spring	Oilseed		An120		Brassica rapa subsp. oleifera
R179	289229	CR 1600	A206		T1	A1	O3	Netherlands	IPK	Brown	SI	Winter	Oilseed		An129		Brassica rapa subsp. oleifera
R180	289233	CR 1605	A207			B2	O3	Sweden	IPK	Brown	SC	Winter	Oilseed		An130		Brassica rapa subsp. oleifera
R181	289234	CR 1606	A208	70	T1	B2	O3	Australia	IPK	Yellow	SC	Spring	Oilseed		An131		Brassica rapa subsp. oleifera
R182	CGN 7220	ATC95210	A134	48	S1	A2	O1	Pakistan	ATFCC	Brown	SC	Spring	Oilseed		An105		Brassica rapa
R183	BLC 80	ATC90132	A156			B2	O3	Unknown	ATFCC	Brown	SC	Spring	Oilseed		An009		Brassica rapa
R184	BLC 38	ATC90130	A154	51		B2	O3	Unknown	ATFCC	Brown	SC	Spring	Oilseed		An007		Brassica rapa
R185	BLC 29	ATC90129	A153	50	S1	B2	O3	Unknown	ATFCC	Brown	SC	Semi-Winter	Oilseed		An006		Brassica rapa
R186	B.C.-92	ATC90122	A150	49	T1	A2	OL	Unknown	ATFCC	Yellow	SI	Spring	Oilseed		An003		Brassica rapa
R187	B.C.-8J	ATC90121	A149	78		B2	O3	Unknown	ATFCC	Brown	SI	Winter	Oilseed		An002		Brassica rapa
R188	289240	CR 1617	A210	63	S1	B2	OL	Germany	IPK	Brown	SI	Semi-Winter	Oilseed		An132		Brassica rapa subsp. oleifera
R189	Svalof 0308	ZL01	C40	61	S1	A1	G1	Sweden	HAU	Brown	SI	Semi-Winter	Oilseed	Europe	YG181		Brassica rapa oleifera biennis
R190	CGN07221	ZL02	C41	68	S2	A1	G1	Pakistan	HAU	Brown	SC	Spring	Oilseed	South Asia	YG182		Brassica rapa oleifera biennis
R191	Gruebers Winterraapzaad	ZL04	C36	74	S2	A1	G2	Germany	HAU	Brown	SC	Winter	Oilseed	Europe	YG184		Brassica rapa oleifera biennis
R192	Rapidos Winterraapzaad	ZL03	C38	59	S1	B2	G1	Germany	HAU	Brown	SI	Winter	Oilseed	Europe	YG183		Brassica rapa oleifera biennis
R193	New rapa	ZL07	C33	61	S1	B1	G2	Sweden	HAU	Brown	SC	Spring	Oilseed	East Asia	YG187		Brassica rapa
R194	1329	ZL06	C34	59	S1	B1	G2	Canada	HAU	Brown	SC	Spring	Oilseed	America	YG186		Brassica rapa
R195	TORINO	NPZ-3	A181			B2	O3	Germany	NPZ	Yellow	SI	Winter	Oilseed		An183		Brassica rapa
R196	ENIGMA	NPZ-7	A183	87		B2	O2	Russia	NPZ	Brown	SC	Winter	Oilseed		An187		Brassica rapa
R197	TC-4	ATC92484	A50			A2	O1	India	ATFCC	Brown	SC	Spring	Oilseed		An064		Brassica rapa
R198	TC-37	ATC92517	A54	57		A2	O1	India	ATFCC	Brown	SI	Spring	Oilseed		An069		Brassica rapa
R199	TC-27	ATC92507	A52	64	T1	A2	O1	India	ATFCC	Brown	SC	Spring	Oilseed		An067		Brassica rapa
R200	IB 2053	ATC92800	A108	45	S1	A2	O1	India	ATFCC	Brown	SC	Spring	Oilseed		An100		Brassica rapa
R201	KATMANDU CL-8	ATC92139	A123	46		A2	O1	India	ATFCC	Brown	SC	Spring	Oilseed		An024		Brassica rapa
R202	Budalsnepe	ATC95236	A132			B1	O3	Norway	ATFCC	Brown	SI	Winter	Rooty		An111		Brassica rapa subsp. rapa
R203	Black rapa of Xin Jin	7F079	D48			A1	G2	China	NPZ	Brown	SC	Spring	Oilseed	East Asia	YG178		Brassica rapa
R204	Qian Feng 5	7F233	D49	62	S1	A1	G2	China	NPZ	Brown	SI	Spring	Oilseed	East Asia	YG179		Brassica rapa
R205	Rapa of Yi Chang	7F226	D50			A1	G2	China	NPZ	Brown	SC	Spring	Leafy	East Asia	YG180		Brassica rapa oleifera
R206	TC-49	ATC92529	A61	53	S2	A2	O1	India	ATFCC	Brown	SC	Spring	Oilseed		An074		Brassica rapa
R207	06Y117-4	7F002	D46			A1	G2	China	NPZ	Brown	SC	Spring	Oilseed	East Asia	YG172		Brassica rapa
R208	KATMANDU CL-6	ATC92137	A122	44	S1	A2	O1	Nepal	ATFCC	Brown	SC	Spring	Oilseed		An022		Brassica rapa
R209	DS 15/55 (ARL)	ATC92396	A41	59	S1	A2	O1	India	ATFCC	Brown	SC	Spring	Oilseed		An060		Brassica rapa
R210	TORIA-ITSA	ATC92171	A12	47		A2	O1	India	ATFCC	Brown	SC	Spring	Oilseed		An032		Brassica rapa
R211	ACC 49	ATC92163	A10	46		A2	O1	India	ATFCC	Brown	SC	Spring	Oilseed		An029		Brassica rapa
R212	SV 8437520	ZL05	C35	74	S1	A1	G1	Sweden	HAU	Brown	SI	Spring	Oilseed	Europe	YG185		Brassica rapa
R213	IB 417	ATC92191	A16	52	S1		O1	India	ATFCC	Yellow	SC	Spring	Oilseed		An039		Brassica rapa
R214	KAGA	ATC90199	A161	57	S1		O1	Unknown	ATFCC	Black	SI	Semi-Winter	Oilseed		An014		Brassica rapa
R215	TC-41	ATC92521	A70	47	S1		O1	India	ATFCC	Brown	SC	Spring	Oilseed		An070		Brassica rapa
R216	CGN 20198	ATC95219	g178	65	T1		G3	Uzbekistan	ATFCC	Black	SC	Semi-Winter	Leafy	Central Asia	YG090		Brassica rapa ssp. pekinensis
R217	289244	CR 1622	y2	57	S1		O2	Sweden	IPK	Brown	SC	Spring	Oilseed		An136		Brassica rapa subsp. oleifera

## Sheet: Table S2
Table S2. Predicted value of 134 lines for 9 traits under control (C), heat stress (H), and their percentage change (%C) and stress tolerance index (STI)
		i. Yield-related traits at maturity																	ii. Physiological traits during heat stress
		Y5P				YWP				BM				HI					T1				T2				T3				CI				LC
Group	Line	C	H	%C	STI	C	H	%C	STI	C	H	%C	STI	C	H	%C	STI		C	H	%C	STI	C	H	%C	STI	C	H	%C	STI	C	H	%C	STI	C	H	%C	STI
S1	R001	0.0304747	0	-100	0	0.415728	0.196306	-52.7802	0.0811921	3.36618	3.87289	15.0531	0.112442	11.3966	5.55363	-51.2693	0.31807		-1.48554	-1.65684	-11.5313	1.10038	-3.09426	-3.00467	2.89536	1.48631	1.45557	1.51218	3.88927	2.17109	25.3722	22.5261	-11.2173	0.51347	427.154	974.599	128.161	1.57015
S1	R002	0.0151386	0	-100	0	0.352155	0.109418	-68.929	0.0383348	5.05293	7.27084	43.8935	0.316874	12.1259	3.62922	-70.0706	0.221157		-1.56751	-1.65684	-5.6989	1.1611	-2.32224	-2.09556	9.76139	0.777973	0.709025	0.726225	2.42587	0.507894	34.3503	26.6915	-22.2961	0.823709	616.824	497.884	-19.2827	1.15829
S1	R004	0.0437852	0	-100	0	0.437149	0.163909	-62.505	0.0712858	7.76841	7.48599	-3.63552	0.501579	8.03981	2.90568	-63.8588	0.117399		-1.67681	-2.25796	-34.6586	1.69269	-3.42489	-4.93928	-44.2173	2.70438	1.6511	2.5649	55.345	4.17719	29.0173	33.143	14.2179	0.864014	263.421	1123.79	326.613	1.11651
S1	R005	0.0585425	4.33e-05	-99.926	0.000192279	0.82288	0.406256	-50.63	0.332588	7.33475	8.11632	10.6557	0.513455	12.5582	5.79675	-53.8408	0.365833		-1.48554	-2.47655	-66.7104	1.64479	-2.19616	-4.98552	-127.01	1.75038	0.815484	2.35001	188.173	1.89028	30.3884	37.3027	22.7532	1.0184	671.038	910.862	35.7394	2.30531
S1	R007	0.424293	0.0016642	-99.6078	0.0535603	1.19453	0.609564	-48.9702	0.724412	6.91655	7.52319	8.77091	0.448797	16.8642	8.34816	-50.4978	0.707503		-1.37625	-3.06401	-122.635	1.88523	-2.53191	-4.27936	-69.0172	1.73214	1.06419	1.34741	26.6142	1.41436	30.2818	35.1721	16.1492	0.956868	423.563	1308.75	208.986	2.09076
S1	R010	0.124227	0.0003344	-99.7308	0.00315104	0.756376	0.183351	-75.7593	0.137972	7.38328	6.00324	-18.6915	0.38229	9.54791	2.86568	-69.9863	0.137502		-1.23963	-2.73613	-120.721	1.51637	-2.38998	-4.16484	-74.263	1.59129	1.08424	1.52511	40.6617	1.63104	22.6275	34.5457	52.6713	0.702268	270.953	976.591	260.428	0.998013
S1	R013	0.0570957	3.69e-05	-99.9354	0.000159809	0.807723	0.329316	-59.2291	0.264634	9.14561	11.5713	26.5232	0.912754	16.0585	5.91145	-63.1879	0.477056		-2.00469	-2.10768	-5.1376	1.889	-2.7741	-3.79496	-36.7996	1.68302	0.797082	1.70103	113.407	1.33738	25.5795	27.3213	6.80923	0.627864	493.783	926.711	87.6755	1.72588
S1	R017	0.0854529	0.0001625	-99.8098	0.0010533	1.48744	0.78727	-47.0723	1.16502	10.7979	10.86	0.575075	1.01141	15.3281	8.21201	-46.4252	0.632572		-1.46131	-1.9574	-33.9488	1.27879	-3.22896	-3.04917	5.56795	1.57399	1.49794	1.30864	-12.6374	1.93354	27.8504	30.9077	10.9777	0.773337	678.151	714.677	5.38612	1.82795
S1	R019	0.202644	0.0006819	-99.6635	0.0104815	1.00569	0.342319	-65.9616	0.342503	7.09128	5.92234	-16.4841	0.362223	12.6898	7.3751	-41.8819	0.470323		-1.07569	-2.44923	-127.69	1.17786	-2.02628	-4.87047	-140.365	1.57771	1.00787	2.30593	128.792	2.2924	26.008	31.7867	22.2186	0.742718	535.196	1440.92	169.233	2.9086
S1	R023	0.0576744	3.94e-05	-99.9317	0.000172366	0.953542	0.481741	-49.4788	0.457009	7.6238	8.68443	13.9121	0.571046	14.046	6.30461	-55.1145	0.445022		-1.61169	-1.3153	18.3902	0.94773	-2.47974	-4.04082	-62.9532	1.60189	1.00434	2.55771	154.667	2.53379	23.7427	29.7928	25.482	0.635498	696.639	813.711	16.8053	2.138
S1	R028	0.0640404	6.76e-05	-99.8944	0.000328377	0.717592	0.256671	-64.2316	0.183242	9.51202	11.038	16.0425	0.905567	10.0385	3.2614	-67.5111	0.16453		-1.46812	-2.72247	-85.4386	1.78691	-2.56871	-4.19623	-63.3592	1.72319	0.99847	1.54832	55.0695	1.52488	21.481	26.6385	24.0093	0.514087	554.362	902.854	62.8636	1.88773
S1	R033	0.123165	0.0003297	-99.7323	0.0030802	0.586429	0.152736	-73.9549	0.0891103	8.90992	8.9809	0.796561	0.690164	9.9957	2.92015	-70.7859	0.146686		-1.51287	-2.50388	-65.5055	1.69352	-1.82091	-3.63691	-99.7302	1.05871	0.392827	1.22781	212.556	0.475742	30.4199	32.5328	6.94562	0.889099	364.36	813.612	123.299	1.11809
S1	R035	0.0973167	0.0002151	-99.779	0.00158781	0.475482	0.482986	1.57819	0.228475	14.0941	15.1682	7.6205	1.84387	9.00847	3.64003	-59.5932	0.164789		-1.15766	-2.10768	-82.0643	1.09085	-2.3096	-3.61836	-56.6658	1.336	1.10411	1.6041	45.2839	1.74697	31.7447	25.0867	-20.9736	0.715463	342.833	585.941	70.9113	0.757646
S1	R037	0.0657829	0.0015221	-97.6862	0.007595	0.659404	0.146997	-77.7076	0.0964342	12.596	14.4876	15.0171	1.57393	8.85757	2.30214	-74.0094	0.102475		-1.25329	-1.52023	-21.2987	0.851801	-2.24697	-1.81465	19.2402	0.651852	0.896399	0.637722	-28.8574	0.563863	46.0469	41.3905	-10.1124	1.71227	509.503	579.146	13.669	1.11292
S1	R039	0.0886359	0.0001766	-99.8008	0.00118733	1.22126	0.37118	-69.6067	0.450985	8.49067	9.02234	6.26184	0.660722	13.8751	5.11658	-63.1241	0.35677		-1.74512	-1.62952	6.62391	1.27134	-2.5932	-1.65363	36.2319	0.685541	0.749174	0.401822	-46.3647	0.296932	28.8697	29.4532	2.02139	0.763917	403.835	584.804	44.8126	0.890726
S1	R040	0.156073	0.0042371	-97.2852	0.0501613	0.539124	0.162329	-69.8902	0.0870674	3.30452	3.68984	11.6605	0.105166	15.3289	5.79673	-62.1842	0.446544		-1.74512	-1.46558	16.0182	1.14344	-2.96012	-4.02211	-35.8765	1.90336	1.23141	2.4408	98.2112	2.96466	39.0211	41.6737	6.79784	1.46094	466.586	1079.33	131.325	1.8994
S1	R044	0.0213025	0	-100	0	0.589654	0.374469	-36.4934	0.219677	10.8692	10.691	-1.63984	1.00224	9.65227	4.41333	-54.2768	0.214076		-1.02895	-2.16697	-110.6	0.996839	-1.72954	-4.26933	-146.847	1.18045	0.815279	2.02697	148.622	1.63002	37.467	40.9038	9.1727	1.37684	578.507	575.928	-0.445768	1.25663
S1	R045	0.0351044	0	-100	0	1.04339	0.823193	-21.1042	0.854517	11.2897	11.8001	4.52092	1.14903	11.6884	6.30982	-46.0166	0.370634		-1.7861	-1.64318	8.00178	1.31211	-3.12087	-3.6619	-17.336	1.827	1.28249	2.01895	57.4234	2.554	28.0893	27.1886	-3.20663	0.686118	956.029	628.473	-34.2621	2.26614
S1	R050	0.0536593	0.0081235	-84.861	0.0330643	0.287963	0.090883	-68.4393	0.026037	21.8691	23.441	7.18781	4.42146	6.60656	1.41953	-78.5133	0.0471294		-1.08935	-2.20332	-102.26	1.07306	-2.30261	-4.70811	-104.468	1.7331	1.2264	2.39637	95.3991	2.89886	45.9075	42.8815	-6.59143	1.76858	448.873	1104.12	145.976	1.86926
S1	R052	0.153767	0.0062524	-95.9339	0.0729261	0.647648	0.336522	-48.0394	0.216832	13.9819	16.3686	17.0696	1.97395	8.80485	2.82323	-67.9355	0.124922		-1.4309	-2.28529	-59.7103	1.46193	-3.06468	-4.37344	-42.7044	2.14273	1.52073	2.08968	37.4132	3.13453	33.4316	35.2072	5.31087	1.05745	852.567	883.114	3.58298	2.83971
S1	R055	0.0993422	0.0002241	-99.7744	0.00168868	0.764456	0.326267	-57.3204	0.24814	7.34277	9.39892	28.0023	0.595245	12.3402	4.60794	-62.6591	0.285759		-1.30794	-2.77711	-112.327	1.6239	-3.15258	-5.31131	-68.4749	2.67686	1.71505	2.45151	42.9404	4.14717	32.9825	36.2311	9.84933	1.07359	375.505	1288.61	243.168	1.82502
S1	R063	0.0213028	0	-100	0	0.387301	0.14878	-61.5854	0.0573276	4.08402	4.77944	17.0277	0.168354	8.9198	3.06319	-65.6585	0.13731		-1.99103	-1.62952	18.1568	1.45049	-3.70795	-3.67319	0.937285	2.17738	1.5836	2.06388	30.3283	3.22383	26.4452	30.1998	14.1975	0.717502	523.703	831.69	58.8096	1.64277
S1	R064	0.115289	0.0075286	-93.4698	0.0658376	0.643445	0.283164	-55.9925	0.181268	7.26462	8.15886	12.3095	0.511211	10.7819	4.06592	-62.2894	0.220306		-1.52653	-3.44654	-125.776	2.35216	-2.6026	-5.04922	-94.0068	2.10083	1.02028	1.6385	60.593	1.64894	40.1954	42.8142	6.5153	1.54609	406.875	1008.57	147.882	1.54773
S1	R068	0.122202	0.0003254	-99.7337	0.00301624	0.667964	0.239101	-64.2045	0.158893	6.98995	8.41816	20.4323	0.507516	11.1717	3.77062	-66.2485	0.211692		-1.58117	-3.29626	-108.469	2.33013	-2.41497	-5.4648	-126.288	2.10981	0.871751	2.07128	137.6	1.78103	23.6759	26.6771	12.6761	0.567435	664.911	900.82	35.4798	2.25908
S1	R069	0.17718	0.0005691	-99.6788	0.00764847	1.22152	0.371448	-69.5915	0.45141	10.1875	9.72834	-4.50671	0.854796	11.9314	4.57141	-61.686	0.274104		-1.99103	-3.73344	-87.5129	3.32326	-2.46228	-5.74517	-133.327	2.26151	0.556857	1.90418	241.951	1.0459	31.0957	29.9926	-3.54753	0.837889	819.763	1081.37	31.9119	3.34341
S1	R072	0.141343	0.0102483	-92.7493	0.109875	1.56767	0.696219	-55.5889	1.08585	12.8707	12.8688	-0.014902	1.42856	13.4757	6.30359	-53.2226	0.426885		-1.144	-1.87543	-63.9369	0.95919	-2.18891	-3.88152	-77.3269	1.35827	1.06038	1.99388	88.0352	2.08546	49.7419	45.479	-8.57	2.03238	342.218	651.26	90.3054	0.840595
S1	R073	0.0151386	0	-100	0	0.395416	0.196007	-50.4302	0.0771075	5.10115	5.86554	14.9846	0.258068	8.79769	3.12764	-64.4493	0.138279		-1.51287	-1.71149	-13.1291	1.15759	-2.4346	-2.85225	-17.1549	1.11013	0.893842	1.2953	44.9136	1.14201	34.2932	29.9179	-12.7586	0.921743	436.275	872.696	100.034	1.43599
S1	R082	0.080344	0.0001399	-99.8259	0.000852595	0.74838	0.206174	-72.4506	0.153507	10.376	11.2208	8.14181	1.00418	10.6156	3.27147	-69.1824	0.174526		-1.6085	-2.84542	-76.8991	2.04619	-3.00716	-4.2885	-42.6095	2.06167	1.27304	1.54641	21.474	1.9418	25.089	23.12	-7.84795	0.521126	439.402	776.847	76.7965	1.28744
S1	R083	0.134933	0.0003818	-99.717	0.00390775	0.758459	0.29987	-60.4633	0.226275	9.31078	9.84538	5.74177	0.790636	10.1243	3.62087	-64.2358	0.184225		-1.48554	-3.03669	-104.416	2.0168	-2.55475	-5.46749	-114.012	2.23303	1.08436	2.30359	112.439	2.46388	32.4294	30.0106	-7.45855	0.874349	826.859	774.455	-6.33778	2.41522
S1	R086	0.0889509	0.0059651	-93.2939	0.0402476	0.681764	0.151677	-77.7523	0.102879	8.83884	10.0293	13.4682	0.76458	9.61767	2.6426	-72.5235	0.127724		-1.22597	-2.12134	-73.0343	1.1627	-2.83647	-3.40492	-20.0409	1.54398	1.4493	1.45665	0.507002	2.08236	30.9283	30.9834	0.178057	0.860909	679.872	553.402	-18.6021	1.41905
S1	R087	0.067802	8.43e-05	-99.8757	0.000433553	0.386142	0.130582	-66.1829	0.0501651	5.92658	5.23177	-11.7236	0.26743	8.74852	2.79975	-67.9974	0.123091		-1.37625	-1.42459	-3.51289	0.876527	-2.61335	-4.15517	-58.9974	1.73598	1.26991	2.58768	103.768	3.24134	34.2675	34.1539	-0.33151	1.05146	468.974	1118.38	138.473	1.97818
S1	R089	0.143903	0.0004216	-99.707	0.00460197	0.994542	0.479026	-51.8345	0.473972	9.91326	10.0898	1.78121	0.862698	11.3643	4.92015	-56.7051	0.280991		-1.86807	-1.65684	11.3073	1.38374	-2.61605	-3.56836	-36.4028	1.49235	0.807279	1.88858	133.943	1.50383	46.502	42.8463	-7.86132	1.79001	591.285	1009.78	70.778	2.25193
S1	R092	0.0151386	0	-100	0	0.501822	0.203885	-59.3711	0.10179	5.20704	6.34019	21.7617	0.284742	10.6133	3.8157	-64.0478	0.203514		-1.56751	-4.12963	-163.451	2.89401	-1.89725	-5.4269	-186.041	1.64601	0.392999	1.32651	237.534	0.514211	24.9903	31.2974	25.2383	0.70267	637.244	1412.46	121.652	3.39478
S1	R097	0.0544915	2.53e-05	-99.9536	0.000104573	0.432495	0.323038	-25.3083	0.138997	9.10035	10.0709	10.6648	0.790466	8.88032	3.82101	-56.9722	0.170521		-1.34892	-2.84542	-110.94	1.71598	-2.06714	-3.36218	-62.6492	1.11109	0.669614	0.765636	14.3399	0.505694	27.1371	29.6322	9.19469	0.722435	658.592	830.616	26.1199	2.06322
S1	R103	0.432127	0.0066179	-98.4685	0.216922	1.48836	0.377158	-74.6594	0.558472	7.74295	8.48318	9.56012	0.566531	12.8417	4.67596	-63.5876	0.301762		-1.19864	-1.94374	-62.1617	1.04161	-1.58032	-4.93176	-212.073	1.24596	0.60516	2.721	349.633	1.6242	35.3446	45.2725	28.0889	1.43757	400.495	669.506	67.1698	1.0113
S1	R106	0.269203	0.0024236	-99.0997	0.0494894	1.82047	0.439404	-75.8631	0.795825	9.40634	8.61576	-8.40476	0.698992	15.7393	6.02474	-61.7218	0.476536		-1.7861	-2.05304	-14.9451	1.63939	-3.52784	-3.75357	-6.3983	2.11695	1.57449	1.78875	13.6079	2.77798	45.7987	42.7728	-6.6071	1.75992	382.877	724.298	89.1725	1.04594
S1	R107	0.297556	0.0016812	-99.435	0.0379454	1.64956	0.402557	-75.5961	0.660643	10.623	10.7162	0.87725	0.981847	14.4822	5.169	-64.3079	0.376194		-1.79976	-2.59951	-44.4361	2.09163	-3.42139	-4.75756	-39.0534	2.60223	1.50353	2.1316	41.7731	3.16125	37.8562	41.8132	10.4526	1.42207	442.966	815.02	83.9914	1.36166
S1	R108	0.278174	0.0027528	-99.0104	0.0580849	2.4254	0.52948	-78.1694	1.27763	13.6011	11.3803	-16.3281	1.33502	14.5443	5.36522	-63.1112	0.39215		-1.71779	-1.80712	-5.20034	1.38783	-3.38833	-4.49144	-32.5563	2.43293	1.59682	2.56974	60.9283	4.04749	45.4971	50.9046	11.8855	2.08071	466.976	865.114	85.2588	1.52369
S1	R113	0.0151386	0	-100	0	0.390777	0.392064	0.329344	0.152425	10.1363	11.0577	9.08978	0.966728	7.78085	3.23605	-58.4101	0.126536		-1.23963	-2.79077	-125.13	1.54666	-2.23917	-5.04224	-125.183	1.80496	1.0249	2.16531	111.271	2.18898	23.4668	30.2574	28.9372	0.637908	373.148	1142.79	206.257	1.60834
S1	R115	0.089302	0.0001796	-99.7989	0.00121658	0.946059	0.552155	-41.6363	0.519697	12.244	13.526	10.4709	1.4284	11.2713	4.67739	-58.5016	0.26494		-1.76208	-1.16502	33.8838	0.917775	-2.68384	-2.24224	16.454	0.962047	0.88564	1.25052	41.1991	1.09241	24.0123	24.2782	1.10764	0.523747	767.719	1416.72	84.5369	4.1022
S1	R116	0.0952912	0.0002061	-99.7837	0.00148971	0.52489	0.241353	-54.0184	0.126035	5.35449	5.44418	1.6751	0.251425	11.437	5.14982	-54.9724	0.29599		-1.33526	-1.64318	-23.0606	0.980912	-2.18918	-3.16891	-44.7534	1.10904	0.873398	1.6	83.1922	1.37839	24.9691	30.1068	20.5761	0.675366	267.728	416.137	55.4328	0.420202
S1	R117	0.0151386	0	-100	0	0.502766	0.156325	-68.907	0.0781925	13.515	15.074	11.5358	1.75712	8.51817	2.29041	-73.1115	0.0980463		-1.83727	-2.80444	-52.6413	2.30355	-2.53594	-4.48903	-77.0164	1.8199	0.780361	1.68818	116.333	1.29944	30.349	29.4033	-3.11612	0.801698	287.293	405.972	41.3098	0.439896
S1	R121	0.0563203	3.34e-05	-99.9407	0.000142687	0.535347	0.225902	-57.8027	0.120317	8.59807	10.3269	20.1074	0.765825	9.47775	3.05298	-67.7879	0.145412		-1.18498	-0.837135	29.3546	0.443491	-2.937	-3.54658	-20.7552	1.66522	1.69068	2.62419	55.2148	4.3762	32.1806	27.0744	-15.8674	0.782754	984.644	629.347	-36.0837	2.33722
S1	R139	0.134933	0.0003818	-99.717	0.00390775	0.885275	0.505566	-42.8916	0.445274	8.17364	9.06787	10.9403	0.639262	12.2545	5.52937	-54.879	0.340521		-1.33526	-2.3536	-76.2647	1.405	-3.16361	-4.43123	-40.069	2.24112	1.67496	2.09612	25.1447	3.46306	34.7222	34.305	-1.20154	1.07013	397.458	665.837	67.5238	0.998133
S1	R140	0.145929	0.0004306	-99.7049	0.00476637	1.17077	0.311366	-73.405	0.362671	8.37556	9.3096	11.152	0.672517	16.5127	5.95704	-63.9246	0.494335		-1.45822	-2.14867	-47.349	1.40078	-2.63916	-4.04388	-53.226	1.70617	1.14905	1.90521	65.807	2.15935	41.9758	43.1778	2.86363	1.62829	370.122	650.67	75.7986	0.908313
S1	R150	0.037998	0	-100	0	0.620802	0.275287	-55.6562	0.170024	4.32739	5.31323	22.7816	0.198309	13.3002	5.765	-56.6548	0.385327		-1.26695	-3.105	-145.076	1.75873	-1.95639	-4.14253	-111.744	1.29562	0.682659	1.17279	71.7976	0.789706	17.5826	16.3333	-7.10538	0.258005	645.112	628.491	-2.5765	1.5292
S1	R157	0.152584	0.00046	-99.6985	0.00532402	1.20792	0.594679	-50.7684	0.714648	11.0159	11.9079	8.09699	1.1314	12.5694	5.52154	-56.0717	0.348777		-1.54019	-2.95472	-91.841	2.03455	-2.75663	-5.79275	-110.139	2.55282	1.23175	2.63819	114.182	3.20532	22.9268	27.4572	19.7606	0.565551	468.649	1520.91	224.532	2.68833
S1	R158	0.0504623	0.0049265	-90.2373	0.0188572	0.468908	0.193725	-58.6859	0.0903741	15.7161	16.9903	8.10747	2.30304	12.0283	3.79298	-68.4663	0.229275		-1.70413	-2.33994	-37.3096	1.78273	-2.70475	-3.82158	-41.2912	1.65245	0.967085	1.55574	60.8695	1.48403	40.9635	41.176	0.518754	1.51535	407.442	705.49	73.1509	1.08414
S1	R166	0.177469	0.0005703	-99.6786	0.00767712	0.839433	0.414066	-50.6731	0.345801	11.6044	11.1252	-4.12994	1.1135	10.1285	4.25092	-58.0303	0.216372		-1.47188	-2.2443	-52.4786	1.47683	-2.33729	-4.33151	-85.3218	1.61849	0.911162	2.03187	122.998	1.82613	40.4928	43.449	7.30053	1.58062	399.131	614.649	53.9966	0.925278
S1	R168	0.0310749	0	-100	0	0.991403	0.586203	-40.8714	0.578188	12.9452	12.0492	-6.92084	1.34532	11.2022	5.49549	-50.9428	0.309372		-0.898084	-1.76614	-96.6562	0.70912	-2.07063	-4.27049	-106.241	1.41364	1.20544	2.40497	99.5098	2.85954	31.7073	40.5669	27.942	1.15559	696.799	1202.86	72.6263	3.1612
S1	R178	0.135744	0.004147	-96.945	0.0426999	1.01979	0.735903	-27.8376	0.746623	11.8297	12.0702	2.03318	1.23153	11.7479	6.08397	-48.2124	0.359186		-1.40357	-1.46558	-4.41787	0.919648	-2.10826	-4.04765	-91.9895	1.36422	0.835361	2.429	190.773	2.00144	34.4582	41.1252	19.3479	1.27313	728.96	996.585	36.7134	2.73998
S1	R182	0.0929763	0.0001959	-99.7893	0.00138159	0.601093	0.417613	-30.5244	0.249739	15.1417	17.4062	14.9555	2.2732	8.38071	2.92182	-65.1364	0.123057		-1.79976	-2.32627	-29.2543	1.87178	-3.45392	-4.99573	-44.6395	2.75847	1.5721	2.54502	61.8864	3.94651	34.8452	42.4005	21.6824	1.32735	442.222	676.926	53.0738	1.12904
S1	R185	0.0698275	9.33e-05	-99.8664	0.000494174	0.535743	0.564618	5.38971	0.300942	15.2723	15.9107	4.18018	2.09581	7.99334	3.3491	-58.1014	0.134533		-1.62216	-1.76614	-8.87576	1.28084	-3.13081	-3.4525	-10.2749	1.72802	1.3968	1.7687	26.6252	2.43684	40.303	40.718	1.02945	1.47433	546.819	1097.55	100.715	2.26359
S1	R188	0.14875	0.0004431	-99.7021	0.00499956	0.871355	0.574732	-34.0416	0.498232	11.025	11.913	8.05437	1.13282	11.1415	5.07396	-54.4588	0.284093		-1.38611	-1.47924	-6.71849	0.916677	-2.8495	-4.08984	-43.5285	1.86309	1.43242	2.50733	75.0413	3.54262	36.9467	34.2701	-7.24462	1.13753	740.878	1072.73	44.7914	2.99754
S1	R189	0.0151386	0	-100	0	0.642988	0.431869	-32.834	0.276265	14.2719	15.2287	6.70382	1.87458	9.78861	4.01514	-58.9815	0.197512		-1.90906	-1.67051	12.4958	1.42576	-3.47811	-3.3474	3.7583	1.86127	1.43997	1.7626	22.4057	2.5035	32.7889	30.7075	-6.34794	0.904571	575.753	1195.94	107.718	2.59701
S1	R192	0.0151386	0	-100	0	1.58012	0.637178	-59.6754	1.00167	11.7594	10.1878	-13.3652	1.03329	14.6197	8.0789	-44.7395	0.593556		-1.63582	-1.87543	-14.6477	1.37156	-1.29835	-3.3474	-157.82	0.694794	-0.085461	1.45892	1807.11	-0.122981	33.7058	30.5674	-9.31121	0.925624	459.338	1062.11	131.227	1.84007
S1	R193	0.10918	0.0002677	-99.7548	0.002217	1.00317	0.495033	-50.6529	0.494057	9.90425	9.62173	-2.85247	0.821927	11.3351	5.12362	-54.7988	0.29186		-1.74512	-2.01205	-15.2961	1.56979	-2.62626	-4.09952	-56.0975	1.72119	0.922268	2.03312	120.448	1.84953	34.1219	34.548	1.24891	1.05908	571.643	756.558	32.348	1.63116
S1	R194	0.0964486	0.0002113	-99.7809	0.00154585	0.615944	0.212143	-65.5581	0.129999	8.45363	9.95888	17.806	0.726126	9.81021	3.02763	-69.138	0.149263		-1.63582	-1.93008	-17.9884	1.41153	-2.24482	-3.15601	-40.5905	1.1326	0.645926	1.33311	106.388	0.849358	31.9022	29.326	-8.07525	0.840513	726.975	615.986	-15.2672	1.68896
S1	R200	0.101393	0.0060203	-94.0624	0.046302	0.47617	0.118998	-75.0093	0.0563732	5.66073	4.84774	-14.3619	0.236684	8.5651	2.40559	-71.914	0.103544		-1.58117	-2.38092	-50.5792	1.68307	-2.82114	-4.78794	-69.7164	2.15939	1.22748	2.30878	88.0909	2.79536	31.6013	40.7196	28.8541	1.15606	356.527	604.063	69.4296	0.812278
S1	R204	0.0151386	0	-100	0	0.505918	0.300483	-40.6064	0.151241	8.52739	10.7016	25.497	0.78709	8.89923	3.20772	-63.9551	0.143457		-1.77244	-1.52023	14.2298	1.20464	-1.37066	-1.29478	5.5361	0.283715	-0.259293	0.112606	143.428	-0.0288	32.523	29.6994	-8.68176	0.867782	464.454	1111.63	139.341	1.94729
S1	R208	0.0607993	5.33e-05	-99.9123	0.000245809	0.446696	0.132326	-70.3767	0.0588069	3.41355	3.85749	13.0052	0.113571	9.57469	2.89659	-69.7474	0.139374		-1.45822	-1.97107	-35.1695	1.285	-2.14993	-4.03447	-87.656	1.38666	0.776639	2.00573	158.257	1.5365	26.8847	33.6754	25.2584	0.813373	392.475	602.962	53.6307	0.892548
S1	R209	0.0654876	0.0001758	-99.7316	0.000873272	0.619683	0.50624	-18.3066	0.312102	6.23828	6.9731	11.7791	0.375188	11.9653	5.5554	-53.5706	0.334048		-0.720481	-1.96019	-172.066	0.63139	-2.00889	-3.96651	-97.4475	1.27386	1.26081	2.02113	60.3042	2.51354	23.6333	28.2838	19.6778	0.600527	806.411	1303.54	61.6466	3.96469
S1	R212	0.0213028	0	-100	0	1.10794	0.586217	-47.0894	0.646167	9.7139	11.0451	13.7042	0.925384	12.4702	5.54073	-55.5683	0.347227		-1.90906	-2.79077	-46.1859	2.38189	-2.86335	-4.07614	-42.3556	1.86587	0.903866	1.38415	53.1362	1.23403	30.3112	34.7854	14.761	0.947266	581.334	988.96	70.1191	2.16837
S1	R213	0.424003	0.0016629	-99.6078	0.0534819	1.24906	0.252883	-79.7542	0.31425	8.32911	9.0474	8.62393	0.649951	14.4049	4.57629	-68.231	0.33128		-1.4992	-2.12135	-41.4982	1.42184	-3.05555	-3.89818	-27.5774	1.90418	1.43763	1.83909	27.9249	2.6079	41.627	42.874	2.99567	1.6034	358.072	1056.45	195.039	1.42675
S1	R214	0.0770615	0.0001253	-99.8374	0.00073242	0.485983	0.403144	-17.0457	0.194918	8.0209	7.98514	-0.445873	0.552413	10.1275	6.16744	-39.1019	0.31389		-1.28062	-1.88909	-47.5147	1.08156	-2.44454	-4.82262	-97.2811	1.88468	1.22082	2.73564	124.082	3.29421	41.9134	44.1724	5.38976	1.66332	522.676	935.452	78.9738	1.84409
S1	R215	0.130014	0.00036	-99.7231	0.0035503	0.862065	0.423293	-50.8978	0.363038	7.94191	8.60272	8.32061	0.589277	11.4892	5.34339	-53.4921	0.308517		-1.30794	-2.16233	-65.3235	1.26441	-1.85397	-4.62962	-149.714	1.37216	0.690814	2.31401	234.969	1.57677	26.0742	35.2937	35.3586	0.826763	498.4	853.134	71.1746	1.60371
S1	R217	0.121333	0.0003216	-99.7349	0.00295984	1.25419	0.442389	-64.7272	0.552	8.86169	9.17516	3.53737	0.701275	14.1481	5.71523	-59.6042	0.406353		-1.6085	-2.3536	-46.3226	1.69251	-3.19936	-5.56372	-73.9014	2.84568	1.56544	2.97188	89.8428	4.58891	38.0737	37.634	-1.15484	1.28729	487.523	1132.38	132.272	2.08217
S2	R053	0.185282	0.000605	-99.6735	0.00850276	2.27807	1.93003	-15.2779	4.37422	20.9285	19.4875	-6.88502	3.51765	13.5864	9.02614	-33.5651	0.616282		-1.64948	-2.46289	-49.3128	1.81623	-2.01472	-4.996	-147.975	1.60914	0.540345	2.34089	333.222	1.24765	38.3643	38.9591	1.55045	1.34279	881.779	1052.27	19.3344	3.49958
S2	R054	0.0356831	0	-100	0	0.607724	0.198677	-67.308	0.120123	17.5856	17.185	-2.27801	2.60654	7.80283	2.51443	-67.7754	0.0985969		-1.45822	-2.0667	-41.7276	1.34734	-2.64346	-3.54094	-33.9508	1.49641	1.12257	1.57329	40.1509	1.74205	51.538	53.2686	3.35777	2.46644	1042.95	834.879	-19.95	3.28409
S2	R067	0.0151386	0	-100	0	1.81993	0.770316	-57.6732	1.39474	18.2275	18.0383	-1.03801	2.83584	13.033	5.36832	-58.8097	0.351603		-1.90906	-1.91642	-0.385583	1.63564	-3.27732	-3.07805	6.08013	1.61269	1.23812	1.33414	7.75546	1.62932	33.7409	31.682	-6.10218	0.960374	475.57	1240.67	160.88	2.22535
S2	R070	0.0530447	1.89e-05	-99.9644	7.60459e-05	1.79904	0.657339	-63.4617	1.17652	15.9314	17.3603	8.96905	2.38544	13.8361	6.06906	-56.1359	0.421993		-1.51287	-1.68417	-11.323	1.13911	-2.23891	-2.1219	5.22616	0.759485	0.686813	0.723719	5.37352	0.490286	22.0069	19.5993	-10.9398	0.387499	481.037	920.41	91.3387	1.6699
S2	R084	0.171108	0.0016996	-99.0067	0.0220592	2.73942	1.70749	-37.6697	4.65357	18.0035	20.4256	13.4536	3.1717	18.0743	8.90064	-50.7552	0.80845		-1.18498	-1.26065	-6.38575	0.667859	-2.4303	-2.6286	-8.15965	1.02128	1.18168	1.51417	28.1369	1.76489	39.5819	41.9984	6.10496	1.49349	476.301	706.999	48.4354	1.27008
S2	R104	0.0663554	0.0001096	-99.8348	0.000551644	1.88635	1.4347	-23.9433	2.69248	21.0201	22.3502	6.32772	4.05206	12.1605	6.17479	-49.2227	0.377352		-1.29428	-1.8098	-39.8311	1.04722	-1.82566	-3.88405	-112.748	1.13361	0.654215	1.98964	204.127	1.28392	42.3751	35.7365	-15.6661	1.36049	677.321	932.553	37.6826	2.3823
S2	R105	0.0620148	5.87e-05	-99.9053	0.000276125	0.744835	1.03153	38.4908	0.764385	24.99	27.4547	9.86299	5.91754	9.6021	4.20232	-56.2354	0.202781		-1.4989	-1.58854	-5.97977	1.06451	-2.2596	-3.78507	-67.5106	1.3673	0.871739	2.1261	143.892	1.82815	33.2109	35.9285	8.18293	1.07199	536.777	838.084	56.1328	1.69672
S2	R111	0.0429171	0	-100	0	1.58325	1.85246	17.0035	2.9179	17.9629	19.6132	9.18772	3.03866	12.2336	7.6213	-37.702	0.468549		-1.22597	-2.32627	-89.7499	1.27502	-3.36467	-4.71456	-40.1193	2.53595	1.94685	2.36802	21.633	4.54735	35.0823	34.9237	-0.452023	1.10073	662.941	1181.08	78.1575	2.95313
S2	R112	0.137827	0.0003946	-99.7137	0.00412537	1.86478	0.903765	-51.535	1.67669	15.4854	15.2672	-1.40865	2.03911	12.8914	5.97012	-53.689	0.386771		-1.02104	-3.22795	-216.143	1.47349	-1.98918	-3.66809	-84.4017	1.16647	0.862	0.721556	-16.2928	0.613505	32.351	31.394	-2.95803	0.912443	602.072	896.354	48.8783	2.03543
S2	R124	0.178403	0.0153315	-91.4062	0.207471	1.8112	1.33163	-26.4782	2.39949	20.0693	21.3087	6.17565	3.68847	12.3222	6.34605	-48.4991	0.392974		-1.52653	-0.94643	38.0011	0.645908	-1.78462	-1.74987	1.94736	0.499241	0.355407	0.993331	179.491	0.348226	40.7255	42.3773	4.05596	1.5505	393.877	758.22	92.5017	1.12638
S2	R125	0.12307	0.0003292	-99.7325	0.00307314	0.955084	0.199625	-79.0987	0.189683	25.2339	23.8848	-5.34649	5.19834	8.10376	2.01632	-75.1187	0.0821141		-1.84075	-2.59951	-41.2202	2.13926	-3.32919	-4.32263	-29.8403	2.30062	1.36473	1.77604	30.1385	2.39079	30.8146	30.2737	-1.75534	0.838096	493.484	610.598	23.732	1.13647
S2	R126	0.0805338	0.0001407	-99.8253	0.000859496	0.817322	0.358538	-56.1326	0.291541	20.1542	23.3406	15.81	4.05729	8.92669	2.7161	-69.5733	0.121845		-1.15766	-2.36726	-104.487	1.22519	-2.62276	-6.09758	-132.487	2.55666	1.51311	3.38263	123.555	5.04853	50.1681	47.2434	-5.82992	2.12932	539.761	617.236	14.3536	1.25656
S2	R127	0.200039	0.0006704	-99.6649	0.0101723	1.72691	0.618629	-64.1772	1.06285	16.2978	16.853	3.40608	2.369	12.6756	4.81018	-62.0517	0.306409		-1.33526	-2.57219	-92.6352	1.53549	-2.62518	-4.7702	-81.7093	2.00195	1.25311	2.1472	71.3502	2.65401	40.2055	42.6332	6.03823	1.53994	943.451	638.938	-32.2765	2.27357
S2	R128	0.144772	0.0004254	-99.7062	0.00467146	0.921508	0.239124	-74.0508	0.219227	21.2823	22.1796	4.216	4.07128	8.59901	2.50772	-70.8371	0.108368		-1.62216	-1.91642	-18.1399	1.38983	-2.79426	-4.11673	-47.3278	1.83898	1.16551	2.14829	84.3208	2.46973	39.0881	37.6139	-3.77148	1.32088	349.827	844.772	141.483	1.11461
S2	R130	0.230133	0.0008037	-99.6508	0.0140296	3.25137	0.63037	-80.6122	2.03907	12.5143	12.0727	-3.52899	1.30308	27.8226	10.2544	-63.1437	1.43377		-1.55385	-2.79077	-79.6037	1.93871	-3.48322	-4.33957	-24.585	2.41649	1.70383	1.67176	-1.88182	2.80958	42.2361	40.9755	-2.98456	1.55482	628.638	763.011	21.3752	1.80909
S2	R138	0.0698275	9.33e-05	-99.8664	0.000494174	0.943316	0.254497	-73.021	0.238842	27.1883	28.726	5.65569	6.73619	8.23321	2.1704	-73.6385	0.0898009		-1.90906	-2.20332	-15.4138	1.8805	-2.90689	-4.8874	-68.1314	2.27125	1.05264	2.50834	138.291	2.60439	33.7689	34.5436	2.29424	1.04799	351.676	822.284	133.818	1.09067
S2	R144	0.0553596	2.92e-05	-99.9473	0.000122616	0.444547	0.159455	-64.1309	0.0705223	17.5781	18.93	7.69032	2.86999	7.2735	1.82373	-74.9264	0.0666616		-1.54019	-1.94374	-26.2015	1.33841	-3.05071	-4.37317	-43.3494	2.13282	1.4521	2.35605	62.251	3.3746	48.271	49.3269	2.18734	2.13915	408.078	583.716	43.0403	0.898409
S2	R154	0.0961669	0.0019461	-97.9763	0.0141959	0.998067	0.423294	-57.5886	0.420313	26.166	25.2169	-3.62733	5.69098	8.26441	2.60756	-68.4483	0.108297		-1.75878	-2.36726	-34.5967	1.86138	-2.89587	-3.58771	-23.8905	1.66094	1.05434	1.35726	28.7319	1.41151	47.3525	44.9787	-5.013	1.91347	531.273	1072.06	101.791	2.14816
S2	R160	0.0990532	0.0003135	-99.6835	0.00235547	0.991911	0.540392	-45.5201	0.533277	15.3464	15.2568	-0.583708	2.01942	9.7008	4.02427	-58.5161	0.196185		-1.19864	-3.08808	-157.631	1.65484	-2.51422	-3.35945	-33.618	1.35029	1.13491	0.710875	-37.3627	0.795781	35.6411	31.7345	-10.9608	1.01614	615.867	584.308	-5.12426	1.35725
S2	R164	0.0157173	0	-100	0	0.488702	0.298423	-38.9356	0.145093	16.9823	18.6789	9.99046	2.73593	7.63225	2.37861	-68.8347	0.091232		-1.33526	-2.40824	-80.3573	1.43762	-1.83623	-4.43365	-141.454	1.30151	0.617398	1.95487	216.63	1.19048	27.8607	29.6699	6.49389	0.742642	378.607	928.251	145.175	1.32551
S2	R165	0.230147	0.0039867	-98.2678	0.0695969	2.43155	1.42663	-41.3285	3.45116	22.8553	24.3857	6.69606	4.80707	15.1805	6.98478	-53.9883	0.532855		-1.45822	-1.34262	7.92714	0.875295	-2.51793	-2.82591	-12.2314	1.13752	1.03623	1.58547	53.0047	1.62052	36.6582	44.5958	21.653	1.46871	342.754	705.23	105.754	0.911681
S2	R174	0.0151386	0	-100	0	0.580569	0.346575	-40.3043	0.200181	19.2807	21.5635	11.8396	3.58593	7.78243	2.36915	-69.5577	0.0926572		-1.70413	-1.79346	-5.24203	1.36639	-1.67898	-3.52239	-109.794	0.945455	0.181422	1.68639	829.539	0.301778	41.0862	34.4506	-16.1502	1.27164	264.848	438.92	65.725	0.438442
S2	R175	0.0614365	0.0001332	-99.7832	0.00062073	1.2306	0.585819	-52.3959	0.717221	21.2407	21.8444	2.84197	4.00192	9.57663	3.7836	-60.4913	0.182091		-1.74512	-2.62904	-50.6513	2.05116	-2.10581	-4.64644	-120.649	1.56422	0.485412	1.85403	281.949	0.887702	43.9284	42.7438	-2.6967	1.68691	598.697	535.069	-10.6277	1.20822
S2	R190	0.0151386	0	-100	0	1.51683	0.913533	-39.7737	1.37858	20.194	22.5114	11.4755	3.92087	11.7692	4.78599	-59.3346	0.283068		-1.4309	-3.22795	-125.59	2.06497	-2.43164	-5.60485	-130.497	2.17882	1.02382	2.25291	120.05	2.27513	30.3636	36.6595	20.7349	1.00003	318.751	689.058	116.174	0.828393
S2	R191	0.0151386	0	-100	0	1.57866	0.892885	-43.4404	1.40235	22.2506	22.4413	0.857308	4.30673	12.6038	6.09332	-51.6551	0.385948		-1.58117	-2.17599	-37.6187	1.53821	-1.99913	-4.18527	-109.355	1.33759	0.54951	1.93624	252.358	1.04949	34.1122	43.118	26.4007	1.32142	698.112	349.352	-49.9576	0.91985
S2	R206	0.0335182	0	-100	0	1.26695	1.69568	33.8391	2.13735	15.8883	17.8132	12.1152	2.44105	12.3618	7.68459	-37.8362	0.477392		-1.5741	-1.56121	0.818565	1.09868	-2.41631	-3.84397	-59.0846	1.48488	0.938512	2.19942	134.352	2.03605	32.9823	34.8742	5.73623	1.03337	770.029	1136.74	47.6234	3.3014
T1	R014	0.0932656	0.0001972	-99.7886	0.00139508	1.0049	0.966362	-3.83539	0.966129	11.4008	12.0079	5.32521	1.18076	11.4586	7.38183	-35.5785	0.425078		-1.29428	-2.27162	-75.513	1.31444	-2.87733	-4.07641	-41.6734	1.8751	1.46235	1.86381	27.4529	2.6884	36.6745	36.7183	0.119511	1.20981	799.836	1397.4	74.7111	4.21553
T1	R015	0.120755	0.000319	-99.7358	0.00292191	0.98532	1.04431	5.98679	1.02371	9.93417	10.9405	10.1302	0.937405	15.0201	10.5392	-29.833	0.795524		-1.64948	-1.46558	11.1492	1.08077	-2.3838	-3.11676	-30.7478	1.18776	0.784724	1.68867	115.193	1.30708	33.9488	36.399	7.21731	1.11016	423.399	1067.95	152.233	1.70542
T1	R022	0.109254	0.000268	-99.7547	0.00222097	0.652562	0.725043	11.1071	0.470713	10.1522	12.5064	23.1895	1.09509	12.2348	5.83586	-52.3012	0.358818		-1.34892	-2.20332	-63.3388	1.32875	-2.53997	-3.97211	-56.384	1.6129	1.14888	1.80651	57.2408	2.04718	39.0589	36.6177	-6.25015	1.28494	511.785	704.893	37.7322	1.36063
T1	R024	0.08227	0.0001484	-99.8196	0.000926077	0.778931	0.659565	-15.3243	0.511125	6.14561	7.52589	22.4595	0.398916	16.7655	9.44283	-43.6769	0.79559		-1.4309	-1.75248	-22.4742	1.12108	-1.83811	-3.07832	-67.4718	0.904574	0.500469	1.40442	180.62	0.693289	20.7444	28.086	35.3909	0.523435	323.161	719.341	122.595	0.876766
T1	R025	0.0895206	0.0039422	-95.5963	0.0267691	0.441995	0.530127	19.9396	0.233114	5.37993	6.60384	22.7494	0.30643	11.1772	6.69715	-40.082	0.376179		-1.72448	-3.00936	-74.5081	2.32013	-3.08269	-6.28807	-103.98	3.09888	1.37642	2.99441	117.551	4.0654	29.0629	32.1848	10.7422	0.840351	382.849	1599.14	317.694	2.30909
T1	R029	0.113521	0.0002869	-99.7473	0.00247046	1.23977	1.77107	42.8549	2.18447	10.1414	10.5441	3.97102	0.922292	14.947	13.3342	-10.7901	1.0016		-1.62216	-3.07767	-89.7267	2.232	-2.34051	-4.49924	-92.2331	1.68348	0.727598	1.4739	102.571	1.05779	49.5462	46.7001	-5.74426	2.07874	465.758	662.179	42.1723	1.16323
T1	R031	0.119019	0.0003113	-99.7384	0.00281038	0.997705	0.896991	-10.0946	0.890351	6.13959	7.13196	16.1635	0.377665	19.4034	12.8516	-33.7661	1.25316		-1.13034	-2.3536	-108.221	1.18937	-1.92789	-4.11404	-113.396	1.26797	0.837918	1.77143	111.408	1.46408	31.6075	35.3845	11.9499	1.00479	420.848	1255.7	198.375	1.99316
T1	R032	0.0446533	0	-100	0	0.716415	0.337094	-52.9471	0.240263	3.83197	5.27067	37.5446	0.174199	21.2446	9.07604	-57.2784	0.968984		-1.44251	-2.5312	-75.4719	1.63239	-1.99692	-4.84196	-142.471	1.54575	0.711691	2.1848	206.987	1.53371	25.7007	35.7296	39.0221	0.824983	335.757	1055.08	214.24	1.3361
T1	R036	0.0506198	8.2e-06	-99.9838	3.14852e-05	1.58648	1.00656	-36.5537	1.58872	6.01263	7.09075	17.9309	0.367718	62.2909	29.1694	-53.1723	9.13111		-1.64929	-2.38092	-44.3603	1.75558	-2.48757	-4.3344	-74.242	1.7237	0.883963	1.91916	117.108	1.67334	23.8723	23.5513	-1.34474	0.505103	329.73	535.208	62.3172	0.665596
T1	R038	0.148823	0.0004434	-99.7021	0.00500537	1.74995	1.08794	-37.8302	1.89409	12.8444	12.9619	0.914704	1.43595	15.1626	8.47491	-44.1066	0.645775		-1.73145	-2.21698	-28.0413	1.71613	-2.51605	-4.90783	-95.0613	1.97408	0.887303	2.50065	181.826	2.18859	36.4688	29.9795	-17.7942	0.982238	257.791	1052.5	308.274	1.02334
T1	R043	0.0151386	0	-100	0	0.552623	0.448412	-18.8575	0.246534	5.08496	4.96392	-2.38035	0.217706	14.316	10.4561	-26.9619	0.752252		-1.76208	-1.80712	-2.55641	1.42361	-2.86066	-4.66295	-63.0026	2.13248	1.13144	2.65977	135.078	2.96835	30.4785	24.6751	-19.041	0.675653	497.442	1097.87	120.703	2.05979
T1	R047	0.0151386	0	-100	0	0.444792	0.284237	-36.0966	0.125779	9.86152	13.077	32.6061	1.11227	12.0647	8.23014	-31.7835	0.498995		-1.49558	-1.38361	7.48705	0.925127	-2.59239	-3.79147	-46.2539	1.57132	1.15673	2.32272	100.801	2.65015	26.7724	34.114	27.4224	0.820523	370.537	774.609	109.05	1.08254
T1	R051	0.0553596	2.92e-05	-99.9473	0.000122616	2.48839	0.510669	-79.4779	1.26424	3.72004	4.42283	18.892	0.141908	50.5385	20.1959	-60.0386	5.12929		-1.92272	-2.08036	-8.1988	1.78827	-3.32301	-4.00114	-20.407	2.12556	1.31689	1.93511	46.9452	2.51361	44.2647	40.2829	-8.99536	1.60196	610.103	831.734	36.327	1.91389
T1	R058	0.110338	0.0002728	-99.7528	0.00228318	0.674047	0.400613	-40.566	0.26865	3.36631	3.70377	10.0245	0.107537	46.2953	34.2612	-25.9941	7.97097		-1.85441	-2.10768	-13.6579	1.74739	-3.02436	-3.72991	-23.3287	1.80339	1.11289	1.68184	51.1242	1.84619	43.0012	42.1679	-1.93776	1.62905	280.037	505.675	80.5744	0.534091
T1	R059	0.0785083	0.0001318	-99.8321	0.000784879	0.466859	0.389071	-16.662	0.180711	4.82673	5.16988	7.10952	0.215225	10.7566	7.12405	-33.7704	0.3851		-1.77244	-2.49022	-40.4964	1.97327	-2.30046	-4.59628	-99.7982	1.69036	0.634769	2.01165	216.911	1.25953	18.5766	26.8515	44.545	0.448131	559.049	1516.25	171.22	3.19706
T1	R093	0.269775	0.0009794	-99.637	0.0200416	1.08424	0.431362	-60.2152	0.465305	7.35446	9.56489	30.0556	0.606721	24.619	10.9557	-55.4989	1.35545		-2.00469	-2.74979	-37.1677	2.46448	-2.41712	-4.12345	-70.5931	1.59337	0.479511	1.41302	194.679	0.668323	29.1168	30.2626	3.93519	0.791627	350.851	740.585	111.083	0.980002
T1	R094	0.126858	0.0064225	-94.9373	0.0618009	0.757506	0.541774	-28.4792	0.408296	3.73253	4.86256	30.275	0.15654	19.0393	11.1994	-41.1774	1.07157		-0.993717	-2.69514	-171.218	1.19735	-2.14778	-3.92265	-82.6374	1.34687	1.0778	1.37088	27.1922	1.4574	32.8956	39.9224	21.3608	1.17985	540.746	1200.75	122.055	2.44893
T1	R099	0.138406	0.0003972	-99.713	0.00416999	0.960878	0.913204	-4.9615	0.872985	6.53117	7.57072	15.9167	0.426468	34.0551	21.3556	-37.2911	3.65482		-1.3216	-2.05304	-55.3447	1.21304	-2.276	-4.05087	-77.9819	1.47394	0.981384	1.97401	101.145	1.91086	33.9214	29.7148	-12.4012	0.905562	323.615	744.946	130.195	0.909251
T1	R102	0.450046	0.0017783	-99.6049	0.0607062	1.80647	1.92802	6.72859	3.46508	7.76488	10.6987	37.7826	0.71651	27.0319	16.613	-38.5428	2.25682		-1.41723	-3.2826	-131.62	2.07988	-2.65771	-5.73496	-115.786	2.43666	1.21888	2.32974	91.1374	2.80097	29.4353	38.5199	30.8627	1.01865	334.7	1823.86	444.925	2.30238
T1	R109	0.63321	0.0025901	-99.591	0.124405	1.69658	2.03282	19.8184	3.43119	6.31655	9.12137	44.4043	0.496934	33.0559	20.641	-37.5573	3.42887		-1.25329	-1.93008	-54.0009	1.08145	-0.80347	-3.04445	-278.913	0.391054	-0.194528	1.1725	702.741	-0.224976	23.3049	31.771	36.3275	0.665196	331.104	1041.65	214.6	1.30082
T1	R114	0.376551	0.0020313	-99.4606	0.0580189	1.05731	1.11047	5.02806	1.16809	5.17831	6.90659	33.3753	0.308468	21.8877	14.1646	-35.2852	1.55803		-1.4309	-2.18966	-53.027	1.40075	-2.23568	-4.13393	-84.9071	1.47751	0.854208	1.9158	124.278	1.61419	30.954	35.2146	13.7642	0.97929	512.169	931.903	81.9523	1.80017
T1	R118	0.0984741	0.0002202	-99.7764	0.00164479	1.47459	0.980449	-33.5105	1.43836	6.85151	8.49234	23.9484	0.501848	22.9862	13.0536	-43.2113	1.50788		-1.97737	-2.74979	-39.0632	2.43089	-2.79399	-4.82934	-72.8471	2.1571	0.853127	2.00339	134.83	1.68586	32.1163	35.4661	10.4301	1.02332	563.721	687.13	21.8918	1.46094
T1	R135	0.0151386	0	-100	0	0.676866	0.405789	-40.0488	0.273259	4.82923	4.85596	0.553462	0.202261	26.3528	38.6043	46.4903	5.11251		-1.82709	-2.08036	-13.8621	1.69932	-2.73405	-3.892	-42.353	1.70113	0.919418	1.81351	97.2459	1.64465	20.46	32.5806	59.2404	0.598877	406.796	1098.49	170.034	1.6854
T1	R141	0.0151386	0	-100	0	0.403322	0.268414	-33.4492	0.107703	3.24299	4.90726	51.3192	0.13726	14.1014	6.19671	-56.056	0.439131		-1.144	-2.21698	-93.7923	1.13387	-2.29078	-4.81966	-110.394	1.76506	1.17964	2.46785	109.203	2.8715	29.7092	32.5754	9.64766	0.869465	541.322	1204.31	122.476	2.4588
T1	R146	0.0857423	0.0001638	-99.809	0.00106532	0.462749	0.455293	-1.61124	0.209608	7.70609	9.61447	24.7646	0.639025	9.17171	4.19541	-54.2571	0.193373		-1.73145	-1.91642	-10.6826	1.48347	-2.99614	-3.7154	-24.0061	1.77961	1.20692	1.83499	52.0393	2.18449	37.1417	37.3542	0.572133	1.24644	607.283	1355.24	123.164	3.10411
T1	R149	0.0695382	9.2e-05	-99.8677	0.00048527	0.942543	0.921098	-2.27523	0.86373	6.47156	9.15082	41.4007	0.510772	20.085	13.0123	-35.2138	1.3134		-1.58117	-2.27163	-43.667	1.60581	-2.09966	-5.05353	-140.683	1.6963	0.685064	2.55458	272.897	1.7262	36.4706	31.0496	-14.8642	1.01735	714.691	603.16	-15.6055	1.62585
T1	R151	0.0213028	0	-100	0	0.632067	0.650632	2.93719	0.409138	4.1329	5.0555	22.3233	0.18021	13.7794	10.1898	-26.0506	0.705618		-1.81847	-2.65916	-46.2306	2.16187	-2.52041	-2.65828	-5.47014	1.0711	0.651084	0.793656	21.8976	0.509695	25.4288	32.0331	25.9715	0.731806	279.439	858.951	207.384	0.905285
T1	R156	0.125095	0.0003382	-99.7296	0.00320912	0.424025	0.25842	-39.0555	0.109016	2.99038	4.30003	43.7955	0.110906	13.309	7.28728	-45.2456	0.487398		-1.4992	-1.58854	-5.95856	1.06472	-2.39643	-2.32055	3.16642	0.889023	0.846397	0.971978	14.8371	0.811468	19.8602	17.5202	-11.7825	0.312604	318.148	906.889	185.052	1.08821
T1	R169	0.0498617	4.8e-06	-99.9904	1.81543e-05	0.712661	1.18043	65.6368	0.836939	14.246	18.2174	27.8778	2.2384	9.5008	5.02989	-47.0582	0.240154		-1.17132	-2.13501	-82.2734	1.11803	-2.47707	-4.33419	-74.9727	1.71634	1.27657	2.16081	69.267	2.72084	33.0788	35.529	7.40714	1.05585	326.635	923.267	182.66	1.13742
T1	R170	0.0617255	5.74e-05	-99.907	0.00026875	0.987421	1.69358	71.5154	1.66371	12.142	14.8574	22.3636	1.55593	11.8791	8.46096	-28.7745	0.505098		-1.11667	-1.79346	-60.6076	0.895357	-2.74722	-3.85034	-40.1538	1.69103	1.53058	2.07983	35.885	3.13997	30.9366	38.5256	24.5308	1.07076	520.425	809.888	55.6205	1.58969
T1	R179	0.0213028	0	-100	0	0.501339	0.557348	11.1719	0.27799	10.1874	12.5091	22.7907	1.09913	9.2969	4.23969	-54.3967	0.198081		-0.953758	-1.83445	-92.3388	0.782206	-0.906677	-3.22809	-256.035	0.467903	0.210452	1.43748	583.045	0.298398	39.291	42.7215	8.731	1.50803	409.8	520.077	26.9097	0.803839
T1	R181	0.0978528	0.0002175	-99.7777	0.00161437	1.21244	1.1367	-6.24659	1.37113	9.84161	11.4974	16.8245	0.975943	14.8862	9.07822	-39.0157	0.679133		-1.25453	-2.47655	-97.4089	1.38901	-1.91857	-4.08592	-112.967	1.25321	0.731087	1.63876	124.154	1.18175	32.0715	30.2664	-5.62848	0.87207	429.962	646.244	50.3026	1.04799
T1	R186	0.103104	0.0002408	-99.7664	0.00188323	0.449631	0.622084	38.3543	0.278276	12.7293	13.6297	7.07408	1.4964	8.19528	4.09019	-50.0909	0.168453		-1.56751	-2.50388	-59.7356	1.7547	-2.97974	-4.31591	-44.8419	2.05593	1.31797	1.84752	40.1786	2.4018	32.8058	42.6999	30.1598	1.25849	513.301	999.241	94.6694	1.93451
T1	R199	0.460473	0.0041394	-99.1011	0.144582	1.78834	1.64255	-8.15214	2.9224	8.77859	11.6644	32.8736	0.883174	22.9214	12.3958	-45.9203	1.42787		-1.10301	-2.69332	-144.178	1.32814	-1.43815	-4.80453	-234.078	1.10462	0.488634	1.97976	305.162	0.954193	40.7078	40.8826	0.429549	1.49516	630.606	1034.84	64.1025	2.46128
T1	R216	0.149112	0.0004447	-99.7018	0.00502981	1.05248	1.17928	12.0473	1.23481	2.86678	4.05872	41.578	0.100356	34.1407	27.1529	-20.4678	4.65865		-1.06203	-3.13232	-194.938	1.48723	-2.43137	-4.86428	-100.063	1.89072	1.27714	1.77712	39.1488	2.2387	28.3635	27.2717	-3.84963	0.694934	765.095	1077.12	40.7823	3.10819
T2	R075	0.0614849	0.0110518	-82.0252	0.0515434	1.34857	0.820812	-39.1345	1.10125	11.5553	13.3177	15.2526	1.3273	14.7901	7.04328	-52.3785	0.523502		-1.62216	-2.14867	-32.4573	1.55826	-1.94429	-4.24011	-118.08	1.31794	0.479288	1.99411	316.056	0.942726	25.2664	34.4859	36.4892	0.782808	380.408	719.54	89.1494	1.03237
T2	R080	0.0383323	0.0100811	-73.7008	0.0293119	0.460606	0.531059	15.2957	0.243357	5.65591	5.90547	4.4124	0.288081	10.7292	7.88027	-26.5529	0.424893		-1.45822	-2.10768	-44.5383	1.37406	-1.95558	-4.1006	-109.687	1.28198	0.614892	1.93266	214.308	1.17218	29.3518	34.2533	16.6992	0.903253	495.017	895.836	80.9707	1.67254
T2	R090	0.209508	0.047877	-77.1479	0.76085	1.36215	0.416091	-69.4533	0.563875	12.5905	11.8058	-6.23301	1.28202	12.1287	4.90739	-59.5389	0.299113		-1.55385	-2.50388	-61.14	1.7394	-3.05796	-4.75058	-55.351	2.3224	1.42345	2.19932	54.5057	3.08796	45.8867	47.7184	3.99187	1.96718	540.713	931.531	72.2784	1.89974
T2	R101	0.440938	0.0358817	-91.8624	1.20011	2.2459	2.93457	30.6636	6.55699	9.09272	12.422	36.6143	0.974186	28.5353	19.3963	-32.0269	2.78146		-1.11667	-2.58585	-131.567	1.29094	-1.83247	-4.96455	-170.922	1.45436	0.815312	2.25131	176.129	1.8105	38.4057	41.8229	8.89771	1.44305	378.332	1101.11	191.043	1.5712
T2	R147	0.157855	0.0239211	-84.8461	0.286424	0.93146	0.52349	-43.799	0.485114	7.87491	9.70388	23.2252	0.659097	13.3597	6.07721	-54.5108	0.408011		-1.5365	-1.90276	-23.837	1.30706	-2.97151	-4.30178	-44.7677	2.04354	1.3781	2.32577	68.7669	3.16146	31.0477	31.0808	0.10661	0.866949	442.924	558.645	26.1266	0.933243
T2	R155	0.215812	0.0340159	-84.2382	0.556839	1.35439	0.942428	-30.4167	1.26988	5.04561	6.05065	19.9191	0.263314	24.2432	15.0604	-37.8776	1.83484		-1.48554	-2.96838	-99.8178	1.97143	-2.15074	-4.07641	-89.5354	1.40159	0.666713	1.22582	83.8595	0.806129	30.2829	39.7386	31.2242	1.08114	863.534	1380.77	59.8974	4.49707

## Sheet: Table S3
Table S3. Searching candidate genes flanking 9 SNPs in Brassica rapa (Br), Brassica napus (Bn) and their ortholog function in Arabidopsis thaliana (At)
SNP Marker	Chromsome	Position	Probe Sequence Position (Br)	Candidate gene (Br)	Chromosome	Position	Distance to significant SNP (Proximity)	Upstream/ Downstream	Probe Sequence Position (Bn)	Candidate gene (Bn)	Chromosome	Position	Distance to significant SNP (Proximity)	Upstream/ Downstream	At ortholog	Gene	Identity (B. rapa)	Identity (B. napus)	Annotation/ function (GO/ At ortholog function)	NCBI BLAST (other species)	Reference	Comments	-	TAIR URL	Genoscope Candidate gene URL	BRAD Candidate gene URL	BRAD Candidate gene Protein Sequence URL
UQnapus1557	A03	5898488	A03; 26365912 - 26365863	Bra019081	A03	26461020 - 26463136	-47855	upstream	A03; 24720658 - 24720707	BnaA03g48330D	A03	24815164 - 24817488	-43971	upstream	AT4G26940	galactosyltransferase family protein	0.8	0.87	transferase activity, transferring glycosyl groups, transferase activity, transferring hexosyl groups; Galactosyltransferase family protein; FUNCTIONS IN: transferase activity, transferring hexosyl groups, transferase activity, transferring glycosyl groups; INVOLVED IN: protein amino acid glycosylation; LOCATED IN: membrane; EXPRESSED IN: 23 plant structures; EXPRESSED DURING: 13 growth stages; C…	-	-	-	-	https://www.arabidopsis.org/servlets/TairObject?type=locus&name=AT4G26940	http://www.genoscope.cns.fr/brassicanapus/cgi-bin/geneView?src=colza;name=BnaA03g48330D	http://brassicadb.org/brad/searchGene.php?ginput=Bra019081	http://brassicadb.org/brad/proteinseq.php?ginput=Bra019081
				Bra019082	A03	26451662 - 26453251	-44447	upstream		BnaA03g48310D	A03	24809659 - 24811870	-40498	upstream	AT4G26850	VTC2 | mannose-1-phosphate guanylyltransferase (GDP)s;GDP-galactose:mannose-1-phosphate guanylyltransferases;GDP-galactose:glucose-1-phosphate guanylyltransferases;GDP-galactose:myoinositol-1-phosphate guanylyltransferases;glucose-1-phosphate guanylyltransferase; GDP-L-GALACTOSE PHOSPHORYLASE, GGP, VITAMIN C DEFECTIVE 2, VTC2	0.8	0.8	GDP-D-glucose phosphorylase activity, GDP-galactose:glucose-1-phosphate guanylyltransferase activity, GDP-galactose:mannose-1-phosphate guanylyltransferase activity, GDP-galactose:myoinositol-1-phosphate guanylyltransferase activity, galactose-1-phosphate guanylyltransferase (GDP) activity, glucose-1-phosphate guanylyltransferase (GDP) activity, mannose-1-phosphate guanylyltransferase (GDP) activ…	-	-	-	-	https://www.arabidopsis.org/servlets/TairObject?type=locus&name=AT4G26850	http://www.genoscope.cns.fr/brassicanapus/cgi-bin/geneView?src=colza;name=BnaA03g48310D	http://brassicadb.org/brad/searchGene.php?ginput=Bra019082	http://brassicadb.org/brad/proteinseq.php?ginput=Bra019082
				Bra019083	A03	26450482 - 26451141	-41944	upstream		BnaA03g48300D	A03	24808626 - 24809586	-38408	upstream	AT4G26840	SUM1, SUMO 1, SUMO1, ATSUMO1; SUMO1 (small ubiquitin-like modifier 1); protein binding / protein tag; ARABIDOPSIS THALIANA SMALL UBIQUITIN-LIKE MODIFIER 1, ATSUMO1, SMALL UBIQUITIN-LIKE MODIFIER 1, SUM1, SUMO 1, SUMO1	0.96	0.96	protein binding; protein tag (protein sumoylation, response to heat); Encodes a small ubiquitin-like modifier (SUMO) polypeptide that becomes covalently attached to various intracellular protein targets, much like ubiquitination, leading to post-translational modification of those targets.	-	-	-	-	https://www.arabidopsis.org/servlets/TairObject?type=locus&name=AT4G26840	http://www.genoscope.cns.fr/brassicanapus/cgi-bin/geneView?src=colza;name=BnaA03g48300D	http://brassicadb.org/brad/searchGene.php?ginput=Bra019083	http://brassicadb.org/brad/proteinseq.php?ginput=Bra019083
				Bra019084	A03	26442310 - 26444059	-40349	upstream		BnaA03g48290D	A03	24803055 - 24804856	-36364	upstream	AT4G26830	O-Glycosyl hydrolases family 17 protein; catalytic/ cation binding / hydrolase, hydrolyzing O-glycosyl compounds;	0.76	0.79	hydrolase activity, hydrolyzing O-glycosyl compounds; O-Glycosyl hydrolases family 17 protein; FUNCTIONS IN: cation binding, hydrolase activity, hydrolyzing O-glycosyl compounds, catalytic activity; INVOLVED IN: carbohydrate metabolic process; LOCATED IN: endomembrane system; EXPRESSED IN: 19 plant structures; EXPRESSED DURING: 9 growth stages; CONTAINS InterPro DOMAIN/s: X8 (InterPro:IPR012946),…	-	-	-	-	https://www.arabidopsis.org/servlets/TairObject?type=locus&name=AT4G26830	http://www.genoscope.cns.fr/brassicanapus/cgi-bin/geneView?src=colza;name=BnaA03g48290D	http://brassicadb.org/brad/searchGene.php?ginput=Bra019084	http://brassicadb.org/brad/proteinseq.php?ginput=Bra019084
				Bra019085	A03	26438599 - 26441680	-38388	upstream		BnaA03g48280D	A03	24795965 - 24802557			AT4G26780	AR192, Co-chaperone GrpE family protein; AR192; adenyl-nucleotide exchange factor/ chaperone binding / protein binding / protein homodimerization; AR192, MGE2, MITOCHONDRIAL GRPE 2	0.7	0.93	copper ion binding (heat acclimation, protein folding, response to heat); unknown function	-	-	-	-	https://www.arabidopsis.org/servlets/TairObject?type=locus&name=AT4G26780	http://www.genoscope.cns.fr/brassicanapus/cgi-bin/geneView?src=colza;name=BnaA03g48280D	http://brassicadb.org/brad/searchGene.php?ginput=Bra019085	http://brassicadb.org/brad/proteinseq.php?ginput=Bra019085
				Bra019086	A03	26427506 - 26435315	-36040	upstream					-31488	upstream	AT5G67010	Integrase-type DNA-binding superfamily protein	0.63		DNA binding, transcription factor activity, sequence-specific DNA binding (regulation of transcription, DNA-templated); encodes a member of the ERF (ethylene response factor) subfamily B-6 of ERF/AP2 transcription factor family. The protein contains one AP2 domain. There are 12 members in this subfamily including RAP2.11.	-	-	-	-	https://www.arabidopsis.org/servlets/TairObject?type=locus&name=AT5G67010		http://brassicadb.org/brad/searchGene.php?ginput=Bra019086	http://brassicadb.org/brad/proteinseq.php?ginput=Bra019086
				Bra019087	A03	26422031 - 26422480	-33619	upstream		BnaA03g48270D	A03	24770816 - 24771265	-29572	upstream	AT2G20350	Integrase-type DNA-binding superfamily protein; AP2 domain-containing transcription factor, putative;	0.65	0.62	DNA binding; transcription factor activity, sequence-specific DNA binding (regulation of transcription, DNA-templated); encodes a member of the ERF (ethylene response factor) subfamily B-6 of ERF/AP2 transcription factor family. The protein contains one AP2 domain. There are 12 members in this subfamily including RAP2.11	-	-	-	-	https://www.arabidopsis.org/servlets/TairObject?type=locus&name=AT2G20350	http://www.genoscope.cns.fr/brassicanapus/cgi-bin/geneView?src=colza;name=BnaA03g48270D	http://brassicadb.org/brad/searchGene.php?ginput=Bra019087	http://brassicadb.org/brad/proteinseq.php?ginput=Bra019087
				Bra019088	A03	26412777 - 26413577	-26775	upstream		BnaA03g48260D	A03	24766441 - 24767736	-23278	upstream	AT4G26710	ATPase, V0 complex, subunit E	0.71	0.92	hydrogen ion transmembrane transporter activity (ATP hydrolysis coupled proton transport); ATPase, V0 complex, subunit E; FUNCTIONS IN: hydrogen ion transmembrane transporter activity; INVOLVED IN: ATP hydrolysis coupled proton transport; LOCATED IN: vacuole; EXPRESSED IN: 24 plant structures; EXPRESSED DURING: 15 growth stages; CONTAINS InterPro DOMAIN/s: ATPase, V0 complex, subunit E (InterPro:…	-	-	-	-	https://www.arabidopsis.org/servlets/TairObject?type=locus&name=AT4G26710	http://www.genoscope.cns.fr/brassicanapus/cgi-bin/geneView?src=colza;name=BnaA03g48260D	http://brassicadb.org/brad/searchGene.php?ginput=Bra019088	http://brassicadb.org/brad/proteinseq.php?ginput=Bra019088
				Bra019089	A03	26410377 - 26412117	-23611	upstream		BnaA03g48250D	A03	24764145 - 24766337	-21652	upstream	AT4G26720	protein phosphatase X 1; PPX1, PPX-1	0.96	0.95	protein serine/threonine phosphatase activity; Encodes catalytic subunit of protein phosphatase X. Expressed at very low levels in A. thaliana flowers, leaves, stems and roots.	-	-	-	-	https://www.arabidopsis.org/servlets/TairObject?type=locus&name=AT4G26720	http://www.genoscope.cns.fr/brassicanapus/cgi-bin/geneView?src=colza;name=BnaA03g48250D	http://brassicadb.org/brad/searchGene.php?ginput=Bra019089	http://brassicadb.org/brad/proteinseq.php?ginput=Bra019089
				Bra019090	A03	26409323 - 26410018	-20129	upstream		BnaA03g48240D	A03	24763246 - 24763941	-14617	upstream	AT2G16030	S-adenosyl-L-methionine-dependent methyltransferases superfamily protein	0.62	0.58	methyltransferase activity (metabolic process)	-	-	-	-	https://www.arabidopsis.org/servlets/TairObject?type=locus&name=AT2G16030	http://www.genoscope.cns.fr/brassicanapus/cgi-bin/geneView?src=colza;name=BnaA03g48240D	http://brassicadb.org/brad/searchGene.php?ginput=Bra019090	http://brassicadb.org/brad/proteinseq.php?ginput=Bra019090
				Bra019091	A03	26408242 - 26409005	-18861	upstream		BnaA03g48220D	A03	24762202 - 24762363	-11574	upstream	AT5G07020	proline-rich family protein (MAINTENANCE OF PSII UNDER HIGH LIGHT 1, MPH1)	0.6		protein binding (regulation of protein complex stability, response to cytokinin); Encodes an integral thylakoid membrane protein that interacts with PSII core complexes and contributes to the maintenance of PSII homeostasis upon exposure to photoinhibitory light conditions by participating in the protection and stabilization of PSII under photoinhibitory stress.	-	-	-	-	https://www.arabidopsis.org/servlets/TairObject?type=locus&name=AT5G07020	http://www.genoscope.cns.fr/brassicanapus/cgi-bin/geneView?src=colza;name=BnaA03g48220D	http://brassicadb.org/brad/searchGene.php?ginput=Bra019091	http://brassicadb.org/brad/proteinseq.php?ginput=Bra019091
				Bra019092	A03	26401141 - 26404311	-15189	upstream		BnaA03g48210D	A03	24756022 - 24759458	-8955	upstream	AT4G26690	SHV3, MRH5, GPDL2; PLC-like phosphodiesterase family protein; GDPDL3, GLYCEROPHOSPHODIESTER PHOSPHODIESTERASE (GDPD) LIKE 3, GLYCEROPHOSPHODIESTERASE-LIKE 2, GPDL2, MRH5, MUTANT ROOT HAIR 5, SHAVEN 3, SHV3;	0.74	0.74	glycerophosphodiester phosphodiesterase activity, kinase activity (cell tip growth, glycerol metabolic process, guard cell morphogenesis, plant-type cell wall cellulose metabolic process, root epidermal cell differentiation, root hair cell differentiation, trichome differentiation):Glycerophosphoryl diester phosphodiesterase-like protein involved in cell wall cellulose accumulation and pectin lin…	-	-	-	-	https://www.arabidopsis.org/servlets/TairObject?type=locus&name=AT4G26690	http://www.genoscope.cns.fr/brassicanapus/cgi-bin/geneView?src=colza;name=BnaA03g48210D	http://brassicadb.org/brad/searchGene.php?ginput=Bra019092	http://brassicadb.org/brad/proteinseq.php?ginput=Bra019092
				Bra019093	A03	26396356 - 26397920	-12579	upstream		BnaA03g48060D	A03	24701846 - 24704553	-5585	upstream	AT5G56500	TCP-1/cpn60 chaperonin family protein (CHAPERONIN-60BETA3, CPN60BETA3)	0.61	0.68	Encodes a subunit of chloroplasts chaperonins that are involved in mediating the folding of newly synthesized, translocated, or stress-denatured proteins	-	-	-	-	https://www.arabidopsis.org/servlets/TairObject?type=locus&name=AT5G56500	http://www.genoscope.cns.fr/brassicanapus/cgi-bin/geneView?src=colza;name=BnaA03g48060D	http://brassicadb.org/brad/searchGene.php?ginput=Bra019093	http://brassicadb.org/brad/proteinseq.php?ginput=Bra019093
				Bra019094	A03	26392241 - 26393764	Gene	Gene		BnaA03g48180D	A03	24744615 - 24746539	-7406	upstream	AT4G26650	RNA-binding (RRM/RBD/RNP motifs) family protein	0.78	0.79	RNA binding, nucleotide binding, nucleic acid binding; RNA-binding (RRM/RBD/RNP motifs) family protein; FUNCTIONS IN: RNA binding, nucleotide binding, nucleic acid binding; EXPRESSED IN: 25 plant structures; EXPRESSED DURING: 15 growth stages; CONTAINS InterPro DOMAIN/s: RNA recognition motif, RNP-1 (InterPro:IPR000504), Nucleotide-binding, alpha-beta plait (InterPro:IPR012677); BEST Arabidopsis …	-	-	-	-	https://www.arabidopsis.org/servlets/TairObject?type=locus&name=AT4G26650	http://www.genoscope.cns.fr/brassicanapus/cgi-bin/geneView?src=colza;name=BnaA03g48180D	http://brassicadb.org/brad/searchGene.php?ginput=Bra019094	http://brassicadb.org/brad/proteinseq.php?ginput=Bra019094
				Bra019095	A03	26375290 - 26384388	1754	downstream		BnaA03g48160D	A03	24731548 - 24734627	10094	downstream	AT4G26640	WRKY family transcription factor family protein (WRKY20, AtWRKY20)	0.72	0.71	transcription factor activity, sequence-specific DNA binding (positive regulation of transcription, DNA-templated, regulation of transcription, DNA-templated, response to 1-aminocyclopropane-1-carboxylic acid, response to wounding)	-	-	-	-	https://www.arabidopsis.org/servlets/TairObject?type=locus&name=AT4G26640	http://www.genoscope.cns.fr/brassicanapus/cgi-bin/geneView?src=colza;name=BnaA03g48160D	http://brassicadb.org/brad/searchGene.php?ginput=Bra019095	http://brassicadb.org/brad/proteinseq.php?ginput=Bra019095
				Bra019096	A03	26369960 - 26373055	4097	downstream							AT1G14800	Nucleic acid-binding, OB-fold-like protein	0.6		Unknown	-	-	-	-	https://www.arabidopsis.org/servlets/TairObject?type=locus&name=AT1G14800		http://brassicadb.org/brad/searchGene.php?ginput=Bra019096	http://brassicadb.org/brad/proteinseq.php?ginput=Bra019096
				Bra019097	A03	26367617 - 26368240	9427	downstream		BnaA03g48150D	A03	24730801 - 24731424	10841	downstream	AT3G11060	unknown protein	0.65	0.54	unknown; unknown protein; FUNCTIONS IN: molecular_function unknown; INVOLVED IN: biological_process unknown; LOCATED IN: endomembrane system; EXPRESSED IN: flower; EXPRESSED DURING: petal differentiation and expansion stage; BEST Arabidopsis thaliana protein match is: unknown protein (TAIR:AT3G06545.1)	-	-	-	-	https://www.arabidopsis.org/servlets/TairObject?type=locus&name=AT3G11060	http://www.genoscope.cns.fr/brassicanapus/cgi-bin/geneView?src=colza;name=BnaA03g48150D	http://brassicadb.org/brad/searchGene.php?ginput=Bra019097	http://brassicadb.org/brad/proteinseq.php?ginput=Bra019097
				Bra019098	A03	26360405 - 26366375	26378	downstream		BnaA03g48100D	A03	24711792 - 24713252	23908	downstream	AT4G26590	ATOPT5, OPT5, oligopeptide transporter 5	0.82	0.75	oligopeptide transmembrane transporter activity, oligopeptide transporter activity (oligopeptide transport)	XP_013598718, PREDICTED: peptidyl-prolyl cis-trans isomerase FKBP16-1, chloroplastic [Brassica oleracea var. oleracea]; XP_006413167, hypothetical protein EUTSA_v10026261mg [Eutrema salsugineum]; NP_567750, FKBP-like peptidyl-prolyl cis-trans isomerase family protein [Arabidopsis thaliana]; KFK29175, hypothetical protein AALP_AA7G099000 [Arabis alpina]; XP_006284540, hypothetical protein CARUB_v1…	Tsay et al. 2007; Koh et al. 2002; Bok et al. 2006)	-	-	https://www.arabidopsis.org/servlets/TairObject?type=locus&name=AT4G26590	http://www.genoscope.cns.fr/brassicanapus/cgi-bin/geneView?src=colza;name=BnaA03g48100D	http://brassicadb.org/brad/searchGene.php?ginput=Bra019098	http://brassicadb.org/brad/proteinseq.php?ginput=Bra019098
				Bra019099	A03	26353333 - 26356527	30493	downstream		BnaA03g48110D	A03	24713599 - 24715073	-16105	upstream	AT4G26570	ATCBL3, CBL3, calcineurin B-like 3	0.95	0.96	calcium ion binding, protein binding (detection of calcium ion, potassium ion homeostasis)	XP_013598719, PREDICTED: calcineurin B-like protein 3 isoform X1 [Brassica oleracea var. oleracea]; NP_194387, calcineurin B-like 3 [Arabidopsis thaliana]; XP_010433475, PREDICTED: calcineurin B-like protein 3 [Camelina sativa]; XP_006413165, hypothetical protein EUTSA_v10026170mg [Eutrema salsugineum]; XP_010536758, PREDICTED: calcineurin B-like protein 3 [Tarenaya hassleriana]; AKM45675, calcin…		-	-	https://www.arabidopsis.org/servlets/TairObject?type=locus&name=AT4G26570	http://www.genoscope.cns.fr/brassicanapus/cgi-bin/geneView?src=colza;name=BnaA03g48110D	http://brassicadb.org/brad/searchGene.php?ginput=Bra019099	http://brassicadb.org/brad/proteinseq.php?ginput=Bra019099
				Bra019100	A03	26350723 - 26352978	35278	downstream		BnaA03g48090D	A03	24710096 - 24711703	35315	downstream	AT4G26550	Got1/Sft2-like vescicle transport protein family	0.82	0.82	Unknown; Got1/Sft2-like vescicle transport protein family; FUNCTIONS IN: molecular_function unknown; INVOLVED IN: vesicle-mediated transport; LOCATED IN: cellular_component unknown; EXPRESSED IN: 22 plant structures; EXPRESSED DURING: 13 growth stages; CONTAINS InterPro DOMAIN/s: Vesicle transport protein, Got1/SFT2-like (InterPro:IPR007305), Vesicle transport protein, SFT2-like (InterPro:IPR0116…	-	-	-	-	https://www.arabidopsis.org/servlets/TairObject?type=locus&name=AT4G26550	http://www.genoscope.cns.fr/brassicanapus/cgi-bin/geneView?src=colza;name=BnaA03g48090D	http://brassicadb.org/brad/searchGene.php?ginput=Bra019100	http://brassicadb.org/brad/proteinseq.php?ginput=Bra019100
				Bra019101	A03	26347051 - 26349508	42379	downstream		BnaA03g48080D	A03	24706101 - 24709084	41495	downstream	AT4G26480	RNA-binding KH domain-containing protein	0.85	0.85	nucleic acid binding; RNA-binding KH domain-containing protein; FUNCTIONS IN: RNA binding, nucleic acid binding; LOCATED IN: cellular_component unknown; EXPRESSED IN: 22 plant structures; EXPRESSED DURING: 13 growth stages; CONTAINS InterPro DOMAIN/s: K Homology (InterPro:IPR004087); BEST Arabidopsis thaliana protein match is: RNA-binding KH domain-containing protein (TAIR:AT5G56140.1)	-	-	-	-	https://www.arabidopsis.org/servlets/TairObject?type=locus&name=AT4G26480	http://www.genoscope.cns.fr/brassicanapus/cgi-bin/geneView?src=colza;name=BnaA03g48080D	http://brassicadb.org/brad/searchGene.php?ginput=Bra019101	http://brassicadb.org/brad/proteinseq.php?ginput=Bra019101
				Bra019102	A03	26345783 - 26346617	43460	downstream		BnaA03g48070D	A03	24705123 - 24706041	42539	downstream	AT4G26470	Calcium-binding EF-hand family protein	0.9	0.88	calcium ion binding; Calcium-binding EF-hand family protein; FUNCTIONS IN: calcium ion binding; INVOLVED IN: N-terminal protein myristoylation; LOCATED IN: cytoplasm; EXPRESSED IN: 8 plant structures; EXPRESSED DURING: L mature pollen stage, M germinated pollen stage, 4 anthesis, petal differentiation and expansion stage; CONTAINS InterPro DOMAIN/s: EF-Hand 1, calcium-binding site (InterPro:IPR01…	-	-	-	-	https://www.arabidopsis.org/servlets/TairObject?type=locus&name=AT4G26470	http://www.genoscope.cns.fr/brassicanapus/cgi-bin/geneView?src=colza;name=BnaA03g48070D	http://brassicadb.org/brad/searchGene.php?ginput=Bra019102	http://brassicadb.org/brad/proteinseq.php?ginput=Bra019102
				Bra019103	A03	26342301 - 26342744	44514	downstream		BnaA03g48050D	A03	24697931 - 24699006	43438	downstream	AT4G26466	LRE; LRE, lorelei	0.62	0.65	unknown (double fertilization forming a zygote and endosperm, pollen tube guidance, pollen tube reception, synergid death); Encodes a membrane localized (putative GPI-anchored) protein involved in fertilization. Loss of function mutations display defects in fertilization-around 25% of embryo sacs abort.	-	-	-	-	https://www.arabidopsis.org/servlets/TairObject?type=locus&name=AT4G26466	http://www.genoscope.cns.fr/brassicanapus/cgi-bin/geneView?src=colza;name=BnaA03g48050D	http://brassicadb.org/brad/searchGene.php?ginput=Bra019103	http://brassicadb.org/brad/proteinseq.php?ginput=Bra019103
				Bra019104	A03	26339137 - 26341526	46914	downstream		BnaA03g48040D	A03	24694395 - 24697380	45734	downstream	AT4G26450	unknown protein	0.7	0.69	unknown	-	-	-	-	https://www.arabidopsis.org/servlets/TairObject?type=locus&name=AT4G26450	http://www.genoscope.cns.fr/brassicanapus/cgi-bin/geneView?src=colza;name=BnaA03g48040D	http://brassicadb.org/brad/searchGene.php?ginput=Bra019104	http://brassicadb.org/brad/proteinseq.php?ginput=Bra019104
				Bra019105	A03	26332293 - 26334136	56168	downstream		BnaA03g48030D	A03	24689243 - 24691086	50109	downstream	AT4G26440	WRKY34, ATWRKY34, MSP3, WRKY DNA-binding protein 34; transcription factor; ATWRKY34, MICROSPORE-SPECIFIC PROMOTER 3, MSP3, WRK PROTEIN 34, WRK34, WRKY DNA-BINDING PROTEIN 34, WRKY34	0.63	0.66	transcription factor activity, sequence-specific DNA binding; member of WRKY Transcription Factor; Group I	-	-	-	-	https://www.arabidopsis.org/servlets/TairObject?type=locus&name=AT4G26440	http://www.genoscope.cns.fr/brassicanapus/cgi-bin/geneView?src=colza;name=BnaA03g48030D	http://brassicadb.org/brad/searchGene.php?ginput=Bra019105	http://brassicadb.org/brad/proteinseq.php?ginput=Bra019105
				Bra019106	A03	26329872 - 26332063	61643	downstream		BnaA03g48020D	A03	24686773 - 24689170			AT4G26430	CSN6B, COP9 signalosome subunit 6B, CSN6B	0.83	0.85	Unknown (COP9 signalosome assembly, cullin deneddylation, multicellular organism development, protein deneddylation, ubiquitin-dependent protein catabolic process); one of two genes encoding subunit 6 of COP9 signalosome complex	-	-	-	-	https://www.arabidopsis.org/servlets/TairObject?type=locus&name=AT4G26430	http://www.genoscope.cns.fr/brassicanapus/cgi-bin/geneView?src=colza;name=BnaA03g48020D	http://brassicadb.org/brad/searchGene.php?ginput=Bra019106	http://brassicadb.org/brad/proteinseq.php?ginput=Bra019106
				Bra019107	A03	26327524 - 26328425	72736	downstream					75258	downstream	AT2G46870	NGA1; NGA1 (NGATHA1); transcription factor	0.33		transcription factor activity, sequence-specific DNA binding (flower development, leaf development)	-	-	-	-	https://www.arabidopsis.org/servlets/TairObject?type=locus&name=AT2G46870		http://brassicadb.org/brad/searchGene.php?ginput=Bra019107	http://brassicadb.org/brad/proteinseq.php?ginput=Bra019107
				Bra019108	A03	26325563 - 26327271	76447	downstream		BnaA03g48000D	A03	24682470 - 24684294	82348	downstream	AT4G26410	Uncharacterised conserved protein UCP022280; RGS1-HXK1 INTERACTING PROTEIN 1, RHIP1	0.72	0.73	Unknown; Encodes a protein predicted to have a 3-stranded helical structure that interacts with both AtRGS1 and AtHXK1 in planta and is required for some glucose-regulated gene expression.	-	-	-	-	https://www.arabidopsis.org/servlets/TairObject?type=locus&name=AT4G26410	http://www.genoscope.cns.fr/brassicanapus/cgi-bin/geneView?src=colza;name=BnaA03g48000D	http://brassicadb.org/brad/searchGene.php?ginput=Bra019108	http://brassicadb.org/brad/proteinseq.php?ginput=Bra019108
				Bra019109	A03	26323968 - 26324936	84619	downstream		BnaA03g47990D	A03	24680757 - 24682250	87919	downstream	AT4G26400	RING/U-box superfamily protein; zinc finger (C3HC4-type RING finger) family protein;	0.57	0.57	zinc ion binding (response to chitin); RING/U-box superfamily protein; FUNCTIONS IN: zinc ion binding; INVOLVED IN: response to chitin; LOCATED IN: endomembrane system; EXPRESSED IN: 24 plant structures; EXPRESSED DURING: 15 growth stages; CONTAINS InterPro DOMAIN/s: Zinc finger, RING-type (InterPro:IPR001841), Zinc finger, C3HC4 RING-type (InterPro:IPR018957); BEST Arabidopsis thaliana protein m…	-	-	-	-	https://www.arabidopsis.org/servlets/TairObject?type=locus&name=AT4G26400	http://www.genoscope.cns.fr/brassicanapus/cgi-bin/geneView?src=colza;name=BnaA03g47990D	http://brassicadb.org/brad/searchGene.php?ginput=Bra019109	http://brassicadb.org/brad/proteinseq.php?ginput=Bra019109
				Bra019110	A03	26321465 - 26323195	85799	downstream		BnaA03g47980D	A03	24678153 - 24680160	88952	downstream	AT4G26370	antitermination NusB domain-containing protein	0.78	0.77	RNA binding (DNA-templated transcription, termination, regulation of transcription, DNA-templated); antitermination NusB domain-containing protein; FUNCTIONS IN: RNA binding; INVOLVED IN: regulation of transcription, DNA-dependent; LOCATED IN: chloroplast; EXPRESSED IN: 20 plant structures; EXPRESSED DURING: 13 growth stages; CONTAINS InterPro DOMAIN/s: NusB/RsmB/TIM44 (InterPro:IPR006027)	-	-	-	-	https://www.arabidopsis.org/servlets/TairObject?type=locus&name=AT4G26370	http://www.genoscope.cns.fr/brassicanapus/cgi-bin/geneView?src=colza;name=BnaA03g47980D	http://brassicadb.org/brad/searchGene.php?ginput=Bra019110	http://brassicadb.org/brad/proteinseq.php?ginput=Bra019110
				Bra019111	A03	26318057 - 26319493	95157	downstream		BnaA03g47970D	A03	24675251 - 24676687	94457	downstream	AT4G26340	F-box/RNI-like/FBD-like domains-containing protein; F-box family protein	0.5	0.57	Unknown; F-box/RNI-like/FBD-like domains-containing protein; CONTAINS InterPro DOMAIN/s: FBD (InterPro:IPR013596), F-box domain, cyclin-like (InterPro:IPR001810), F-box domain, Skp2-like (InterPro:IPR022364), FBD-like (InterPro:IPR006566), Leucine-rich repeat 2 (InterPro:IPR013101); BEST Arabidopsis thaliana protein match is: F-box/RNI-like/FBD-like domains-containing protein (TAIR:AT4G26350.1)	-	-	-	-	https://www.arabidopsis.org/servlets/TairObject?type=locus&name=AT4G26340	http://www.genoscope.cns.fr/brassicanapus/cgi-bin/geneView?src=colza;name=BnaA03g47970D	http://brassicadb.org/brad/searchGene.php?ginput=Bra019111	http://brassicadb.org/brad/proteinseq.php?ginput=Bra019111
										BnaA03g48010D	A03	24684357 - 24685460	-35198	upstream	AT3G02170	LNG2, longifolia2; LNG2, LONGIFOLIA2, TON1 RECRUITING MOTIF 1, TRM1		0.33	microtubule binding (regulation of monopolar cell growth); Encodes LONGIFOLIA2 (LNG2). Regulates leaf morphology by promoting cell expansion in the leaf-length direction. The LNG2 homologue LNG1 (At5g15580) has similar function.	-	-	-	-	https://www.arabidopsis.org/servlets/TairObject?type=locus&name=AT3G02170	http://www.genoscope.cns.fr/brassicanapus/cgi-bin/geneView?src=colza;name=BnaA03g48010D
										BnaA03g48120D	A03	24715190 - 24716112	-4546	upstream	AT1G48900	Signal recognition particle, SRP54 subunit protein		0.37	7S RNA binding, GTP binding, mRNA binding, GTPase activity, nucleoside-triphosphatase activity, nucleotide binding (SRP-dependent cotranslational protein targeting to membrane, signal sequence recognition)	-	Ascencio-Ibáñez et al. 2008 ; Wang et al. 2008	-	-	https://www.arabidopsis.org/servlets/TairObject?type=locus&name=AT1G48900	http://www.genoscope.cns.fr/brassicanapus/cgi-bin/geneView?src=colza;name=BnaA03g48120D
										BnaA03g48130D	A03	24717786 - 24721296	Gene	Gene	AT4G26555	FKBP-like peptidyl-prolyl cis-trans isomerase family protein		0.8	FK506 binding, peptidyl-prolyl cis-trans isomerase activity ( histone peptidyl-prolyl isomerization, peptidyl-proline modification - protein folding)	XP_013621194, PREDICTED: oligopeptide transporter 5 [Brassica oleracea var. oleracea]; KFK29177, hypothetical protein AALP_AA7G099400 [Arabis alpina]; NP_194389, oligopeptide transporter 5 [Arabidopsis thaliana]; XP_002867556, ATOPT5 [Arabidopsis lyrata subsp. lyrata]; XP_010448244, PREDICTED: oligopeptide transporter 5-like [Camelina sativa]; XP_006401399, hypothetical protein EUTSA_v10012759mg …	He et al. 2004; Goulas et al. 2006; Seok et al. 2014	-	-	https://www.arabidopsis.org/servlets/TairObject?type=locus&name=AT4G26555	http://www.genoscope.cns.fr/brassicanapus/cgi-bin/geneView?src=colza;name=BnaA03g48130D
										BnaA03g48140D	A03	24726941 - 24728418	6234	downstream	AT3G46950	Mitochondrial transcription termination factor family protein		0.41	Unknown	XP_010505697, PREDICTED: signal recognition particle 54 kDa protein 3-like isoform X2 [Camelina sativa]; XP_003568147, PREDICTED: signal recognition particle 54 kDa protein 2 [Brachypodium distachyon]; EMS65890, Signal recognition particle 54 kDa protein 2 [Triticum urartu]; EMT01441, Signal recognition particle 54 kDa protein 2 [Aegilops tauschii]; XP_006654623, PREDICTED: signal recognition par…	Dal Bosco et al. 2003; Kleine 2012	-	-	https://www.arabidopsis.org/servlets/TairObject?type=locus&name=AT3G46950	http://www.genoscope.cns.fr/brassicanapus/cgi-bin/geneView?src=colza;name=BnaA03g48140D
										BnaA03g48170D	A03	24735656 - 24735913	14949	downstream	AT5G54690	GAUT12, LGT6, IRX8 | galacturonosyltransferase 12; GALACTURONOSYLTRANSFERASE 12, GAUT12, IRREGULAR XYLEM 8, IRX8, LGT6		0.88	polygalacturonate 4-alpha-galacturonosyltransferase activity, transferase activity, transferring glycosyl groups, transferase activity, transferring hexosyl groups (carbohydrate biosynthetic process, cell wall organization, glucuronoxylan biosynthetic process, glucuronoxylan metabolic process, xylan biosynthetic process); Encodes a protein with putative galacturonosyltransferase activity. Mutants…	-	-	-	-	https://www.arabidopsis.org/servlets/TairObject?type=locus&name=AT5G54690	http://www.genoscope.cns.fr/brassicanapus/cgi-bin/geneView?src=colza;name=BnaA03g48170D
										BnaA03g48190D	A03	24746716 - 24749164	26009	downstream	AT4G26650	RNA-binding (RRM/RBD/RNP motifs) family protein		0.78	RNA binding, nucleotide binding, nucleic acid binding; RNA-binding (RRM/RBD/RNP motifs) family protein; FUNCTIONS IN: RNA binding, nucleotide binding, nucleic acid binding; EXPRESSED IN: 25 plant structures; EXPRESSED DURING: 15 growth stages; CONTAINS InterPro DOMAIN/s: RNA recognition motif, RNP-1 (InterPro:IPR000504), Nucleotide-binding, alpha-beta plait (InterPro:IPR012677); BEST Arabidopsis …	-	-	-	-	https://www.arabidopsis.org/servlets/TairObject?type=locus&name=AT4G26650	http://www.genoscope.cns.fr/brassicanapus/cgi-bin/geneView?src=colza;name=BnaA03g48190D
										BnaA03g48200D	A03	24751340 - 24752974	30633	downstream	AT5G56500	TCP-1/cpn60 chaperonin family protein (CHAPERONIN-60BETA3, CPN60BETA3)		0.61	Encodes a subunit of chloroplasts chaperonins that are involved in mediating the folding of newly synthesized, translocated, or stress-denatured proteins	-	-	-	-	https://www.arabidopsis.org/servlets/TairObject?type=locus&name=AT5G56500	http://www.genoscope.cns.fr/brassicanapus/cgi-bin/geneView?src=colza;name=BnaA03g48200D
										BnaA03g48230D	A03	24762533 - 24762928	41826	downstream	AT5G07020	proline-rich family protein (MAINTENANCE OF PSII UNDER HIGH LIGHT 1, MPH1)		0.86	protein binding (regulation of protein complex stability, response to cytokinin); Encodes an integral thylakoid membrane protein that interacts with PSII core complexes and contributes to the maintenance of PSII homeostasis upon exposure to photoinhibitory light conditions by participating in the protection and stabilization of PSII under photoinhibitory stress.	-	-	-	-	https://www.arabidopsis.org/servlets/TairObject?type=locus&name=AT5G07020	http://www.genoscope.cns.fr/brassicanapus/cgi-bin/geneView?src=colza;name=BnaA03g48230D
										BnaA03g48320D	A03	24812452 - 24812667	91745	downstream	AT2G28290	SYD, CHR3 | P-loop containing nucleoside triphosphate hydrolases superfamily protein; CHR3, CHROMATIN REMODELING COMPLEX SUBUNIT R 3, SPLAYED, SYD;		0.4	ATPase activity, chromatin binding ( ATP-dependent chromatin remodeling, flower development, organ boundary specification between lateral organs and the meristem, regulation of gene expression, epigenetic, response to wounding); Encodes a SWI2/SNF2-like protein in the SNF2 subclass. Homozygous plants with null mutations exhibit premature termination of the meristem and carpelloid structures from …	-	-	-	-	https://www.arabidopsis.org/servlets/TairObject?type=locus&name=AT2G28290	http://www.genoscope.cns.fr/brassicanapus/cgi-bin/geneView?src=colza;name=BnaA03g48320D
										BnaA03g48340D	A03	24818922 - 24819374	98215	downstream	AT4G26950	Protein of unknown function, DUF584		0.64	Unknown; Protein of unknown function, DUF584; CONTAINS InterPro DOMAIN/s: Protein of unknown function DUF584 (InterPro:IPR007608); BEST Arabidopsis thaliana protein match is: Protein of unknown function, DUF584 (TAIR:AT4G04630.1)	-	-	-	-	https://www.arabidopsis.org/servlets/TairObject?type=locus&name=AT4G26950	http://www.genoscope.cns.fr/brassicanapus/cgi-bin/geneView?src=colza;name=BnaA03g48340D
UQnapus1661	A03	18737164	A03; 13512536 - 13512585	Bra000835	A03	13431923 - 13433340	-80613	upstream	A03; 12632827 - 12632876	BnaA03g25690D	A03	12527555 - 12531452	-105272	upstream	AT4G03340.1	-	0.93	0.85	Core-2/I-branching beta-1,6-N-acetylglucosaminyltransferase family protein; FUNCTIONS IN: transferase activity, transferring glycosyl groups, acetylglucosaminyltransferase activity; INVOLVED IN: carbohydrate biosynthetic process; LOCATED IN: mitochondrion, membrane; EXPRESSED IN: 9 plant structures; EXPRESSED DURING: petal differentiation and expansion stage, E expanded cotyledon stage, D bilater…	-	-	-	-	https://www.arabidopsis.org/servlets/TairObject?type=locus&name=AT4G03340	http://www.genoscope.cns.fr/brassicanapus/cgi-bin/geneView?src=colza;name=BnaA03g25690D
				Bra000836	A03	13438981 - 13439445	-73555	upstream		BnaA03g25700D	A03	12539232 - 12539696	-93595	upstream	AT4G03290.1	-	0.88	0.89	EF hand calcium-binding protein family; FUNCTIONS IN: calcium ion binding; INVOLVED IN: response to cold; LOCATED IN: nucleus, cytoplasm; EXPRESSED IN: 9 plant structures; EXPRESSED DURING: L mature pollen stage, M germinated pollen stage, 4 anthesis, C globular stage, petal differentiation and expansion stage; CONTAINS InterPro DOMAIN/s: EF-Hand 1, calcium-binding site (InterPro:IPR018247), EF-H…	-	-	-	-	https://www.arabidopsis.org/servlets/TairObject?type=locus&name=AT4G03290	http://www.genoscope.cns.fr/brassicanapus/cgi-bin/geneView?src=colza;name=BnaA03g25700D
				Bra000837	A03	13440823 - 13441955	-71713	upstream		BnaA03g25710D	A03	12540907 - 12542333	-91920	upstream	AT4G03280.1	-	0.83	0.83	Encodes the Rieske FeS center of cytochrome b6f complex. Gene is expressed in shoot but not in root. Mutant has reduced electron transport at saturating light intensities and Q-cycle activity is hypersensitive to acidification of the thylakoid lumen. The mRNA is cell-to-cell mobile.	-	-	-	-	https://www.arabidopsis.org/servlets/TairObject?type=locus&name=AT4G03280	http://www.genoscope.cns.fr/brassicanapus/cgi-bin/geneView?src=colza;name=BnaA03g25710D
				Bra000838	A03	13444508 - 13446205	-68028	upstream		BnaA03g25720D	A03	12542576 - 12543284	-90251	upstream	AT4G03270.1	-	0.68	0.64	Cyclin D6;1 (CYCD6;1); FUNCTIONS IN: cyclin-dependent protein kinase activity; INVOLVED IN: regulation of cell cycle; LOCATED IN: nucleus; EXPRESSED IN: 11 plant structures; EXPRESSED DURING: F mature embryo stage, 4 leaf senescence stage, petal differentiation and expansion stage, E expanded cotyledon stage, D bilateral stage; CONTAINS InterPro DOMAIN/s: Cyclin, C-terminal (InterPro:IPR004367), …	-	-	-	-	https://www.arabidopsis.org/servlets/TairObject?type=locus&name=AT4G03270	http://www.genoscope.cns.fr/brassicanapus/cgi-bin/geneView?src=colza;name=BnaA03g25720D
				Bra000839	A03	13448943 - 13449967	-63593	upstream		BnaA03g25730D	A03	12543907 - 12547926	-88920	upstream	AT4G03260.1	-	0.82	0.66	Outer arm dynein light chain 1 protein; CONTAINS InterPro DOMAIN/s: Leucine-rich repeat (InterPro:IPR001611); BEST Arabidopsis thaliana protein match is: Outer arm dynein light chain 1 protein (TAIR:AT1G78230.1)	-	-	-	-	https://www.arabidopsis.org/servlets/TairObject?type=locus&name=AT4G03260	http://www.genoscope.cns.fr/brassicanapus/cgi-bin/geneView?src=colza;name=BnaA03g25730D
				Bra000840	A03	13455912 - 13457043	-56624	upstream		BnaA03g25740D	A03	12548637 - 12549853	-84190	upstream	AT4G03240.1	-	0.89	0.76	Encodes AtFH, a frataxin homolog. Frataxin is required for the biogenesis of mitochondria in different organisms. AtFH knock-out mutants are lethal. Required for full activity of mitochondrial Fe-S proteins. Deficiency of AtFH induces oxidative stress.	-	-	-	-	https://www.arabidopsis.org/servlets/TairObject?type=locus&name=AT4G03240	http://www.genoscope.cns.fr/brassicanapus/cgi-bin/geneView?src=colza;name=BnaA03g25740D
				Bra000841	A03	13461926 - 13462335	-50610	upstream		BnaA03g25750D	A03	12554763 - 12555307	-78064	upstream	AT4G03220.1	-	0.36	0.43	Protein with RNI-like/FBD-like domains; CONTAINS InterPro DOMAIN/s: F-box domain, cyclin-like (InterPro:IPR001810), FBD (InterPro:IPR013596), F-box domain, Skp2-like (InterPro:IPR022364), FBD-like (InterPro:IPR006566); BEST Arabidopsis thaliana protein match is: F-box/RNI-like superfamily protein (TAIR:AT3G59210.4)	-	-	-	-	https://www.arabidopsis.org/servlets/TairObject?type=locus&name=AT4G03220	http://www.genoscope.cns.fr/brassicanapus/cgi-bin/geneView?src=colza;name=BnaA03g25750D
				Bra000842	A03	13463232 - 13465774	-49304	upstream		BnaA03g25760D	A03	12555364 - 12556659	-77463	upstream	AT4G03210.1	-	0.84	0.92	encodes a member of xyloglucan endotransglucosylase/hydrolases (XTHs) that catalyze the cleavage and molecular grafting of xyloglucan chains function in loosening and rearrangement of the cell wall. Gene is expressed in shoot apex region, flower buds, flower stalks and internodes bearing flowers.	-	-	-	-	https://www.arabidopsis.org/servlets/TairObject?type=locus&name=AT4G03210	http://www.genoscope.cns.fr/brassicanapus/cgi-bin/geneView?src=colza;name=BnaA03g25760D
				Bra000843	A03	13467705 - 13469701	-44831	upstream		BnaA03g25770D	A03	12560293 - 12560686	-72534	upstream	AT4G03200.1	-	0.7	0.81	catalytics; FUNCTIONS IN: catalytic activity; LOCATED IN: chloroplast; EXPRESSED IN: 24 plant structures; EXPRESSED DURING: 13 growth stages; CONTAINS InterPro DOMAIN/s: Protein of unknown function DUF255 (InterPro:IPR004879), Thioredoxin fold (InterPro:IPR012335), Six-hairpin glycosidase-like (InterPro:IPR008928), Thioredoxin-like fold (InterPro:IPR012336)	-	-	-	-	https://www.arabidopsis.org/servlets/TairObject?type=locus&name=AT4G03200	http://www.genoscope.cns.fr/brassicanapus/cgi-bin/geneView?src=colza;name=BnaA03g25770D
				Bra000844	A03	13475094 - 13477163	-37442	upstream		BnaA03g25780D	A03	12560766 - 12561173	-72061	upstream	AT4G03200.1	-	0.69	0.46	catalytics; FUNCTIONS IN: catalytic activity; LOCATED IN: chloroplast; EXPRESSED IN: 24 plant structures; EXPRESSED DURING: 13 growth stages; CONTAINS InterPro DOMAIN/s: Protein of unknown function DUF255 (InterPro:IPR004879), Thioredoxin fold (InterPro:IPR012335), Six-hairpin glycosidase-like (InterPro:IPR008928), Thioredoxin-like fold (InterPro:IPR012336)	-	-	-	-	https://www.arabidopsis.org/servlets/TairObject?type=locus&name=AT4G03200	http://www.genoscope.cns.fr/brassicanapus/cgi-bin/geneView?src=colza;name=BnaA03g25780D
				Bra000845	A03	13479653 - 13481962	-32883	upstream		BnaA03g25790D	A03	12562038 - 12564737	-70789	upstream	AT4G03190.1	-	0.6	0.84	Encodes an F box protein belonging to the TIR1 subfamily. This protein forms SCF complexes with ASK1 and CUL1 and interacts with Aux/IAA proteins in an auxin-dependent manner. It also has sequence similarity to the yeast protein GRR1, which is involved in glucose repression.	-	-	-	-	https://www.arabidopsis.org/servlets/TairObject?type=locus&name=AT4G03190	http://www.genoscope.cns.fr/brassicanapus/cgi-bin/geneView?src=colza;name=BnaA03g25790D
				Bra000846	A03	13486889 - 13491817	-25647	upstream		BnaA03g25800D	A03	12566246 - 12568418	-66581	upstream	AT1G65670.1	-	0.86	0.64	a member of the cytochrome P450 gene family. molecular function unknown.	-	-	-	-	https://www.arabidopsis.org/servlets/TairObject?type=locus&name=AT1G65670	http://www.genoscope.cns.fr/brassicanapus/cgi-bin/geneView?src=colza;name=BnaA03g25800D
				Bra000847	A03	13492936 - 13494533	-19600	upstream		BnaA03g25810D	A03	12569990 - 12571355	-62837	upstream	AT4G03120.1	-	0.72	0.91	C2H2 and C2HC zinc fingers superfamily protein; FUNCTIONS IN: zinc ion binding, nucleic acid binding; LOCATED IN: nucleus; EXPRESSED IN: 23 plant structures; EXPRESSED DURING: 13 growth stages; CONTAINS InterPro DOMAIN/s: Zinc finger, U1-C type (InterPro:IPR013085), Zinc finger, U1-type (InterPro:IPR003604), Zinc finger, C2H2-type matrin (InterPro:IPR000690)	-	-	-	-	https://www.arabidopsis.org/servlets/TairObject?type=locus&name=AT4G03120	http://www.genoscope.cns.fr/brassicanapus/cgi-bin/geneView?src=colza;name=BnaA03g25810D
				Bra000848	A03	13498815 - 13503183	-13721	upstream		BnaA03g25820D	A03	12573377 - 12575801	-59450	upstream	AT4G03100.1	-	0.55	0.74	Rho GTPase activating protein with PAK-box/P21-Rho-binding domain; FUNCTIONS IN: Rac GTPase activator activity; INVOLVED IN: signal transduction; LOCATED IN: intracellular; EXPRESSED IN: 12 plant structures; EXPRESSED DURING: 6 growth stages; CONTAINS InterPro DOMAIN/s: PAK-box/P21-Rho-binding (InterPro:IPR000095), Rho GTPase activation protein (InterPro:IPR008936), RhoGAP (InterPro:IPR000198); B…	-	-	-	-	https://www.arabidopsis.org/servlets/TairObject?type=locus&name=AT4G03100	http://www.genoscope.cns.fr/brassicanapus/cgi-bin/geneView?src=colza;name=BnaA03g25820D
				Bra000849	A03	13510714 - 13513094	-1822	Gene		BnaA03g25830D	A03	12578217 - 12578908	-54610	upstream	AT3G20130.1	-	0.88	0.69	Encodes a member of the CYP705A family of cytochrome P450 enzymes. Mutants show altered gravitropic responses.	-	-	-	-	https://www.arabidopsis.org/servlets/TairObject?type=locus&name=AT3G20130	http://www.genoscope.cns.fr/brassicanapus/cgi-bin/geneView?src=colza;name=BnaA03g25830D
				Bra000850	A03	13515526 - 13516725	2990	downstream		BnaA03g25840D	A03	12579144 - 12579428	-53683	upstream	AT2G24050.1	-	0.83	0.38	Encodes a putative eukaryotic translation initiation factor.	-	-	-	-	https://www.arabidopsis.org/servlets/TairObject?type=locus&name=AT2G24050	http://www.genoscope.cns.fr/brassicanapus/cgi-bin/geneView?src=colza;name=BnaA03g25840D
				Bra000851	A03	13520947 - 13521156	8411	downstream		BnaA03g25850D	A03	12579501 - 12580994	-53326	upstream	AT3G20100.1	-	0.41	0.61	member of CYP705A The mRNA is cell-to-cell mobile.	-	-	-	-	https://www.arabidopsis.org/servlets/TairObject?type=locus&name=AT3G20100	http://www.genoscope.cns.fr/brassicanapus/cgi-bin/geneView?src=colza;name=BnaA03g25850D
				Bra000852	A03	13524982 - 13525233	12446	downstream		BnaA03g25860D	A03	12591793 - 12597079	-41034	upstream	AT4G03080.1	-	0.63	0.89	BRI1 suppressor 1 (BSU1)-like 1 (BSL1); FUNCTIONS IN: protein binding, protein serine/threonine phosphatase activity; LOCATED IN: plasma membrane; EXPRESSED IN: 23 plant structures; EXPRESSED DURING: 13 growth stages; CONTAINS InterPro DOMAIN/s: Serine/threonine protein phosphatase, BSU1 (InterPro:IPR012391), Metallophosphoesterase (InterPro:IPR004843), Galactose oxidase/kelch, beta-propeller (In…	-	-	-	-	https://www.arabidopsis.org/servlets/TairObject?type=locus&name=AT4G03080	http://www.genoscope.cns.fr/brassicanapus/cgi-bin/geneView?src=colza;name=BnaA03g25860D
				Bra000853	A03	13529997 - 13532645	17461	downstream		BnaA03g25870D	A03	12597840 - 12599565	-34987	upstream	AT4G03070.1	-	0.86	0.72	Encodes a possible 2-oxoglutarate-dependent dioxygenase that is involved in glucosinolate biosynthesis. The gene is expressed in all ecotypes examined but the enzymatic activity has not been determined experimentally. In Col, there is one copy of this gene (aka AOP1.1) but Ler contains two copies, AOP1.1 and a tightly linked AOP1.2.	-	-	-	-	https://www.arabidopsis.org/servlets/TairObject?type=locus&name=AT4G03070	http://www.genoscope.cns.fr/brassicanapus/cgi-bin/geneView?src=colza;name=BnaA03g25870D
				Bra000854	A03	13533288 - 13535585	20752	downstream		BnaA03g25880D	A03	12630773 - 12633671	-2054	Gene	AT4G03020.1	-	0.81	0.88	transducin family protein / WD-40 repeat family protein; CONTAINS InterPro DOMAIN/s: WD40 repeat 2 (InterPro:IPR019782), WD40 repeat (InterPro:IPR001680), WD repeat protein 23 (InterPro:IPR017399), G-protein beta WD-40 repeat, region (InterPro:IPR020472), WD40 repeat-like-containing domain (InterPro:IPR011046), WD40-repeat-containing domain (InterPro:IPR017986), WD40/YVTN repeat-like-containing d…	-	-	-	-	https://www.arabidopsis.org/servlets/TairObject?type=locus&name=AT4G03020	http://www.genoscope.cns.fr/brassicanapus/cgi-bin/geneView?src=colza;name=BnaA03g25880D
				Bra000855	A03	13536538 - 13540521	24002	downstream		BnaA03g25890D	A03	12636189 - 12637653	3362	downstream	AT4G02980.1	-	0.87	0.83	Auxin binding protein involved in cell elongation and cell division. ABP1 is ubiquitinated in vitro and in planta by AtRma2. ABP1 was thought to be embryo lethal but further experimentation has demonstrated that lethality is due to a linked mutation in another gene.	-	-	-	-	https://www.arabidopsis.org/servlets/TairObject?type=locus&name=AT4G02980	http://www.genoscope.cns.fr/brassicanapus/cgi-bin/geneView?src=colza;name=BnaA03g25890D
				Bra000856	A03	13541806 - 13543105	29270	downstream		BnaA03g25900D	A03	12641638 - 12642888	8811	downstream	AT4G02970.1	-	0.69	0.41	Signal recognition particle. Type 4 of RNA polymerase III dependent genes.	-	-	-	-	https://www.arabidopsis.org/servlets/TairObject?type=locus&name=AT4G02970	http://www.genoscope.cns.fr/brassicanapus/cgi-bin/geneView?src=colza;name=BnaA03g25900D
				Bra000857	A03	13544282 - 13546517	31746	downstream		BnaA03g25910D	A03	12646028 - 12646999	13201	downstream	AT4G03350.1	-	0.72	0.34	EVE1 encodes a a novel ubiquitin family protein involved in the transition from the vegetative to the reproductive phase of growth.	-	-	-	-	https://www.arabidopsis.org/servlets/TairObject?type=locus&name=AT4G03350	http://www.genoscope.cns.fr/brassicanapus/cgi-bin/geneView?src=colza;name=BnaA03g25910D
				Bra000858	A03	13551676 - 13552924	39140	downstream		BnaA03g25920D	A03	12651893 - 12654842	19066	downstream	AT4G02930.1	-	0.67		GTP binding Elongation factor Tu family protein; FUNCTIONS IN: translation elongation factor activity, cobalt ion binding, zinc ion binding, ATP binding; INVOLVED IN: response to cadmium ion; LOCATED IN: mitochondrion, cell wall; EXPRESSED IN: 27 plant structures; EXPRESSED DURING: 13 growth stages; CONTAINS InterPro DOMAIN/s: Translation elongation factor EFTu/EF1A, bacterial/organelle (InterPro…	-	-	-	-	https://www.arabidopsis.org/servlets/TairObject?type=locus&name=AT4G02930	http://www.genoscope.cns.fr/brassicanapus/cgi-bin/geneView?src=colza;name=BnaA03g25920D
				Bra000859	A03	13555766 - 13557869	43230	downstream		BnaA03g25930D	A03	12655009 - 12657690	22182	downstream	AT4G02920.2	-	0.78	0.8	unknown protein; BEST Arabidopsis thaliana protein match is: unknown protein (TAIR:AT1G03340.1)	-	-	-	-	https://www.arabidopsis.org/servlets/TairObject?type=locus&name=AT4G02920	http://www.genoscope.cns.fr/brassicanapus/cgi-bin/geneView?src=colza;name=BnaA03g25930D
				Bra000860	A03	13558086 - 13558844	45550	downstream		BnaA03g25940D	A03	12658525 - 12662327	25698	downstream	AT4G02900.1	-	0.96	0.87	ERD (early-responsive to dehydration stress) family protein; INVOLVED IN: biological_process unknown; LOCATED IN: endomembrane system, membrane; EXPRESSED IN: 21 plant structures; EXPRESSED DURING: 10 growth stages; CONTAINS InterPro DOMAIN/s: Protein of unknown function DUF221 (InterPro:IPR003864); BEST Arabidopsis thaliana protein match is: ERD (early-responsive to dehydration stress) family pr…	-	-	-	-	https://www.arabidopsis.org/servlets/TairObject?type=locus&name=AT4G02900	http://www.genoscope.cns.fr/brassicanapus/cgi-bin/geneView?src=colza;name=BnaA03g25940D
				Bra000861	A03	13560179 - 13561330	47643	downstream		BnaA03g25950D	A03	12663612 - 12664944	30785	downstream	AT4G00620.1	-	0.68	0.63	Amino acid dehydrogenase family protein; FUNCTIONS IN: binding, catalytic activity; INVOLVED IN: folic acid and derivative biosynthetic process, metabolic process; LOCATED IN: chloroplast; CONTAINS InterPro DOMAIN/s: Tetrahydrofolate dehydrogenase/cyclohydrolase, NAD(P)-binding domain (InterPro:IPR020631), Tetrahydrofolate dehydrogenase/cyclohydrolase (InterPro:IPR000672), NAD(P)-binding domain (…	-	-	-	-	https://www.arabidopsis.org/servlets/TairObject?type=locus&name=AT4G00620	http://www.genoscope.cns.fr/brassicanapus/cgi-bin/geneView?src=colza;name=BnaA03g25950D
				Bra000862	A03	13564963 - 13566263	52427	downstream		BnaA03g25960D	A03	12665455 - 12668281	32628	downstream	AT4G02880.2	-	0.69	0.65	unknown protein; FUNCTIONS IN: molecular_function unknown; INVOLVED IN: biological_process unknown; LOCATED IN: cellular_component unknown; EXPRESSED IN: 24 plant structures; EXPRESSED DURING: 15 growth stages; BEST Arabidopsis thaliana protein match is: unknown protein (TAIR:AT1G03290.2).	-	-	-	-	https://www.arabidopsis.org/servlets/TairObject?type=locus&name=AT4G02880	http://www.genoscope.cns.fr/brassicanapus/cgi-bin/geneView?src=colza;name=BnaA03g25960D
				Bra000863	A03	13568019 - 13570118	55483	downstream		BnaA03g25970D	A03	12668763 - 12670175	35936	downstream	Not found	-	0.82			-	-	-	-	http://www.genoscope.cns.fr/brassicanapus/cgi-bin/geneView?src=colza;name=BnaA03g25970D	http://www.genoscope.cns.fr/brassicanapus/cgi-bin/geneView?src=colza;name=BnaA03g25970D
				Bra000864	A03	13578653 - 13594394	66117	downstream		BnaA03g25980D	A03	12673362 - 12675272	40535	downstream	AT3G19830.1	-	0.78	0.39	NTMC2T5.2; FUNCTIONS IN: molecular_function unknown; INVOLVED IN: biological_process unknown; LOCATED IN: chloroplast; CONTAINS InterPro DOMAIN/s: Protein of unknown function DUF2404, transmembrane (InterPro:IPR019411), C2 membrane targeting protein (InterPro:IPR018029), C2 calcium/lipid-binding domain, CaLB (InterPro:IPR008973), C2 calcium-dependent membrane targeting (InterPro:IPR000008); BEST …	-	-	-	-	https://www.arabidopsis.org/servlets/TairObject?type=locus&name=AT3G19830	http://www.genoscope.cns.fr/brassicanapus/cgi-bin/geneView?src=colza;name=BnaA03g25980D
				Bra000865	A03	13595929 - 13599094	83393	downstream		BnaA03g25990D	A03	12675436 - 12676804	42609	downstream	AT4G02850.1	-	0.62	0.68	DAAR1 encodes a PLP-independent racemase that catalyzes the conversion from L-Ile to D-allo-Ile.	-	-	-	-	https://www.arabidopsis.org/servlets/TairObject?type=locus&name=AT4G02850	http://www.genoscope.cns.fr/brassicanapus/cgi-bin/geneView?src=colza;name=BnaA03g25990D
				Bra000866	A03	13601084 - 13603801	88548	downstream		BnaA03g26000D	A03	12683935 - 12685063	51108	downstream	AT4G02850.1	-	0.49	0.71	DAAR1 encodes a PLP-independent racemase that catalyzes the conversion from L-Ile to D-allo-Ile.	-	-	-	-	https://www.arabidopsis.org/servlets/TairObject?type=locus&name=AT4G02850	http://www.genoscope.cns.fr/brassicanapus/cgi-bin/geneView?src=colza;name=BnaA03g26000D
				Bra000867	A03	13605023 - 13605964	92487	downstream		BnaA03g26010D	A03	12685162 - 12686087	52335	downstream	AT4G02840.2	-	0.84	0.96	SmD1b is one of two Yeast SmD1 orthologs, the other being SmD1a.SmD1b accumulates to higher levels than SmD1a.It is localized to the nucleolus and nuclear speckles and appears to have a role in RNA splicing and indirectly facilitating PTGS.	-	-	-	-	https://www.arabidopsis.org/servlets/TairObject?type=locus&name=AT4G02840	http://www.genoscope.cns.fr/brassicanapus/cgi-bin/geneView?src=colza;name=BnaA03g26010D
				Bra000868	A03	13617887 - 13621140	105351	downstream		BnaA03g26020D	A03	12687353 - 12688604	54526	downstream	AT4G02830.1	-	0.82	0.68	unknown protein	-	-	-	-	https://www.arabidopsis.org/servlets/TairObject?type=locus&name=AT4G02830	http://www.genoscope.cns.fr/brassicanapus/cgi-bin/geneView?src=colza;name=BnaA03g26020D
				Bra000869	A03	13622768 - 13636237	110232	downstream		BnaA03g26030D	A03	12692128 - 12693496	59301	downstream	AT4G02830.1	-	0.75	0.69	unknown protein	-	-	-	-	https://www.arabidopsis.org/servlets/TairObject?type=locus&name=AT4G02830	http://www.genoscope.cns.fr/brassicanapus/cgi-bin/geneView?src=colza;name=BnaA03g26030D
				Bra000870	A03	13640184 - 13641326	127648	downstream		BnaA03g26040D	A03	12695004 - 12697366	62177	downstream	AT4G02790.1	-	0.48	0.85	GTP-binding family protein; FUNCTIONS IN: GTP binding; INVOLVED IN: biological_process unknown; LOCATED IN: intracellular, chloroplast; EXPRESSED IN: 22 plant structures; EXPRESSED DURING: 13 growth stages; CONTAINS InterPro DOMAIN/s: GTP1/OBG (InterPro:IPR006073), GTP-binding protein, HSR1-related (InterPro:IPR002917), GTP-binding protein, ribosome biogenesis, YlqF (InterPro:IPR019991); BEST Ara…	-	-	-	-	https://www.arabidopsis.org/servlets/TairObject?type=locus&name=AT4G02790	http://www.genoscope.cns.fr/brassicanapus/cgi-bin/geneView?src=colza;name=BnaA03g26040D
				Bra000871	A03	13643798 - 13644958	131262	downstream		BnaA03g26050D	A03	12708254 - 12727406	75427	downstream	AT4G02780.1	-	0.96	0.77	Catalyzes the conversion of geranylgeranyl pyrophosphate (GGPP) to copalyl pyrophosphate (CPP) of gibberellin biosynthesis	-	-	-	-	https://www.arabidopsis.org/servlets/TairObject?type=locus&name=AT4G02780	http://www.genoscope.cns.fr/brassicanapus/cgi-bin/geneView?src=colza;name=BnaA03g26050D
				Bra000872	A03	13645700 - 13647623	133164	downstream		BnaA03g26060D	A03	12761678 - 12762115	128851	downstream	Not found	-	0.74			-	-	-	-	http://www.genoscope.cns.fr/brassicanapus/cgi-bin/geneView?src=colza;name=BnaA03g26060D	http://www.genoscope.cns.fr/brassicanapus/cgi-bin/geneView?src=colza;name=BnaA03g26060D
				Bra000873	A03	13648622 - 13650950	136086	downstream		BnaA03g26070D	A03	12764691 - 12764798	131864	downstream	Not found	-	0.96			-	-	-	-	http://www.genoscope.cns.fr/brassicanapus/cgi-bin/geneView?src=colza;name=BnaA03g26070D	http://www.genoscope.cns.fr/brassicanapus/cgi-bin/geneView?src=colza;name=BnaA03g26070D
				Bra000874	A03	13651841 - 13655860	139305	downstream		BnaA03g26080D	A03	12768190 - 12769335	135363	downstream	AT4G39756.1	-	0.92	0.49	Galactose oxidase/kelch repeat superfamily protein; CONTAINS InterPro DOMAIN/s: F-box domain, cyclin-like (InterPro:IPR001810), Galactose oxidase/kelch, beta-propeller (InterPro:IPR011043), Kelch repeat type 1 (InterPro:IPR006652), Kelch related (InterPro:IPR013089), Kelch-type beta propeller (InterPro:IPR015915); BEST Arabidopsis thaliana protein match is: Galactose oxidase/kelch repeat superfam…	-	-	-	-	https://www.arabidopsis.org/servlets/TairObject?type=locus&name=AT4G39756	http://www.genoscope.cns.fr/brassicanapus/cgi-bin/geneView?src=colza;name=BnaA03g26080D
				Bra000875	A03	13661766 - 13662884	149230	downstream		BnaA03g26090D	A03	12772628 - 12774125	139801	downstream	AT4G02620.1	-	0.85	0.96	vacuolar ATPase subunit F family protein; FUNCTIONS IN: hydrogen ion transporting ATP synthase activity, rotational mechanism, proton-transporting ATPase activity, rotational mechanism; INVOLVED IN: ATP synthesis coupled proton transport; LOCATED IN: plasma membrane, vacuole; EXPRESSED IN: 25 plant structures; EXPRESSED DURING: 15 growth stages; CONTAINS InterPro DOMAIN/s: ATPase, V1 complex, sub…	-	-	-	-	https://www.arabidopsis.org/servlets/TairObject?type=locus&name=AT4G02620	http://www.genoscope.cns.fr/brassicanapus/cgi-bin/geneView?src=colza;name=BnaA03g26090D
				Bra000876	A03	13665108 - 13666213	152572	downstream		BnaA03g26100D	A03	12774642 - 12777042	141815	downstream	AT4G02590.1	-	0.79	0.74	unfertilized embryo sac 12 (UNE12); FUNCTIONS IN: DNA binding, sequence-specific DNA binding transcription factor activity; INVOLVED IN: double fertilization forming a zygote and endosperm, regulation of transcription; LOCATED IN: nucleus; EXPRESSED IN: 22 plant structures; EXPRESSED DURING: 13 growth stages; CONTAINS InterPro DOMAIN/s: Helix-loop-helix DNA-binding domain (InterPro:IPR001092), He…	-	-	-	-	https://www.arabidopsis.org/servlets/TairObject?type=locus&name=AT4G02590	http://www.genoscope.cns.fr/brassicanapus/cgi-bin/geneView?src=colza;name=BnaA03g26100D
				Bra000877	A03	13669210 - 13671190	156674	downstream		BnaA03g26110D	A03	12777168 - 12779688	144341	downstream	AT4G02580.1	-	0.89	0.96	NADH-ubiquinone oxidoreductase 24 kDa subunit, putative; FUNCTIONS IN: NADH dehydrogenase (ubiquinone) activity, zinc ion binding; INVOLVED IN: response to oxidative stress, mitochondrial electron transport, NADH to ubiquinone; LOCATED IN: mitochondrion, mitochondrial respiratory chain complex I, respiratory chain complex I; EXPRESSED IN: 24 plant structures; EXPRESSED DURING: 15 growth stages; C…	-	-	-	-	https://www.arabidopsis.org/servlets/TairObject?type=locus&name=AT4G02580	http://www.genoscope.cns.fr/brassicanapus/cgi-bin/geneView?src=colza;name=BnaA03g26110D
				Bra000878	A03	13676462 - 13683499	163926	downstream		BnaA03g26120D	A03	12780206 - 12786543	147379	downstream	AT4G02570.1	-	0.82	0.93	Encodes a cullin that is a component of SCF ubiquitin ligase complexes involved in mediating responses to auxin and jasmonic acid. Homozygous auxin-resistant mutants arrest growth soon after germination, lacking a root and hypocotyl. Heterozygotes display a variety of phenotypes consistent with impaired auxin response.	-	-	-	-	https://www.arabidopsis.org/servlets/TairObject?type=locus&name=AT4G02570	http://www.genoscope.cns.fr/brassicanapus/cgi-bin/geneView?src=colza;name=BnaA03g26120D
										BnaA03g26130D	A03	12791395 - 12792736	158568	downstream	AT2G02930.1	-		0.79	Encodes glutathione transferase belonging to the phi class of GSTs. Naming convention according to Wagner et al. (2002).	-	-	-	-	https://www.arabidopsis.org/servlets/TairObject?type=locus&name=AT2G02930	http://www.genoscope.cns.fr/brassicanapus/cgi-bin/geneView?src=colza;name=BnaA03g26130D
										BnaA03g26140D	A03	12794809 - 12796123	161982	downstream	AT4G02520.1	-		0.8	Encodes glutathione transferase belonging to the phi class of GSTs. Naming convention according to Wagner et al. (2002). The expression of this gene is upregulated by herbicide safeners such as benoxacor and fenclorim.	-	-	-	-	https://www.arabidopsis.org/servlets/TairObject?type=locus&name=AT4G02520	http://www.genoscope.cns.fr/brassicanapus/cgi-bin/geneView?src=colza;name=BnaA03g26140D
										BnaA03g26150D	A03	12796395 - 12798814	163568	downstream	AT4G02500.1	-		0.88	Encodes a protein with xylosyltransferase activity, which is specific for UDP-xylose as donor substrate and for oligosaccharides with a degree of polymerization >4. Although the enzyme utilizes either cellopentaose or cellohexaose, its activity is four-fold higher with cellohexaose as an acceptor compared to cellopentaose. The enzyme is able to add several xylosyl residues to the acceptor forming…	-	-	-	-	https://www.arabidopsis.org/servlets/TairObject?type=locus&name=AT4G02500	http://www.genoscope.cns.fr/brassicanapus/cgi-bin/geneView?src=colza;name=BnaA03g26150D
										BnaA03g26160D	A03	12802111 - 12809174	169284	downstream	AT4G02480.1	-		0.78	AAA-type ATPase family protein; FUNCTIONS IN: nucleoside-triphosphatase activity, ATPase activity, nucleotide binding, ATP binding; LOCATED IN: chloroplast; EXPRESSED IN: 24 plant structures; EXPRESSED DURING: 14 growth stages; CONTAINS InterPro DOMAIN/s: ATPase, AAA+ type, core (InterPro:IPR003593), ATPase, AAA-type, core (InterPro:IPR003959), SMAD/FHA domain (InterPro:IPR008984), ATPase, AAA-ty…	-	-	-	-	https://www.arabidopsis.org/servlets/TairObject?type=locus&name=AT4G02480	http://www.genoscope.cns.fr/brassicanapus/cgi-bin/geneView?src=colza;name=BnaA03g26160D
										BnaA03g26170D	A03	12810471 - 12813089	177644	downstream	AT4G02450.1	-		0.89	Encodes one of two isoforms of a co-chaperone of HSP90 that is required for root growth, in particular in the maintenance of the root meristem.	-	-	-	-	https://www.arabidopsis.org/servlets/TairObject?type=locus&name=AT4G02450	http://www.genoscope.cns.fr/brassicanapus/cgi-bin/geneView?src=colza;name=BnaA03g26170D
UQnapus2563	A05	4109774	A05; 20553618 - 20553569	Bra027189	A05	20322791 - 20324915	-228703	upstream	A05; 18039051 - 18039002	BnaA05g23560D	A05	17801165 - 17803291	-235711	upstream	AT3G16130	ATROPGEF13, ROPGEF13, PIRF2, RHO guanyl-nucleotide exchange factor 13	0.71	0.7	Rho guanyl-nucleotide exchange factor activity (positive regulation of GTPase activity); Encodes a member of KPP-like gene family, homolog of KPP (kinase partner protein) gene in tomato. Also a member of the RopGEF (guanine nucleotide exchange factor) family, containing the novel PRONE domain (plant-specific Rop nucleotide exchanger), which is exclusively active towards members of the Rop subfami…	-	-	-		https://www.arabidopsis.org/servlets/TairObject?type=locus&name=AT3G16130	http://www.genoscope.cns.fr/brassicanapus/cgi-bin/geneView?src=colza;name=BnaA05g23560D	http://brassicadb.org/brad/searchGene.php?ginput=Bra027189	http://brassicadb.org/brad/proteinseq.php?ginput=Bra027189
				Bra027190	A05	20325640 - 20326012	-227606	upstream		BnaA05g23570D	A05	17804004 - 17804568	-234434	upstream	AT3G16120	Dynein light chain type 1 family protein	0.9	0.9	microtubule motor activity (microtubule-based process); Dynein light chain type 1 family protein; FUNCTIONS IN: microtubule motor activity; INVOLVED IN: microtubule-based process; LOCATED IN: microtubule associated complex; EXPRESSED IN: 12 plant structures; EXPRESSED DURING: 6 growth stages; CONTAINS InterPro DOMAIN/s: Dynein light chain, type 1/2 (InterPro:IPR001372); BEST Arabidopsis thaliana …	-	-	-		https://www.arabidopsis.org/servlets/TairObject?type=locus&name=AT3G16120	http://www.genoscope.cns.fr/brassicanapus/cgi-bin/geneView?src=colza;name=BnaA05g23570D	http://brassicadb.org/brad/searchGene.php?ginput=Bra027190	http://brassicadb.org/brad/proteinseq.php?ginput=Bra027190
				Bra027191	A05	20328423 - 20331762	-221856	upstream		BnaA05g23580D	A05	17807020 - 17810272	-228730	upstream	AT3G16110	ARABIDOPSIS THALIANA PROTEIN DISULFIDE ISOMERASE 4, ATPDI4, ATPDIL1-6, PDI-LIKE 1-6, PDI4, PDIL1-6, PROTEIN DISULFIDE ISOMERASE 4	0.61	0.53	protein disulfide isomerase activity (protein folding, response to endoplasmic reticulum stress); Encodes a protein disulfide isomerase-like (PDIL) protein, a member of a multigene family within the thioredoxin (TRX) superfamily. Unlike several other PDI family members, transcript levels for this gene are not up-regulated in response to three different chemical inducers of ER stress (dithiothreit…	-	-	-		https://www.arabidopsis.org/servlets/TairObject?type=locus&name=AT3G16110	http://www.genoscope.cns.fr/brassicanapus/cgi-bin/geneView?src=colza;name=BnaA05g23580D	http://brassicadb.org/brad/searchGene.php?ginput=Bra027191	http://brassicadb.org/brad/proteinseq.php?ginput=Bra027191
				Bra027192	A05	20332447 - 20333260	-220358	upstream		BnaA05g23590D	A05	17810721 - 17811898	-227104	upstream	AT1G52300	Zinc-binding ribosomal protein family protein	0.95	0.95	structural constituent of ribosome (ribosome biogenesis, translation); Zinc-binding ribosomal protein family protein; FUNCTIONS IN: structural constituent of ribosome; INVOLVED IN: translation, ribosome biogenesis; LOCATED IN: cytosolic ribosome, ribosome; EXPRESSED IN: 24 plant structures; EXPRESSED DURING: 15 growth stages; CONTAINS InterPro DOMAIN/s: Ribosomal protein L37e, conserved site (Int…	-	-	-		https://www.arabidopsis.org/servlets/TairObject?type=locus&name=AT1G52300	http://www.genoscope.cns.fr/brassicanapus/cgi-bin/geneView?src=colza;name=BnaA05g23590D	http://brassicadb.org/brad/searchGene.php?ginput=Bra027192	http://brassicadb.org/brad/proteinseq.php?ginput=Bra027192
				Bra027193	A05	20334606 - 20335064	-218554	upstream		BnaA05g23600D	A05	17813121 - 17813579	-225423	upstream	AT3G16070	unknown protein	0.82	0.82	Unknown; unknown protein; BEST Arabidopsis thaliana protein match is: unknown protein (TAIR:AT1G15260.1)	-	-	-		https://www.arabidopsis.org/servlets/TairObject?type=locus&name=AT3G16070	http://www.genoscope.cns.fr/brassicanapus/cgi-bin/geneView?src=colza;name=BnaA05g23600D	http://brassicadb.org/brad/searchGene.php?ginput=Bra027193	http://brassicadb.org/brad/proteinseq.php?ginput=Bra027193
				Bra027194	A05	20335603 - 20339187	-214431	upstream		BnaA05g23610D	A05	17813833 - 17817696	-221306	upstream	AT3G16060	ATP binding microtubule motor family protein	0.86	0.85	microtubule motor activity; ATP binding microtubule motor family protein; FUNCTIONS IN: microtubule motor activity, ATP binding; INVOLVED IN: microtubule-based movement; LOCATED IN: nucleus, plasma membrane; EXPRESSED IN: 22 plant structures; EXPRESSED DURING: 13 growth stages; CONTAINS InterPro DOMAIN/s: Kinesin, motor region, conserved site (InterPro:IPR019821), Kinesin, motor domain (InterPro:…	-	-	-		https://www.arabidopsis.org/servlets/TairObject?type=locus&name=AT3G16060	http://www.genoscope.cns.fr/brassicanapus/cgi-bin/geneView?src=colza;name=BnaA05g23610D	http://brassicadb.org/brad/searchGene.php?ginput=Bra027194	http://brassicadb.org/brad/proteinseq.php?ginput=Bra027194
				Bra027195	A05	20339978 - 20344440	-209178	upstream		BnaA05g23620D	A05	17818286 - 17822812	-216190	upstream	AT3G16030	lectin protein kinase family protein (CES101); CALLUS EXPRESSION OF RBCS 101, CES101, RESISTANCE TO FUSARIUM OXYSPORUM 3, RFO3	0.72	0.71	kinase activity, carbohydrate binding (innate immune response, response to fungus); CALLUS EXPRESSION OF RBCS 101 (CES101); FUNCTIONS IN: in 6 functions; INVOLVED IN: protein amino acid phosphorylation; LOCATED IN: endomembrane system; EXPRESSED IN: 21 plant structures; EXPRESSED DURING: 13 growth stages; CONTAINS InterPro DOMAIN/s: Curculin-like (mannose-binding) lectin (InterPro:IPR001480), PAN…	-	-	-		https://www.arabidopsis.org/servlets/TairObject?type=locus&name=AT3G16030	http://www.genoscope.cns.fr/brassicanapus/cgi-bin/geneView?src=colza;name=BnaA05g23620D	http://brassicadb.org/brad/searchGene.php?ginput=Bra027195	http://brassicadb.org/brad/proteinseq.php?ginput=Bra027195
				Bra027196	A05	20345506 - 20348101	-205517	upstream		BnaA05g23630D	A05	17823792 - 17826459	-212543	upstream	AT3G16000	MAR binding filament-like protein 1 (MFP1)	0.62	0.61	DNA binding; encodes a DNA-binding protein that binds to plastid DNA non-specifically and is associated with nucleoids and thylakoid membranes. The expression of the gene is correlated with the development of thylakoid membranes.	-	-	-		https://www.arabidopsis.org/servlets/TairObject?type=locus&name=AT3G16000	http://www.genoscope.cns.fr/brassicanapus/cgi-bin/geneView?src=colza;name=BnaA05g23630D	http://brassicadb.org/brad/searchGene.php?ginput=Bra027196	http://brassicadb.org/brad/proteinseq.php?ginput=Bra027196
				Bra027197	A05	20348435 - 20352580	-201038	upstream		BnaA05g23640D	A05	17826643 - 17830920	-208082	upstream	AT3G15990	sulfate transporter 3;4, SULTR3;4	0.65	0.9	sulfate transmembrane transporter activity; Encodes sulfate transporter Sultr3;4.	-	-	-		https://www.arabidopsis.org/servlets/TairObject?type=locus&name=AT3G15990	http://www.genoscope.cns.fr/brassicanapus/cgi-bin/geneView?src=colza;name=BnaA05g23640D	http://brassicadb.org/brad/searchGene.php?ginput=Bra027197	http://brassicadb.org/brad/proteinseq.php?ginput=Bra027197
				Bra027198	A05	20363672 - 20368327	-185291	upstream		BnaA05g23650D	A05	17860080 - 17864841	-174161	upstream	AT3G15950	NAI2, DNA topoisomerase-related	0.66	0.66	protein binding (ER body organization, response to salt stress); Similar to TSK-associating protein 1 (TSA1), contains 10 EFE repeats, a novel repeat sequence unique to plants. Expressed preferentially in the roots.Protein is localized to ER bodies- an endoplasmic reticulum derived structure. Loss of function mutations lack ER bodies.	-	-	-		https://www.arabidopsis.org/servlets/TairObject?type=locus&name=AT3G15950	http://www.genoscope.cns.fr/brassicanapus/cgi-bin/geneView?src=colza;name=BnaA05g23650D	http://brassicadb.org/brad/searchGene.php?ginput=Bra027198	http://brassicadb.org/brad/proteinseq.php?ginput=Bra027198
				Bra027199	A05	20370929 - 20371441	-182177	upstream							AT4G14540	"NUCLEAR FACTOR Y, SUBUNIT B3", NF-YB3	0.94		transcription factor activity, sequence-specific DNA binding; "nuclear factor Y, subunit B3" (NF-YB3); FUNCTIONS IN: sequence-specific DNA binding transcription factor activity; INVOLVED IN: regulation of transcription, DNA-dependent; LOCATED IN: nucleus, intracellular; EXPRESSED IN: 21 plant structures; EXPRESSED DURING: 13 growth stages; CONTAINS InterPro DOMAIN/s: Transcription factor, CBFA/NF…	-	-	-		https://www.arabidopsis.org/servlets/TairObject?type=locus&name=AT4G14540		http://brassicadb.org/brad/searchGene.php?ginput=Bra027199	http://brassicadb.org/brad/proteinseq.php?ginput=Bra027199
				Bra027200	A05	20373982 - 20375887	-177731	upstream		BnaA05g23660D	A05	17871624 - 17874631	-164371	upstream	AT3G15940	UDP-Glycosyltransferase superfamily protein	0.8	0.77	transferase activity, transferring glycosyl groups; UDP-Glycosyltransferase superfamily protein; FUNCTIONS IN: transferase activity, transferring glycosyl groups; INVOLVED IN: biosynthetic process; LOCATED IN: chloroplast; EXPRESSED IN: 21 plant structures; EXPRESSED DURING: 13 growth stages; CONTAINS InterPro DOMAIN/s: Glycosyl transferase, group 1 (InterPro:IPR001296); BEST Arabidopsis thaliana…	-	-	-		https://www.arabidopsis.org/servlets/TairObject?type=locus&name=AT3G15940	http://www.genoscope.cns.fr/brassicanapus/cgi-bin/geneView?src=colza;name=BnaA05g23660D	http://brassicadb.org/brad/searchGene.php?ginput=Bra027200	http://brassicadb.org/brad/proteinseq.php?ginput=Bra027200
				Bra027201	A05	20376774 - 20377939	-175679	upstream		BnaA05g23670D	A05	17875337 - 17876795	-162207	upstream	AT3G15870	Fatty acid desaturase family protein	0.66	0.58	oxidoreductase activity; Fatty acid desaturase family protein; FUNCTIONS IN: oxidoreductase activity, oxidoreductase activity, acting on paired donors, with oxidation of a pair of donors resulting in the reduction of molecular oxygen to two molecules of water; INVOLVED IN: oxidation reduction, lipid metabolic process; EXPRESSED IN: sepal; EXPRESSED DURING: petal differentiation and expansion stag…	-	-	-		https://www.arabidopsis.org/servlets/TairObject?type=locus&name=AT3G15870	http://www.genoscope.cns.fr/brassicanapus/cgi-bin/geneView?src=colza;name=BnaA05g23670D	http://brassicadb.org/brad/searchGene.php?ginput=Bra027201	http://brassicadb.org/brad/proteinseq.php?ginput=Bra027201
				Bra027202	A05	20381605 - 20382105	-171513	upstream							AT3G15860	unknown protein	0.88		Unknown; FUNCTIONS IN: molecular_function unknown; INVOLVED IN: biological_process unknown; LOCATED IN: endomembrane system; EXPRESSED IN: pollen tube; CONTAINS InterPro DOMAIN/s: Plant self-incompatibility S1 (InterPro:IPR010264); BEST Arabidopsis thaliana protein match is: Plant self-incompatibility protein S1 family (TAIR:AT5G26090.1)	-	-	-		https://www.arabidopsis.org/servlets/TairObject?type=locus&name=AT3G15860		http://brassicadb.org/brad/searchGene.php?ginput=Bra027202	http://brassicadb.org/brad/proteinseq.php?ginput=Bra027202
				Bra027203	A05	20407606 - 20409476	-144142	upstream		BnaA05g23690D	A05	17896994 - 17899144	-139858	upstream	AT3G15850	FAD5, FADB, JB67, ADS3; FAD5, FATTY ACID DESATURASE 5; 16:0 monogalactosyldiacylglycerol desaturase/ oxidoreductase; FATTY ACID DESATURASE 5, FATTY ACID DESATURASE B	0.79	0.78	16:0 monogalactosyldiacylglycerol desaturase activity, oxidoreductase activity (photoinhibition, unsaturated fatty acid biosynthetic process); Chloroplastic enzyme responsible for the synthesis of 16:1 fatty acids from galactolipids and sulpholipids. Uses ferredoxin as electron donor. The mRNA is cell-to-cell mobile.	-	-	-		https://www.arabidopsis.org/servlets/TairObject?type=locus&name=AT3G15850	http://www.genoscope.cns.fr/brassicanapus/cgi-bin/geneView?src=colza;name=BnaA05g23690D	http://brassicadb.org/brad/searchGene.php?ginput=Bra027203	http://brassicadb.org/brad/proteinseq.php?ginput=Bra027203
				Bra027204	A05	20410130 - 20411629	-141989	upstream		BnaA05g23700D	A05	17899622 - 17901269	-137733	upstream	AT3G15840	PIFI; PIFI; post-illumination chlorophyll fluorescence increase	0.93	0.94	chlororespiration; Encodes a chloroplast-targeted protein localized in the stroma that is a novel component essential for NDH-mediated non-photochemical reduction of the plastoquinone pool in chlororespiratory electron transport.	-	-	-		https://www.arabidopsis.org/servlets/TairObject?type=locus&name=AT3G15840	http://www.genoscope.cns.fr/brassicanapus/cgi-bin/geneView?src=colza;name=BnaA05g23700D	http://brassicadb.org/brad/searchGene.php?ginput=Bra027204	http://brassicadb.org/brad/proteinseq.php?ginput=Bra027204
				Bra027205	A05	20422088 - 20424034	-129584	upstream		BnaA05g23710D	A05	17901798 - 17903744	-135258	upstream	AT3G15820	ROD1 | phosphatidic acid phosphatase-related / PAP2-related; REDUCED OLEATE DESATURATION 1, ROD1	0.75	0.76	diacylglycerol cholinephosphotransferase activity (phosphatidylcholine metabolic process); Functions as phosphatidylcholine:diacylglycerol cholinephosphotransferase, a major reaction for the transfer of 18:1 into phosphatidylcholine for desaturation and also for the reverse transfer of 18:2 and 18:3 into the triacylglycerols synthesis pathway	-	-	-		https://www.arabidopsis.org/servlets/TairObject?type=locus&name=AT3G15820	http://www.genoscope.cns.fr/brassicanapus/cgi-bin/geneView?src=colza;name=BnaA05g23710D	http://brassicadb.org/brad/searchGene.php?ginput=Bra027205	http://brassicadb.org/brad/proteinseq.php?ginput=Bra027205
				Bra027206	A05	20428123 - 20429066	-124552	upstream							AT3G15810	unknown protein (DUF567)	0.89		Unknown; Protein of unknown function (DUF567); CONTAINS InterPro DOMAIN/s: Protein of unknown function DUF567 (InterPro:IPR007612); BEST Arabidopsis thaliana protein match is: Protein of unknown function (DUF567) (TAIR:AT1G80120.1)	-	-	-		https://www.arabidopsis.org/servlets/TairObject?type=locus&name=AT3G15810		http://brassicadb.org/brad/searchGene.php?ginput=Bra027206	http://brassicadb.org/brad/proteinseq.php?ginput=Bra027206
				Bra027207	A05	20429987 - 20434941	-118677	upstream		BnaA05g23720D	A05	17909677 - 17916525	-122477	upstream	AT3G15800	Glycosyl hydrolase superfamily protein	0.77	0.82	hydrolase activity, hydrolyzing O-glycosyl compounds; Glycosyl hydrolase superfamily protein; FUNCTIONS IN: cation binding, hydrolase activity, hydrolyzing O-glycosyl compounds, catalytic activity; INVOLVED IN: carbohydrate metabolic process; LOCATED IN: anchored to membrane; EXPRESSED IN: root; CONTAINS InterPro DOMAIN/s: Glycoside hydrolase, family 17 (InterPro:IPR000490), Glycoside hydrolase, …	-	-	-		https://www.arabidopsis.org/servlets/TairObject?type=locus&name=AT3G15800	http://www.genoscope.cns.fr/brassicanapus/cgi-bin/geneView?src=colza;name=BnaA05g23720D	http://brassicadb.org/brad/searchGene.php?ginput=Bra027207	http://brassicadb.org/brad/proteinseq.php?ginput=Bra027207
				Bra027208	A05	20435713 - 20436200	-117418	upstream		BnaA05g23730D	A05	17917296 - 17917783	-121219	upstream	AT3G15760	unknown protein	0.78	0.75	Unknown; unknown protein; FUNCTIONS IN: molecular_function unknown; INVOLVED IN: biological_process unknown; LOCATED IN: endomembrane system; EXPRESSED IN: 22 plant structures; EXPRESSED DURING: 10 growth stages; BEST Arabidopsis thaliana protein match is: unknown protein (TAIR:AT1G52565.1)	-	-	-		https://www.arabidopsis.org/servlets/TairObject?type=locus&name=AT3G15760	http://www.genoscope.cns.fr/brassicanapus/cgi-bin/geneView?src=colza;name=BnaA05g23730D	http://brassicadb.org/brad/searchGene.php?ginput=Bra027208	http://brassicadb.org/brad/proteinseq.php?ginput=Bra027208
				Bra027209	A05	20440241 - 20443269	-110349	upstream		BnaA05g23740D	A05	17921857 - 17925521	-113481	upstream	AT3G15730	PLDALPHA1, PLD; PLDALPHA1 (phospholipase D alpha 1); phospholipase D;	0.94	0.94	phosphatidylinositol-4,5-bisphosphate binding, protein binding; GTPase activator activity, phospholipase D activity, phospholipase activity (abscisic acid-activated signaling pathway, fatty acid metabolic process, leaf shaping, positive regulation of abscisic acid-activated signaling pathway, regulation of stomatal movement, response to abscisic acid, response to cadmium ion, seed germination); E…	-	-	-		https://www.arabidopsis.org/servlets/TairObject?type=locus&name=AT3G15730	http://www.genoscope.cns.fr/brassicanapus/cgi-bin/geneView?src=colza;name=BnaA05g23740D	http://brassicadb.org/brad/searchGene.php?ginput=Bra027209	http://brassicadb.org/brad/proteinseq.php?ginput=Bra027209
				Bra027210	A05	20448066 - 20450152	-103466	upstream		BnaA05g23750D	A05	17928936 - 17931032	-107970	upstream	AT3G15720	glycoside hydrolase family 28 protein / polygalacturonase (pectinase) family protein; Pectin lyase-like superfamily protein	0.77	0.77	polygalacturonase activity (carbohydrate metabolic process, cell wall organization); Downregulated by response to cyclopentenone; Pectin lyase-like superfamily protein; FUNCTIONS IN: polygalacturonase activity; INVOLVED IN: response to cyclopentenone, carbohydrate metabolic process; LOCATED IN: anchored to plasma membrane, anchored to membrane, plant-type cell wall; EXPRESSED IN: 21 plant structu…	-	-	-		https://www.arabidopsis.org/servlets/TairObject?type=locus&name=AT3G15720	http://www.genoscope.cns.fr/brassicanapus/cgi-bin/geneView?src=colza;name=BnaA05g23750D	http://brassicadb.org/brad/searchGene.php?ginput=Bra027210	http://brassicadb.org/brad/proteinseq.php?ginput=Bra027210
				Bra027211	A05	20453064 - 20455378	-98240	upstream		BnaA05g23760D	A05	17934925 - 17937608	-101394	upstream	AT3G15720	glycoside hydrolase family 28 protein / polygalacturonase (pectinase) family protein; Pectin lyase-like superfamily protein	0.74	0.75	polygalacturonase activity (carbohydrate metabolic process, cell wall organization); Downregulated by response to cyclopentenone; Pectin lyase-like superfamily protein; FUNCTIONS IN: polygalacturonase activity; INVOLVED IN: response to cyclopentenone, car	-	-	-		https://www.arabidopsis.org/servlets/TairObject?type=locus&name=AT3G15720	http://www.genoscope.cns.fr/brassicanapus/cgi-bin/geneView?src=colza;name=BnaA05g23760D	http://brassicadb.org/brad/searchGene.php?ginput=Bra027211	http://brassicadb.org/brad/proteinseq.php?ginput=Bra027211
				Bra027212	A05	20455781 - 20456891	-96727	upstream							AT3G17620	F-box family protein; F-box and associated interaction domains-containing protein	0.43		Unknown; F-box and associated interaction domains-containing protein; CONTAINS InterPro DOMAIN/s: F-box domain, cyclin-like (InterPro:IPR001810), F-box domain, Skp2-like (InterPro:IPR022364), F-box associated domain, type 1 (InterPro:IPR006527), F-box associated interaction domain (InterPro:IPR017451); BEST Arabidopsis thaliana protein match is: F-box and associated interaction domains-containing…	-	-	-		https://www.arabidopsis.org/servlets/TairObject?type=locus&name=AT3G17620		http://brassicadb.org/brad/searchGene.php?ginput=Bra027212	http://brassicadb.org/brad/proteinseq.php?ginput=Bra027212
				Bra027213	A05	20462860 - 20463428	-90190	upstream		BnaA05g23800D	A05	17955000 - 17957967	-81035	upstream	AT3G17320	F-box family protein; F-BOX OVEREXPRESSED/OPPRESSED ABA SIGNALING 1, FOA1; F-box and associated interaction domains-containing protein	0.54	0.61	ubiquitin-protein transferase activity ( SCF-dependent proteasomal ubiquitin-dependent protein catabolic process); F-box and associated interaction domains-containing protein; CONTAINS InterPro DOMAIN/s: F-box domain, cyclin-like (InterPro:IPR001810), F-box domain, Skp2-like (InterPro:IPR022364), F-box associated domain, type 1 (InterPro:IPR006527), F-box associated interaction domain (InterPro:I…	-	-	-		https://www.arabidopsis.org/servlets/TairObject?type=locus&name=AT3G17320	http://www.genoscope.cns.fr/brassicanapus/cgi-bin/geneView?src=colza;name=BnaA05g23800D	http://brassicadb.org/brad/searchGene.php?ginput=Bra027213	http://brassicadb.org/brad/proteinseq.php?ginput=Bra027213
				Bra027214	A05	20464888 - 20466082	-87536	upstream		BnaA05g23810D	A05	17965437 - 17966885	-72117	upstream	AT1G52600	signal peptidase, putative; Peptidase S24/S26A/S26B/S26C family protein	0.86	0.86	peptidase activity (proteolysis); Peptidase S24/S26A/S26B/S26C family protein; FUNCTIONS IN: peptidase activity; INVOLVED IN: proteolysis, signal peptide processing; LOCATED IN: endoplasmic reticulum, plasma membrane, membrane; EXPRESSED IN: 26 plant structures; EXPRESSED DURING: 14 growth stages; CONTAINS InterPro DOMAIN/s: Peptidase S24/S26A/S26B, conserved region (InterPro:IPR019759), Peptidas…	-	-	-		https://www.arabidopsis.org/servlets/TairObject?type=locus&name=AT1G52600	http://www.genoscope.cns.fr/brassicanapus/cgi-bin/geneView?src=colza;name=BnaA05g23810D	http://brassicadb.org/brad/searchGene.php?ginput=Bra027214	http://brassicadb.org/brad/proteinseq.php?ginput=Bra027214
				Bra027215	A05	20466332 - 20467612	-86006	upstream		BnaA05g23820D	A05	17966952 - 17969023	-69979	upstream	AT1G52630	unknown protein; O-fucosyltransferase family protein	0.84	0.79	transferase activity, transferring glycosyl groups; O-fucosyltransferase family protein; FUNCTIONS IN: molecular_function unknown; INVOLVED IN: biological_process unknown; LOCATED IN: endomembrane system; EXPRESSED IN: 7 plant structures; EXPRESSED DURING: petal differentiation and expansion stage, E expanded cotyledon stage; CONTAINS InterPro DOMAIN/s: GDP-fucose protein O-fucosyltransferase (In…	-	-	-		https://www.arabidopsis.org/servlets/TairObject?type=locus&name=AT1G52630	http://www.genoscope.cns.fr/brassicanapus/cgi-bin/geneView?src=colza;name=BnaA05g23820D	http://brassicadb.org/brad/searchGene.php?ginput=Bra027215	http://brassicadb.org/brad/proteinseq.php?ginput=Bra027215
				Bra027216	A05	20476066 - 20477062	-76556	upstream							AT3G22345	unknown protein	0.32		Unknown; unknown protein; FUNCTIONS IN: molecular_function unknown; INVOLVED IN: biological_process unknown; LOCATED IN: cellular_component unknown; BEST Arabidopsis thaliana protein match is: F-box family protein with a domain of unknown function (DUF295) (TAIR:AT3G03730.1)	-	-	-		https://www.arabidopsis.org/servlets/TairObject?type=locus&name=AT3G22345		http://brassicadb.org/brad/searchGene.php?ginput=Bra027216	http://brassicadb.org/brad/proteinseq.php?ginput=Bra027216
				Bra027217	A05	20479169 - 20481091	-72527	upstream		BnaA05g23850D	A05	17974801 - 17977055	-61947	upstream	AT3G15690	Single hybrid motif superfamily protein; BCCP-LIKE PROTEIN 2, BLP2; biotin carboxyl carrier protein of acetyl-CoA carboxylase-related;	0.71	0.68	Unknown; Single hybrid motif superfamily protein; LOCATED IN: chloroplast; EXPRESSED IN: 22 plant structures; EXPRESSED DURING: 13 growth stages; CONTAINS InterPro DOMAIN/s: Single hybrid motif (InterPro:IPR011053), Biotin/lipoyl attachment (InterPro:IPR000089); BEST Arabidopsis thaliana protein match is: Single hybrid motif superfamily protein (TAIR:AT1G52670.1)	-	-	-		https://www.arabidopsis.org/servlets/TairObject?type=locus&name=AT3G15690	http://www.genoscope.cns.fr/brassicanapus/cgi-bin/geneView?src=colza;name=BnaA05g23850D	http://brassicadb.org/brad/searchGene.php?ginput=Bra027217	http://brassicadb.org/brad/proteinseq.php?ginput=Bra027217
				Bra027218	A05	20487882 - 20489485	-64133	upstream							AT5G15700	DNA-directed RNA polymerase (RPOT2)	0.66		DNA binding; DNA binding, DNA-directed RNA polymerase activity, RNA polymerase activity (transcription, DNA-templated); Nucleus encoded plastid RNA polymerase. Localized in mitochondria and chloroplast.	-	-	-		https://www.arabidopsis.org/servlets/TairObject?type=locus&name=AT5G15700		http://brassicadb.org/brad/searchGene.php?ginput=Bra027218	http://brassicadb.org/brad/proteinseq.php?ginput=Bra027218
				Bra027219	A05	20495510 - 20496286	-57332	upstream		BnaA05g23860D	A05	17980893 - 17981752	-57250	upstream	AT3G15670	Late embryogenesis abundant protein (LEA) family protein; late embryogenesis abundant protein, putative / LEA protein, putative; LATE EMBRYOGENESIS ACCUMULATING 76, LEA76	0.57	0.56	Unknown (embryo development ending in seed dormancy); Late embryogenesis abundant protein (LEA) family protein; FUNCTIONS IN: molecular_function unknown; INVOLVED IN: embryo development ending in seed dormancy; LOCATED IN: nucleus; EXPRESSED DURING: dry seed stage; BEST Arabidopsis thaliana protein match is: Late embryogenesis abundant protein (LEA) family protein (TAIR:AT1G52690.2)	-	-	-		https://www.arabidopsis.org/servlets/TairObject?type=locus&name=AT3G15670	http://www.genoscope.cns.fr/brassicanapus/cgi-bin/geneView?src=colza;name=BnaA05g23860D	http://brassicadb.org/brad/searchGene.php?ginput=Bra027219	http://brassicadb.org/brad/proteinseq.php?ginput=Bra027219
				Bra027220	A05	20498763 - 20499852	-53766	upstream		BnaA05g23870D	A05	17985359 - 17986780	-52222	upstream	AT3G15660	ATGRX4, GRX4, glutaredoxin 4; A. THALIANA GLUTAREDOXIN 4, ATGRX4, GLUTAREDOXIN 4, GLUTAREDOXIN S15, GRX4, GRXS15	0.88	0.88	metal ion binding; glutaredoxin 4 (GRX4); FUNCTIONS IN: metal ion binding; INVOLVED IN: cell redox homeostasis; LOCATED IN: mitochondrion; EXPRESSED IN: 23 plant structures; EXPRESSED DURING: 13 growth stages; CONTAINS InterPro DOMAIN/s: Thioredoxin fold (InterPro:IPR012335), Glutaredoxin (InterPro:IPR002109), Glutaredoxin-related protein (InterPro:IPR004480), Thioredoxin-like fold (InterPro:IPR0…	-	-	-		https://www.arabidopsis.org/servlets/TairObject?type=locus&name=AT3G15660	http://www.genoscope.cns.fr/brassicanapus/cgi-bin/geneView?src=colza;name=BnaA05g23870D	http://brassicadb.org/brad/searchGene.php?ginput=Bra027220	http://brassicadb.org/brad/proteinseq.php?ginput=Bra027220
				Bra027221	A05	20500131 - 20501659	-51959	upstream		BnaA05g23880D	A05	17986830 - 17988512	-50490	upstream	AT3G15650	alpha/beta-Hydrolases superfamily protein; phospholipase/carboxylesterase family protein	0.87	0.86	hydrolase activity; alpha/beta-Hydrolases superfamily protein; FUNCTIONS IN: hydrolase activity, carboxylesterase activity; EXPRESSED IN: 16 plant structures; EXPRESSED DURING: 11 growth stages; CONTAINS InterPro DOMAIN/s: Phospholipase/carboxylesterase (InterPro:IPR003140); BEST Arabidopsis thaliana protein match is: alpha/beta-Hydrolases superfamily protein (TAIR:AT1G52700.1).	-	-	-		https://www.arabidopsis.org/servlets/TairObject?type=locus&name=AT3G15650	http://www.genoscope.cns.fr/brassicanapus/cgi-bin/geneView?src=colza;name=BnaA05g23880D	http://brassicadb.org/brad/searchGene.php?ginput=Bra027221	http://brassicadb.org/brad/proteinseq.php?ginput=Bra027221
				Bra027222	A05	20506568 - 20509089	-44529	upstream		BnaA05g23890D	A05	17998667 - 18001730	-37272	upstream	AT3G15640	Rubredoxin-like superfamily protein; cytochrome c oxidase family protein	0.64	0.65	cytochrome-c oxidase activity; cobalt ion binding, metal ion binding, zinc ion binding; Rubredoxin-like superfamily protein; FUNCTIONS IN: cytochrome-c oxidase activity, cobalt ion binding, zinc ion binding, metal ion binding; LOCATED IN: mitochondrial envelope, mitochondrion, chloroplast thylakoid membrane; EXPRESSED IN: 22 plant structures; EXPRESSED DURING: 13 growth stages; CONTAINS InterPro …	-	-	-		https://www.arabidopsis.org/servlets/TairObject?type=locus&name=AT3G15640	http://www.genoscope.cns.fr/brassicanapus/cgi-bin/geneView?src=colza;name=BnaA05g23890D	http://brassicadb.org/brad/searchGene.php?ginput=Bra027222	http://brassicadb.org/brad/proteinseq.php?ginput=Bra027222
				Bra027223	A05	20510475 - 20511803	-41815	upstream		BnaA05g23900D	A05	18002189 - 18003944	-35058	upstream	AT3G15640	Rubredoxin-like superfamily protein; cytochrome c oxidase family protein	0.8	0.87	cytochrome-c oxidase activity; cobalt ion binding, metal ion binding, zinc ion binding; Rubredoxin-like superfamily protein; FUNCTIONS IN: cytochrome-c oxidase activity, cobalt ion binding, zinc ion binding, metal ion binding; LOCATED IN: mitochondrial envelope, mitochondrion, chloroplast thylakoid membrane; EXPRESSED IN: 22 plant structures; EXPRESSED DURING: 13 growth stages; CONTAINS InterPro …	-	-	-		https://www.arabidopsis.org/servlets/TairObject?type=locus&name=AT3G15640	http://www.genoscope.cns.fr/brassicanapus/cgi-bin/geneView?src=colza;name=BnaA05g23900D	http://brassicadb.org/brad/searchGene.php?ginput=Bra027223	http://brassicadb.org/brad/proteinseq.php?ginput=Bra027223
				Bra027224	A05	20514465 - 20515666	-37952	upstream		BnaA05g23910D	A05	18004479 - 18006736	-32266	upstream	AT3G15640	Rubredoxin-like superfamily protein; cytochrome c oxidase family protein	0.86	0.72	cytochrome-c oxidase activity; cobalt ion binding, metal ion binding, zinc ion binding; Rubredoxin-like superfamily protein; FUNCTIONS IN: cytochrome-c oxidase activity, cobalt ion binding, zinc ion binding, metal ion binding; LOCATED IN: mitochondrial envelope, mitochondrion, chloroplast thylakoid membrane; EXPRESSED IN: 22 plant structures; EXPRESSED DURING: 13 growth stages; CONTAINS InterPro …	-	-	-		https://www.arabidopsis.org/servlets/TairObject?type=locus&name=AT3G15640	http://www.genoscope.cns.fr/brassicanapus/cgi-bin/geneView?src=colza;name=BnaA05g23910D	http://brassicadb.org/brad/searchGene.php?ginput=Bra027224	http://brassicadb.org/brad/proteinseq.php?ginput=Bra027224
				Bra027225	A05	20516568 - 20522340	-31278	upstream		BnaA05g23920D	A05	18006932 - 18016036	-22966	upstream	AT3G15605	unknown protein (nucleic acid binding)	0.47	0.51	nucleic acid binding, nucleotide binding; nucleic acid binding; FUNCTIONS IN: nucleic acid binding; INVOLVED IN: biological_process unknown; LOCATED IN: cellular_component unknown; EXPRESSED IN: 8 plant structures; EXPRESSED DURING: 6 growth stages; CONTAINS InterPro DOMAIN/s: RNA recognition motif, RNP-1 (InterPro:IPR000504); BEST Arabidopsis thaliana protein match is: bromo-adjacent homology (B…	-	-	-		https://www.arabidopsis.org/servlets/TairObject?type=locus&name=AT3G15605	http://www.genoscope.cns.fr/brassicanapus/cgi-bin/geneView?src=colza;name=BnaA05g23920D	http://brassicadb.org/brad/searchGene.php?ginput=Bra027225	http://brassicadb.org/brad/proteinseq.php?ginput=Bra027225
				Bra027226	A05	20523528 - 20525428	-28190	upstream		BnaA05g23930D	A05	18017224 - 18019348	-19654	upstream	AT3G15590	Tetratricopeptide repeat (TPR)-like superfamily protein; DNA-binding protein, putative;	0.76	0.75	DNA binding; Tetratricopeptide repeat (TPR)-like superfamily protein; FUNCTIONS IN: DNA binding; LOCATED IN: mitochondrion; EXPRESSED IN: 24 plant structures; EXPRESSED DURING: 14 growth stages; CONTAINS InterPro DOMAIN/s: Pentatricopeptide repeat (InterPro:IPR002885); BEST Arabidopsis thaliana protein match is: PENTATRICOPEPTIDE REPEAT 596 (TAIR:AT1G80270.3)	-	-	-		https://www.arabidopsis.org/servlets/TairObject?type=locus&name=AT3G15590	http://www.genoscope.cns.fr/brassicanapus/cgi-bin/geneView?src=colza;name=BnaA05g23930D	http://brassicadb.org/brad/searchGene.php?ginput=Bra027226	http://brassicadb.org/brad/proteinseq.php?ginput=Bra027226
				Bra027227	A05	20525965 - 20526696	-26922	upstream		BnaA05g23940D	A05	18019583 - 18020612	-18390	upstream	AT3G15580	ATG8I, APG8H, Ubiquitin-like superfamily protein; ATG8I, APG8H; APG8H (AUTOPHAGY 8H); APG8 activating enzyme/ APG8-specific protease/ Atg8 ligase/ microtubule binding; AUTOPHAGY 8H, AUTOPHAGY 8I	0.94	0.94	microtubule binding (autophagy, cellular response to nitrogen starvation, proteolysis); Encodes APG8, a component of autophagy conjugation pathway. Delivered to the lumens of vacuole under nitrogen-starvation condition.	-	-	-		https://www.arabidopsis.org/servlets/TairObject?type=locus&name=AT3G15580	http://www.genoscope.cns.fr/brassicanapus/cgi-bin/geneView?src=colza;name=BnaA05g23940D	http://brassicadb.org/brad/searchGene.php?ginput=Bra027227	http://brassicadb.org/brad/proteinseq.php?ginput=Bra027227
				Bra027228	A05	20529042 - 20530619	-22999	upstream							AT3G15570	Phototropic-responsive NPH3 family protein	0.87		signal transducer activity (response to light stimulus); Phototropic-responsive NPH3 family protein; FUNCTIONS IN: signal transducer activity; INVOLVED IN: response to light stimulus; LOCATED IN: cellular_component unknown; EXPRESSED IN: 14 plant structures; EXPRESSED DURING: 9 growth stages; CONTAINS InterPro DOMAIN/s: NPH3 (InterPro:IPR004249); BEST Arabidopsis thaliana protein match is: Photot…	-	-	-		https://www.arabidopsis.org/servlets/TairObject?type=locus&name=AT3G15570		http://brassicadb.org/brad/searchGene.php?ginput=Bra027228	http://brassicadb.org/brad/proteinseq.php?ginput=Bra027228
				Bra027229	A05	20531421 - 20534162	-19456	upstream		BnaA05g23960D	A05	18025981 - 18028924	-10078	upstream	AT3G15550	unknown protein	0.71	0.74	Unknown	XP_009146227, PREDICTED: trichohyalin [Brassica rapa]; XP_006406952, hypothetical protein EUTSA_v10020202mg [Eutrema salsugineum]; XP_006299741, hypothetical protein CARUB_v10015934mg [Capsella rubella]; XP_010503155, PREDICTED: uncharacterized abhydrolase domain-containing protein DDB_G0269086-like [Camelina sativa]; NP_188174, uncharacterized protein [Arabidopsis thaliana]; KFK38901, hypothetic…	Hanada et al. 2011	No connection to abiotic/ heat stress.		https://www.arabidopsis.org/servlets/TairObject?type=locus&name=AT3G15550	http://www.genoscope.cns.fr/brassicanapus/cgi-bin/geneView?src=colza;name=BnaA05g23960D	http://brassicadb.org/brad/searchGene.php?ginput=Bra027229	http://brassicadb.org/brad/proteinseq.php?ginput=Bra027229
				Bra027230	A05	20536548 - 20538348	-15270	upstream		BnaA05g23970D	A05	18031139 - 18031603	-7399	upstream	AT1G28030	2-oxoglutarate (2OG) and Fe(II)-dependent oxygenase superfamily protein	0.69	0.67	oxidoreductase activity, acting on paired donors, with incorporation or reduction of molecular oxygen, 2-oxoglutarate as one donor, and incorporation of one atom each of oxygen into both donors	XP_009146228, PREDICTED: probable 2-oxoglutarate-dependent dioxygenase AOP1 isoform X1 [Brassica rapa]; XP_013584295, PREDICTED: probable 2-oxoglutarate-dependent dioxygenase AOP1 [Brassica oleracea var. oleracea]; XP_006406953, hypothetical protein EUTSA_v10021144mg [Eutrema salsugineum]; KFK38898, hypothetical protein AALP_AA3G175300 [Arabis alpina]; NP_174124, 2-oxoglutarate (2OG) and Fe(II)-d…	Yu et al. 2005; Hanada et al. 2011; Wuest et al. 2010	No connection to abiotic/ heat stress.		https://www.arabidopsis.org/servlets/TairObject?type=locus&name=AT1G28030	http://www.genoscope.cns.fr/brassicanapus/cgi-bin/geneView?src=colza;name=BnaA05g23970D	http://brassicadb.org/brad/searchGene.php?ginput=Bra027230	http://brassicadb.org/brad/proteinseq.php?ginput=Bra027230
				Bra027231	A05	20543609 - 20553762	Gene	Gene		BnaA05g23980D	A05	18038589 - 18039323	Gene	Gene	AT1G28030	2-oxoglutarate (2OG) and Fe(II)-dependent oxygenase superfamily protein	0.63	0.69	oxidoreductase activity, acting on paired donors, with incorporation or reduction of molecular oxygen, 2-oxoglutarate as one donor, and incorporation of one atom each of oxygen into both donors	XP_009146228, PREDICTED: probable 2-oxoglutarate-dependent dioxygenase AOP1 isoform X1 [Brassica rapa]; XP_013584295, PREDICTED: probable 2-oxoglutarate-dependent dioxygenase AOP1 [Brassica oleracea var. oleracea]; XP_006406953, hypothetical protein EUTSA_v10021144mg [Eutrema salsugineum]; XP_006406954, hypothetical protein EUTSA_v10021145mg [Eutrema salsugineum]; KFK38898, hypothetical protein A…	Yu et al. 2005; Hanada et al. 2011; Wuest et al. 2010	No connection to abiotic/ heat stress.		https://www.arabidopsis.org/servlets/TairObject?type=locus&name=AT1G28030	http://www.genoscope.cns.fr/brassicanapus/cgi-bin/geneView?src=colza;name=BnaA05g23980D	http://brassicadb.org/brad/searchGene.php?ginput=Bra027231	http://brassicadb.org/brad/proteinseq.php?ginput=Bra027231
				Bra027232	A05	20555342 - 20556584	1773	downstream							AT3G15540	INDOLE-3-ACETIC ACID INDUCIBLE 19 (IAA19)/ MASSUGU 2 (MSG20)	0.89		transcription factor activity, sequence-specific DNA binding (gravitropism, phototropism, response to auxin, stamen filament development)	-	-	-		https://www.arabidopsis.org/servlets/TairObject?type=locus&name=AT3G15540		http://brassicadb.org/brad/searchGene.php?ginput=Bra027232	http://brassicadb.org/brad/proteinseq.php?ginput=Bra027232
				Bra027233	A05	20569576 - 20569782	16007	downstream		BnaA05g24000D	A05	18061976 - 18062553	22925	downstream	AT3G15534	unknown protein	0.94	0.94	Unknown	-	-	-		https://www.arabidopsis.org/servlets/TairObject?type=locus&name=AT3G15534	http://www.genoscope.cns.fr/brassicanapus/cgi-bin/geneView?src=colza;name=BnaA05g24000D	http://brassicadb.org/brad/searchGene.php?ginput=Bra027233	http://brassicadb.org/brad/proteinseq.php?ginput=Bra027233
				Bra027234	A05	20576794 - 20577746	23225	downstream		BnaA05g24010D	A05	18072532 - 18073848	33481	downstream	AT3G15530	S-adenosyl-L-methionine-dependent methyltransferases superfamily protein; methyltransferase;	0.81	0.81	Unknown; S-adenosyl-L-methionine-dependent methyltransferases superfamily protein; FUNCTIONS IN: methyltransferase activity; INVOLVED IN: metabolic process; LOCATED IN: cellular_component unknown; EXPRESSED IN: 22 plant structures; EXPRESSED DURING: 14 growth stages; CONTAINS InterPro DOMAIN/s: Methyltransferase type 11 (InterPro:IPR013216); BEST Arabidopsis thaliana protein match is: S-adenosyl-…	-	-	-		https://www.arabidopsis.org/servlets/TairObject?type=locus&name=AT3G15530	http://www.genoscope.cns.fr/brassicanapus/cgi-bin/geneView?src=colza;name=BnaA05g24010D	http://brassicadb.org/brad/searchGene.php?ginput=Bra027234	http://brassicadb.org/brad/proteinseq.php?ginput=Bra027234
				Bra027235	A05	20578567 - 20581505	24998	downstream		BnaA05g24020D	A05	18074217 - 18077233	35166	downstream	AT3G15520	Cyclophilin-like peptidyl-prolyl cis-trans isomerase family protein; peptidyl-prolyl cis-trans isomerase TLP38, chloroplast / thylakoid lumen PPIase of 38 kDa / cyclophilin / rotamase;	0.85	0.87	peptidyl-prolyl cis-trans isomerase activity (protein folding); Cyclophilin-like peptidyl-prolyl cis-trans isomerase family protein; FUNCTIONS IN: peptidyl-prolyl cis-trans isomerase activity; INVOLVED IN: protein folding; LOCATED IN: thylakoid, thylakoid lumen, chloroplast thylakoid membrane, chloroplast thylakoid lumen, chloroplast; EXPRESSED IN: 22 plant structures; EXPRESSED DURING: 14 growth…	-	-	-		https://www.arabidopsis.org/servlets/TairObject?type=locus&name=AT3G15520	http://www.genoscope.cns.fr/brassicanapus/cgi-bin/geneView?src=colza;name=BnaA05g24020D	http://brassicadb.org/brad/searchGene.php?ginput=Bra027235	http://brassicadb.org/brad/proteinseq.php?ginput=Bra027235
				Bra027236	A05	20581681 - 20582001	28112	downstream		BnaA05g24030D	A05	18077409 - 18077729	38358	downstream	AT3G15518	unknown protein	0.87	0.87	unknown; unknown protein; FUNCTIONS IN: molecular_function unknown; INVOLVED IN: biological_process unknown; LOCATED IN: cellular_component unknown	-	-	-		https://www.arabidopsis.org/servlets/TairObject?type=locus&name=AT3G15518	http://www.genoscope.cns.fr/brassicanapus/cgi-bin/geneView?src=colza;name=BnaA05g24030D	http://brassicadb.org/brad/searchGene.php?ginput=Bra027236	http://brassicadb.org/brad/proteinseq.php?ginput=Bra027236
				Bra027237	A05	20590430 - 20591850	36861	downstream		BnaA05g24040D	A05	18085825 - 18087733	46774	downstream	AT3G15510	ATNAC2, ANAC056, NARS1, NAC2 | NAC domain containing protein 2; ATNAC2, ANAC056, NARS1; ATNAC2 (ARABIDOPSIS NAC DOMAIN CONTAINING PROTEIN 2); transcription factor; ANAC056, ARABIDOPSIS NAC DOMAIN CONTAINING PROTEIN 56, ATNAC2, NAC DOMAIN CONTAINING PROTEIN 2, NAC-REGULATED SEED MORPHOLOGY 1, NAC2, NARS1	0.83	0.82	transcription regulatory region DNA binding; transcription factor activity, sequence-specific DNA binding 9multicellular organism development); Note of caution: not to be confused with another protein (AtNAC6 locus AT5G39610) which on occasion has also been referred to as AtNAC2.	-	-	-		https://www.arabidopsis.org/servlets/TairObject?type=locus&name=AT3G15510	http://www.genoscope.cns.fr/brassicanapus/cgi-bin/geneView?src=colza;name=BnaA05g24040D	http://brassicadb.org/brad/searchGene.php?ginput=Bra027237	http://brassicadb.org/brad/proteinseq.php?ginput=Bra027237
										BnaA05g23990D	A05	18045287 - 18045517	6236	downstream	AT5G18880	RNA-directed DNA polymerase (reverse transcriptase)-related family protein		0.46	Unknown	XP_009139674, PREDICTED: putative ribonuclease H protein At1g65750 [Brassica rapa]; XP_013617557, PREDICTED: uncharacterized protein LOC106324083 [Brassica oleracea var. oleracea]; XP_013673402, PREDICTED: uncharacterized protein LOC106377691 [Brassica napus]; ABE65413 , hypothetical protein At1g62890 [Arabidopsis thaliana]; XP_002877500, predicted protein [Arabidopsis lyrata subsp. lyrata]; XP_0…	-	-		https://www.arabidopsis.org/servlets/TairObject?type=locus&name=AT5G18880	http://www.genoscope.cns.fr/brassicanapus/cgi-bin/geneView?src=colza;name=BnaA05g23990D
										BnaA05g23950D	A05	18022307 - 18025355	-13647	upstream	AT3G15570	Phototropic-responsive NPH3 family protein		0.83	signal transducer activity (response to light stimulus)	XP_009146226, PREDICTED: coleoptile phototropism protein 1 [Brassica rapa]; XP_013587581, PREDICTED: root phototropism protein 3 [Brassica oleracea var. oleracea]; XP_006406951, hypothetical protein EUTSA_v10022354mg [Eutrema salsugineum]; KFK38904, hypothetical protein AALP_AA3G175900 [Arabis alpina]; XP_006297661, hypothetical protein CARUB_v10013684mg [Capsella rubella]; XP_002885094, phototro…	Hanada et al. 2011; Ascencio-Ibanez et al. 2008; Zheng et al. 2006; Kiba et al. 2005; Hass et al. 2004	No connection to abiotic/ heat stress.		https://www.arabidopsis.org/servlets/TairObject?type=locus&name=AT3G15570	http://www.genoscope.cns.fr/brassicanapus/cgi-bin/geneView?src=colza;name=BnaA05g23950D
										BnaA05g23680D	A05	17891680 - 17895972	-143030	upstream	AT3G15870	Fatty acid desaturase family protein		0.61	oxidoreductase activity; Fatty acid desaturase family protein; FUNCTIONS IN: oxidoreductase activity, oxidoreductase activity, acting on paired donors, with oxidation of a pair of donors resulting in the reduction of molecular oxygen to two molecules of water; INVOLVED IN: oxidation reduction, lipid metabolic process; EXPRESSED IN: sepal; EXPRESSED DURING: petal differentiation and expansion stag…	-	-	-		https://www.arabidopsis.org/servlets/TairObject?type=locus&name=AT3G15870	http://www.genoscope.cns.fr/brassicanapus/cgi-bin/geneView?src=colza;name=BnaA05g23680D
										BnaA05g23770D	A05	17938011 - 17939129	-99873	upstream	AT2G17830	F-box and associated interaction domains-containing protein		0.42	Unknown; F-box and associated interaction domains-containing protein; CONTAINS InterPro DOMAIN/s: F-box domain, cyclin-like (InterPro:IPR001810), F-box domain, Skp2-like (InterPro:IPR022364), F-box associated domain, type 1 (InterPro:IPR006527), F-box associated interaction domain (InterPro:IPR017451); BEST Arabidopsis thaliana protein match is: F-box and associated interaction domains-containing…	-	-	-		https://www.arabidopsis.org/servlets/TairObject?type=locus&name=AT2G17830	http://www.genoscope.cns.fr/brassicanapus/cgi-bin/geneView?src=colza;name=BnaA05g23770D
										BnaA05g23780D	A05	17949362 - 17950678	-88324	upstream	AT4G01925	Cysteine/Histidine-rich C1 domain family protein		0.72	Unknown; Cysteine/Histidine-rich C1 domain family protein; CONTAINS InterPro DOMAIN/s: DC1 (InterPro:IPR004146), C1-like (InterPro:IPR011424); BEST Arabidopsis thaliana protein match is: Cysteine/Histidine-rich C1 domain family protein (TAIR:AT4G01910.1)	-	-	-		https://www.arabidopsis.org/servlets/TairObject?type=locus&name=AT4G01925	http://www.genoscope.cns.fr/brassicanapus/cgi-bin/geneView?src=colza;name=BnaA05g23780D
										BnaA05g23790D	A05	17952416 - 17953997	-85005	upstream	AT3G25110	AtFaTA, FaTA | fatA acyl-ACP thioesterase;		0.63	ACP phosphopantetheine attachment site binding involved in fatty acid biosynthetic process, acyl-[acyl-carrier-protein] hydrolase activity (fatty acid biosynthetic process); Encodes a FatA acyl-ACP thioesterase;	-	-	-		https://www.arabidopsis.org/servlets/TairObject?type=locus&name=AT3G25110	http://www.genoscope.cns.fr/brassicanapus/cgi-bin/geneView?src=colza;name=BnaA05g23790D
										BnaA05g23830D	A05	17969271 - 17971520	-67482	upstream	AT4G26310	elongation factor P (EF-P) family protein		0.89	translation elongation factor activity (translation elongation); elongation factor P (EF-P) family protein; FUNCTIONS IN: translation elongation factor activity; INVOLVED IN: translational elongation; EXPRESSED IN: 22 plant structures; EXPRESSED DURING: 13 growth stages; CONTAINS InterPro DOMAIN/s: Translation protein SH3-like (InterPro:IPR008991), Nucleic acid-binding, OB-fold (InterPro:IPR01234…	-	-	-		https://www.arabidopsis.org/servlets/TairObject?type=locus&name=AT4G26310	http://www.genoscope.cns.fr/brassicanapus/cgi-bin/geneView?src=colza;name=BnaA05g23830D
										BnaA05g23840D	A05	17974511 - 17974711	-64291	upstream	AT1G15385	unknown protein		0.75	unknown; unknown protein; CONTAINS InterPro DOMAIN/s: Protein of unknown function DUF761, plant (InterPro:IPR008480)	-	-	-		https://www.arabidopsis.org/servlets/TairObject?type=locus&name=AT1G15385	http://www.genoscope.cns.fr/brassicanapus/cgi-bin/geneView?src=colza;name=BnaA05g23840D
UQnapus5640	A05	21539755	A05; 2402131 - 2402180	Bra004894	A05	2347927 - 2349138	-54204	upstream	A05; 2523586 - 2523635	BnaA05g04640D	A05	2467482 - 2470598	-56104	upstream	AT2G45240.1	-	0.81	0.93	Encodes a cytoplasmic MAP1 like methionine aminopeptidase which is involved in removing the N-terminal methionine from proteins. Induced mutants using RNAi technology which knocks out both MAP1 and MAP2 like genes show abnormal development.	-	-	-
				Bra004895	A05	2349797 - 2352347	-52334	upstream		BnaA05g04650D	A05	2471130 - 2472416	-52456	upstream	AT2G45260.1	-	0.83	0.78	Plant protein of unknown function (DUF641); FUNCTIONS IN: molecular_function unknown; INVOLVED IN: biological_process unknown; LOCATED IN: plasma membrane; EXPRESSED IN: cultured cell; CONTAINS InterPro DOMAIN/s: Protein of unknown function DUF641, plant (InterPro:IPR006943); BEST Arabidopsis thaliana protein match is: Plant protein of unknown function (DUF641) (TAIR:AT4G34080.1)	-	-	-
				Bra004896	A05	2353963 - 2355351	-48168	upstream		BnaA05g04660D	A05	2473033 - 2475644	-50553	upstream	AT2G45270.1	-	0.93	0.85	Mitochondrial protein essential for embryo development.	-	-	-
				Bra004897	A05	2364883 - 2367127	-37248	upstream		BnaA05g04670D	A05	2476363 - 2477889	-47223	upstream	AT2G45330.1	-	0.82	0.93	embryo defective 1067 (emb1067); FUNCTIONS IN: tRNA 2'-phosphotransferase activity, transferase activity, transferring phosphorus-containing groups; INVOLVED IN: tRNA splicing, via endonucleolytic cleavage and ligation, embryo development ending in seed dormancy; EXPRESSED IN: male gametophyte, pollen tube; EXPRESSED DURING: L mature pollen stage, M germinated pollen stage; CONTAINS InterPro DOMA…	-	-	-
				Bra004898	A05	2367652 - 2370453	-34479	upstream		BnaA05g04680D	A05	2479100 - 2479885	-44486	upstream	AT2G26020.1	-	0.84	0.36	Predicted to encode a PR (pathogenesis-related) protein. Belongs to the plant defensin (PDF) family with the following members: At1g75830/PDF1.1, At5g44420/PDF1.2a, At2g26020/PDF1.2b, At5g44430/PDF1.2c, At2g26010/PDF1.3, At1g19610/PDF1.4, At1g55010/PDF1.5, At2g02120/PDF2.1, At2g02100/PDF2.2, At2g02130/PDF2.3, At1g61070/PDF2.4, At5g63660/PDF2.5, At2g02140/PDF2.6, At5g38330/PDF3.1 and At4g30070/PDF…	-	-	-
				Bra004899	A05	2371226 - 2378801	-30905	upstream		BnaA05g04690D	A05	2481142 - 2481813	-42444	upstream	AT2G26020.1	-	0.81	0.36	Predicted to encode a PR (pathogenesis-related) protein. Belongs to the plant defensin (PDF) family with the following members: At1g75830/PDF1.1, At5g44420/PDF1.2a, At2g26020/PDF1.2b, At5g44430/PDF1.2c, At2g26010/PDF1.3, At1g19610/PDF1.4, At1g55010/PDF1.5, At2g02120/PDF2.1, At2g02100/PDF2.2, At2g02130/PDF2.3, At1g61070/PDF2.4, At5g63660/PDF2.5, At2g02140/PDF2.6, At5g38330/PDF3.1 and At4g30070/PDF…	-	-	-
				Bra004900	A05	2390548 - 2390899	-11583	upstream		BnaA05g04700D	A05	2485422 - 2486288	-38164	upstream	AT2G45330.1	-	0.38	0.88	embryo defective 1067 (emb1067); FUNCTIONS IN: tRNA 2'-phosphotransferase activity, transferase activity, transferring phosphorus-containing groups; INVOLVED IN: tRNA splicing, via endonucleolytic cleavage and ligation, embryo development ending in seed dormancy; EXPRESSED IN: male gametophyte, pollen tube; EXPRESSED DURING: L mature pollen stage, M germinated pollen stage; CONTAINS InterPro DOMA…	-	-	-
				Bra004901	A05	2393606 - 2394782	-8525	upstream		BnaA05g04710D	A05	2487468 - 2489835	-36118	upstream	AT2G45280.2	-	0.96	0.85	Encodes a protein similar to RAD51C involved in double stranded break repair via homologous recombination. Sensitive to DSB induced by Mitomycin C and gamma irradiation, interacts with Atxrcc3 in yeast two-hybrid assay. Required for female meiosis but not critical for mitosis under normal conditions.	-	-	-
				Bra004902	A05	2400553 - 2403184	-1578	Gene		BnaA05g04720D	A05	2490235 - 2493240	-33351	upstream	AT2G45290.1	-	0.89	0.85	Transketolase; FUNCTIONS IN: catalytic activity, transketolase activity; INVOLVED IN: response to cadmium ion; LOCATED IN: chloroplast stroma, chloroplast; EXPRESSED IN: 25 plant structures; EXPRESSED DURING: 16 growth stages; CONTAINS InterPro DOMAIN/s: Transketolase, bacterial-like (InterPro:IPR005478), Transketolase, N-terminal (InterPro:IPR005474), Transketolase, C-terminal (InterPro:IPR00547…	-	-	-
				Bra004903	A05	2403356 - 2405194	1225	downstream		BnaA05g04730D	A05	2493762 - 2495845	-29824	upstream	AT2G45330.1	-	0.83	0.94	embryo defective 1067 (emb1067); FUNCTIONS IN: tRNA 2'-phosphotransferase activity, transferase activity, transferring phosphorus-containing groups; INVOLVED IN: tRNA splicing, via endonucleolytic cleavage and ligation, embryo development ending in seed dormancy; EXPRESSED IN: male gametophyte, pollen tube; EXPRESSED DURING: L mature pollen stage, M germinated pollen stage; CONTAINS InterPro DOMA…	-	-	-
				Bra004904	A05	2408462 - 2409246	6331	downstream		BnaA05g04740D	A05	2495965 - 2498743	-27621	upstream	AT4G00100.1	-	0.78	0.97	Encodes a cytoplasmic ribosomal protein S13 homologue involved in early leaf development The mRNA is cell-to-cell mobile.	-	-	-
										BnaA05g04750D	A05	2498852 - 2503863	-24734	upstream	AT1G48860.1	-		0.81	RNA 3'-terminal phosphate cyclase/enolpyruvate transferase, alpha/beta; FUNCTIONS IN: 3-phosphoshikimate 1-carboxyvinyltransferase activity, catalytic activity, transferase activity, transferring alkyl or aryl (other than methyl) groups; INVOLVED IN: glyphosate metabolic process, aromatic amino acid family biosynthetic process; LOCATED IN: chloroplast; CONTAINS InterPro DOMAIN/s: 3-phosphoshikima…	-	-	-
										BnaA05g04760D	A05	2513096 - 2513763	-10490	upstream	AT2G26020.1	-		0.38	Predicted to encode a PR (pathogenesis-related) protein. Belongs to the plant defensin (PDF) family with the following members: At1g75830/PDF1.1, At5g44420/PDF1.2a, At2g26020/PDF1.2b, At5g44430/PDF1.2c, At2g26010/PDF1.3, At1g19610/PDF1.4, At1g55010/PDF1.5, At2g02120/PDF2.1, At2g02100/PDF2.2, At2g02130/PDF2.3, At1g61070/PDF2.4, At5g63660/PDF2.5, At2g02140/PDF2.6, At5g38330/PDF3.1 and At4g30070/PDF…	-	-	-
										BnaA05g04770D	A05	2516036 - 2517477	-7550	upstream	AT4G00100.1	-		0.96	Encodes a cytoplasmic ribosomal protein S13 homologue involved in early leaf development The mRNA is cell-to-cell mobile.	-	-	-
										BnaA05g04780D	A05	2522118 - 2524736	-1468	Gene	AT2G45340.1	-		0.87	Leucine-rich repeat protein kinase family protein; FUNCTIONS IN: protein serine/threonine kinase activity, protein kinase activity, ATP binding; INVOLVED IN: transmembrane receptor protein tyrosine kinase signaling pathway, protein amino acid phosphorylation; LOCATED IN: endomembrane system; EXPRESSED IN: 21 plant structures; EXPRESSED DURING: 13 growth stages; CONTAINS InterPro DOMAIN/s: Protein…	-	-	-
										BnaA05g04790D	A05	2524908 - 2526740	1322	downstream	AT2G45350.1	-		0.79	Encodes a member of a PCMP (plant combinatorial and modular protein) family (PCMP-E subfamily) with 11 pentatricopeptide (PPR) repeats. The protein is involved in RNA editing of the initiation codon of ndhD in the chloroplast.	-	-	-
										BnaA05g04800D	A05	2529455 - 2530243	5869	downstream	AT2G45360.1	-		0.78	Protein of unknown function (DUF1442); CONTAINS InterPro DOMAIN/s: Protein of unknown function DUF1442 (InterPro:IPR009902); BEST Arabidopsis thaliana protein match is: Protein of unknown function (DUF1442) (TAIR:AT3G60780.1)	-	-	-
UQnapus2055	A05	7032029	A05; 17621563 - 17621612	Bra035738	A05	17534360 - 17537832	-87203	upstream	A03; 15586121 - 15586170	BnaA05g20060D	A05	15512440 - 15515912	-73681	upstream	AT2G07240.1	-	0.29	0.29	cysteine-type peptidases;cysteine-type peptidases; FUNCTIONS IN: cysteine-type peptidase activity; INVOLVED IN: proteolysis; LOCATED IN: cellular_component unknown; CONTAINS InterPro DOMAIN/s: Domain of unknown function DUF1985 (InterPro:IPR015410), Peptidase C48, SUMO/Sentrin/Ubl1 (InterPro:IPR003653)	-	-	-		https://www.arabidopsis.org/servlets/TairObject?type=locus&name=AT2G07240	http://www.genoscope.cns.fr/brassicanapus/cgi-bin/geneView?src=colza;name=BnaA05g20060D
				Bra035739	A05	17541355 - 17543061	-80208	upstream		BnaA05g20070D	A05	15519684 - 15521390	-66437	upstream	AT5G03910.1	-	0.21	0.25	member of ATH subfamily	-	-	-		https://www.arabidopsis.org/servlets/TairObject?type=locus&name=AT5G03910	http://www.genoscope.cns.fr/brassicanapus/cgi-bin/geneView?src=colza;name=BnaA05g20070D
				Bra035740	A05	17566242 - 17567453	-55321	upstream		BnaA05g20080D	A05	15549000 - 15550346	-37121	upstream	AT3G20830.1	-	0.81	0.81	AGC (cAMP-dependent, cGMP-dependent and protein kinase C) kinase family protein; FUNCTIONS IN: kinase activity; INVOLVED IN: protein amino acid phosphorylation; LOCATED IN: chloroplast; EXPRESSED IN: hypocotyl, male gametophyte, root, pedicel, carpel; EXPRESSED DURING: 4 anthesis; CONTAINS InterPro DOMAIN/s: Protein kinase, ATP binding site (InterPro:IPR017441), Protein kinase, catalytic domain (…	-	-	-		https://www.arabidopsis.org/servlets/TairObject?type=locus&name=AT3G20830	http://www.genoscope.cns.fr/brassicanapus/cgi-bin/geneView?src=colza;name=BnaA05g20080D
				Bra035741	A05	17572350 - 17573447	-49213	upstream		BnaA05g20090D	A05	15556525 - 15557812	-29596	upstream	AT3G20820.1	-	0.91	0.91	Leucine-rich repeat (LRR) family protein; INVOLVED IN: signal transduction, defense response; LOCATED IN: apoplast, cell wall, chloroplast, membrane; EXPRESSED IN: 23 plant structures; EXPRESSED DURING: 13 growth stages; CONTAINS InterPro DOMAIN/s: Leucine-rich repeat-containing N-terminal domain, type 2 (InterPro:IPR013210), Leucine-rich repeat (InterPro:IPR001611); BEST Arabidopsis thaliana pro…	-	-	-		https://www.arabidopsis.org/servlets/TairObject?type=locus&name=AT3G20820	http://www.genoscope.cns.fr/brassicanapus/cgi-bin/geneView?src=colza;name=BnaA05g20090D
				Bra035742	A05	17575804 - 17577757	-45759	upstream		BnaA05g20100D	A05	15559975 - 15562212	-26146	upstream	AT3G20810.2	-	0.83	0.83	JMJD5 encodes a protein which contains a jumonji-C (jmjC) domain. jmjd5 mutant plants have a short-period circadian phenotype. JMJD5 has histone demethylase activity and interacts with EFM to repress FT.	-	-	-		https://www.arabidopsis.org/servlets/TairObject?type=locus&name=AT3G20810	http://www.genoscope.cns.fr/brassicanapus/cgi-bin/geneView?src=colza;name=BnaA05g20100D
				Bra035743	A05	17603923 - 17605879	-17640	upstream		BnaA05g20110D	A05	15567989 - 15570240	-18132	upstream	AT3G20800.1	-	0.93	0.93	Cell differentiation, Rcd1-like protein; CONTAINS InterPro DOMAIN/s: Cell differentiation, Rcd1-like (InterPro:IPR007216); BEST Arabidopsis thaliana protein match is: Cell differentiation, Rcd1-like protein (TAIR:AT5G12980.1)	-	-	-		https://www.arabidopsis.org/servlets/TairObject?type=locus&name=AT3G20800	http://www.genoscope.cns.fr/brassicanapus/cgi-bin/geneView?src=colza;name=BnaA05g20110D
				Bra035744	A05	17606263 - 17608638	-15300	upstream		BnaA05g20120D	A05	15570305 - 15572991	-15816	upstream	AT3G20790.1	-	0.84	0.85	NAD(P)-binding Rossmann-fold superfamily protein; FUNCTIONS IN: oxidoreductase activity, binding, catalytic activity; INVOLVED IN: oxidation reduction, metabolic process; EXPRESSED IN: 23 plant structures; EXPRESSED DURING: 15 growth stages; CONTAINS InterPro DOMAIN/s: Oxidoreductase, N-terminal (InterPro:IPR000683), Oxidoreductase, C-terminal (InterPro:IPR004104), NAD(P)-binding domain (InterPro…	-	-	-		https://www.arabidopsis.org/servlets/TairObject?type=locus&name=AT3G20790	http://www.genoscope.cns.fr/brassicanapus/cgi-bin/geneView?src=colza;name=BnaA05g20120D
				Bra035745	A05	17608983 - 17613314	-12580	upstream		BnaA05g20130D	A05	15573170 - 15577740	-12951	upstream	AT3G20780.1	-	0.91	0.92	Encodes putative eukaryotic homolog of archaebacterial topoisomerase VI subunit B, TOP6B. Is essential for endoreduplication and is involved in cell expansion and cell proliferation. The hlq (harlequin) dwarf mutant has fewer root hair and leaf trichome. It has abnormal epidermal cell and accumulates callose.	-	-	-		https://www.arabidopsis.org/servlets/TairObject?type=locus&name=AT3G20780	http://www.genoscope.cns.fr/brassicanapus/cgi-bin/geneView?src=colza;name=BnaA05g20130D
				Bra035746	A05	17614716 - 17616557	-6847	upstream		BnaA05g20140D	A05	15578368 - 15581110	-7753	upstream	AT3G20770.1	-	0.72	0.6	Encodes EIN3 (ethylene-insensitive3), a nuclear transcription factor that initiates downstream transcriptional cascades for ethylene responses.	-	-	-		https://www.arabidopsis.org/servlets/TairObject?type=locus&name=AT3G20770	http://www.genoscope.cns.fr/brassicanapus/cgi-bin/geneView?src=colza;name=BnaA05g20140D
				Bra035747	A05	17625585 - 17626132	4022	downstream		BnaA05g20150D	A05	15590152 - 15592687	4031	downstream	AT3G20740.1	-	0.86	0.36	Encodes a protein similar to the transcriptional regular of the animal Polycomb group and is involved in regulation of establishment of anterior-posterior polar axis in the endosperm and repression of flowering during vegetative phase. Mutation leads endosperm to develop in the absence of fertilization and flowers to form in seedlings and non-reproductive organs. Also exhibits maternal effect gam…	-	-	-		https://www.arabidopsis.org/servlets/TairObject?type=locus&name=AT3G20740	http://www.genoscope.cns.fr/brassicanapus/cgi-bin/geneView?src=colza;name=BnaA05g20150D
				Bra035748	A05	17627667 - 17635847	6104	downstream		BnaA05g20160D	A05	15592751 - 15593540	6630	downstream	AT3G20770.1	-	0.8	0.95	Encodes EIN3 (ethylene-insensitive3), a nuclear transcription factor that initiates downstream transcriptional cascades for ethylene responses.	-	-	-		https://www.arabidopsis.org/servlets/TairObject?type=locus&name=AT3G20770	http://www.genoscope.cns.fr/brassicanapus/cgi-bin/geneView?src=colza;name=BnaA05g20160D
				Bra035749	A05	17645718 - 17646812	24155	downstream		BnaA05g20170D	A05	15602340 - 15603435	16219	downstream	AT1G66420.1	-	0.24	0.24	DNA-binding storekeeper protein-related transcriptional regulator; CONTAINS InterPro DOMAIN/s: Protein of unknown function DUF573 (InterPro:IPR007592); BEST Arabidopsis thaliana protein match is: DNA-binding storekeeper protein-related transcriptional regulator (TAIR:AT2G01370.1)	-	-	-		https://www.arabidopsis.org/servlets/TairObject?type=locus&name=AT1G66420	http://www.genoscope.cns.fr/brassicanapus/cgi-bin/geneView?src=colza;name=BnaA05g20170D
				Bra035750	A05	17659999 - 17662363	38436	downstream		BnaA05g20180D	A05	15618460 - 15620822	32339	downstream	AT3G20740.1	-	0.65	0.65	Encodes a protein similar to the transcriptional regular of the animal Polycomb group and is involved in regulation of establishment of anterior-posterior polar axis in the endosperm and repression of flowering during vegetative phase. Mutation leads endosperm to develop in the absence of fertilization and flowers to form in seedlings and non-reproductive organs. Also exhibits maternal effect gam…	-	-	-		https://www.arabidopsis.org/servlets/TairObject?type=locus&name=AT3G20740	http://www.genoscope.cns.fr/brassicanapus/cgi-bin/geneView?src=colza;name=BnaA05g20180D
				Bra035751	A05	17666188 - 17668754	44625	downstream		BnaA05g20190D	A05	15624459 - 15627114	38338	downstream	AT3G20740.1	-	0.81	0.81	Encodes a protein similar to the transcriptional regular of the animal Polycomb group and is involved in regulation of establishment of anterior-posterior polar axis in the endosperm and repression of flowering during vegetative phase. Mutation leads endosperm to develop in the absence of fertilization and flowers to form in seedlings and non-reproductive organs. Also exhibits maternal effect gam…	-	-	-		https://www.arabidopsis.org/servlets/TairObject?type=locus&name=AT3G20740	http://www.genoscope.cns.fr/brassicanapus/cgi-bin/geneView?src=colza;name=BnaA05g20190D
				Bra035752	A05	17669034 - 17671957	47471	downstream		BnaA05g20200D	A05	15627384 - 15630303	41263	downstream	AT3G20730.1	-	0.75	0.74	Tetratricopeptide repeat (TPR)-like superfamily protein; FUNCTIONS IN: binding; INVOLVED IN: biological_process unknown; LOCATED IN: endomembrane system; EXPRESSED IN: 14 plant structures; EXPRESSED DURING: 6 growth stages; CONTAINS InterPro DOMAIN/s: Tetratricopeptide-like helical (InterPro:IPR011990), Pentatricopeptide repeat (InterPro:IPR002885); BEST Arabidopsis thaliana protein match is: Tet…	-	-	-		https://www.arabidopsis.org/servlets/TairObject?type=locus&name=AT3G20730	http://www.genoscope.cns.fr/brassicanapus/cgi-bin/geneView?src=colza;name=BnaA05g20200D
				Bra035753	A05	17678575 - 17685458	57012	downstream		BnaA05g20210D	A05	15634122 - 15635637	48001	downstream	AT4G28550.1	-	0.69	0.65	Ypt/Rab-GAP domain of gyp1p superfamily protein; FUNCTIONS IN: RAB GTPase activator activity; INVOLVED IN: regulation of Rab GTPase activity; LOCATED IN: intracellular; EXPRESSED IN: sperm cell, root, flower; EXPRESSED DURING: 4 anthesis, petal differentiation and expansion stage; CONTAINS InterPro DOMAIN/s: RabGAP/TBC (InterPro:IPR000195); BEST Arabidopsis thaliana protein match is: Ypt/Rab-GAP …	-	-	-		https://www.arabidopsis.org/servlets/TairObject?type=locus&name=AT4G28550	http://www.genoscope.cns.fr/brassicanapus/cgi-bin/geneView?src=colza;name=BnaA05g20210D
				Bra035754	A05	17686425 - 17687531	64862	downstream		BnaA05g20220D	A05	15635745 - 15641216	49624	downstream	AT3G20720.2	-	0.41	0.77	unknown protein; FUNCTIONS IN: molecular_function unknown; INVOLVED IN: biological_process unknown; EXPRESSED IN: 22 plant structures; EXPRESSED DURING: 13 growth stages.	-	-	-		https://www.arabidopsis.org/servlets/TairObject?type=locus&name=AT3G20720	http://www.genoscope.cns.fr/brassicanapus/cgi-bin/geneView?src=colza;name=BnaA05g20220D
				Bra035755	A05	17688120 - 17688605	66557	downstream		BnaA05g20230D	A05	15642682 - 15643788	56561	downstream	AT3G20710.1	-	0.8	0.41	F-box family protein; CONTAINS InterPro DOMAIN/s: F-box domain, cyclin-like (InterPro:IPR001810), F-box domain, Skp2-like (InterPro:IPR022364), F-box associated domain, type 1 (InterPro:IPR006527), F-box associated interaction domain (InterPro:IPR017451); BEST Arabidopsis thaliana protein match is: F-box and associated interaction domains-containing protein (TAIR:AT3G20690.1)	-	-	-		https://www.arabidopsis.org/servlets/TairObject?type=locus&name=AT3G20710	http://www.genoscope.cns.fr/brassicanapus/cgi-bin/geneView?src=colza;name=BnaA05g20230D
				Bra035756	A05	17689575 - 17692775	68012	downstream		BnaA05g20240D	A05	15644138 - 15644862	58017	downstream	AT3G20670.1	-	0.86	0.81	Encodes HTA13, a histone H2A protein.	-	-	-		https://www.arabidopsis.org/servlets/TairObject?type=locus&name=AT3G20670	http://www.genoscope.cns.fr/brassicanapus/cgi-bin/geneView?src=colza;name=BnaA05g20240D
				Bra035757	A05	17699001 - 17701033	77438	downstream		BnaA05g20250D	A05	15645835 - 15649618	59714	downstream	AT3G20660.1	-	0.62	0.86	organic cation/carnitine transporter4 (4-Oct); FUNCTIONS IN: carbohydrate transmembrane transporter activity, sugar:hydrogen symporter activity; INVOLVED IN: transport, transmembrane transport; LOCATED IN: chloroplast thylakoid membrane, membrane; EXPRESSED IN: 13 plant structures; EXPRESSED DURING: 6 growth stages; CONTAINS InterPro DOMAIN/s: Sugar transporter, conserved site (InterPro:IPR005829…	-	-	-		https://www.arabidopsis.org/servlets/TairObject?type=locus&name=AT3G20660	http://www.genoscope.cns.fr/brassicanapus/cgi-bin/geneView?src=colza;name=BnaA05g20250D
				Bra035758	A05	17704562 - 17706981	82999	downstream		BnaA05g20260D	A05	15676657 - 15679420	90536	downstream	AT3G20650.1	-	0.72	0.92	mRNA capping enzyme family protein; FUNCTIONS IN: catalytic activity; INVOLVED IN: mRNA capping; LOCATED IN: chloroplast; EXPRESSED IN: 23 plant structures; EXPRESSED DURING: 14 growth stages; CONTAINS InterPro DOMAIN/s: mRNA (guanine-N(7))-methyltransferase (InterPro:IPR016899), mRNA capping enzyme, large subunit (InterPro:IPR004971); BEST Arabidopsis thaliana protein match is: S-adenosyl-L-meth…	-	-	-		https://www.arabidopsis.org/servlets/TairObject?type=locus&name=AT3G20650	http://www.genoscope.cns.fr/brassicanapus/cgi-bin/geneView?src=colza;name=BnaA05g20260D
				Bra035759	A05	17709209 - 17711623	87646	downstream		BnaA05g20270D	A05	15698096 - 15700853	111975	downstream	AT3G20640.1	-	0.92	0.72	basic helix-loop-helix (bHLH) DNA-binding superfamily protein; FUNCTIONS IN: sequence-specific DNA binding transcription factor activity; INVOLVED IN: regulation of transcription; LOCATED IN: nucleus, chloroplast; CONTAINS InterPro DOMAIN/s: Helix-loop-helix DNA-binding domain (InterPro:IPR001092), Helix-loop-helix DNA-binding (InterPro:IPR011598); BEST Arabidopsis thaliana protein match is: basi…	-	-	-		https://www.arabidopsis.org/servlets/TairObject?type=locus&name=AT3G20640	http://www.genoscope.cns.fr/brassicanapus/cgi-bin/geneView?src=colza;name=BnaA05g20270D
				Bra035760	A05	17721301 - 17722332	99738	downstream		BnaA05g20280D	A05	15701622 - 15705320	115501	downstream	AT5G66290.1	-	0.34	0.79	unknown protein; FUNCTIONS IN: molecular_function unknown; INVOLVED IN: N-terminal protein myristoylation; LOCATED IN: cellular_component unknown; EXPRESSED IN: 14 plant structures; EXPRESSED DURING: 7 growth stages	-	-	-		https://www.arabidopsis.org/servlets/TairObject?type=locus&name=AT5G66290	http://www.genoscope.cns.fr/brassicanapus/cgi-bin/geneView?src=colza;name=BnaA05g20280D
				Bra035761	A05	17730408 - 17732938	108845	downstream		BnaA05g20290D	A05	15708995 - 15714349	122874	downstream	AT3G20630.1	-	0.72	0.87	Encodes a ubiquitin-specific protease. Identical to TTN6. Loss of function mutations are embryo lethals, having development arrested at the preglobular/globular stage. Also involved in root responses to phosphate deficiency.	-	-	-		https://www.arabidopsis.org/servlets/TairObject?type=locus&name=AT3G20630	http://www.genoscope.cns.fr/brassicanapus/cgi-bin/geneView?src=colza;name=BnaA05g20290D
				Bra035762	A05	17737019 - 17742111	115456	downstream		BnaA05g20300D	A05	15732119 - 15734201	145998	downstream	AT3G20620.1	-	0.87	0.44	F-box family protein-related; CONTAINS InterPro DOMAIN/s: F-box associated interaction domain (InterPro:IPR017451)	-	-	-		https://www.arabidopsis.org/servlets/TairObject?type=locus&name=AT3G20620	http://www.genoscope.cns.fr/brassicanapus/cgi-bin/geneView?src=colza;name=BnaA05g20300D
				Bra035763	A05	17746102 - 17747377	124539	downstream		BnaA05g20310D	A05	15749594 - 15751346	163473	downstream	Not found	-	0.45			-	-	-		http://www.genoscope.cns.fr/brassicanapus/cgi-bin/geneView?src=colza;name=BnaA05g20310D	http://www.genoscope.cns.fr/brassicanapus/cgi-bin/geneView?src=colza;name=BnaA05g20310D
				Bra035764	A05	17761505 - 17762714	139942	downstream		BnaA05g20320D	A05	15757058 - 15758754	170937	downstream	AT1G31150.1	-	0.4	0.23	FUNCTIONS IN: sequence-specific DNA binding transcription factor activity; INVOLVED IN: regulation of transcription, DNA-dependent; LOCATED IN: nucleus; EXPRESSED IN: 19 plant structures; EXPRESSED DURING: 6 growth stages; CONTAINS InterPro DOMAIN/s: Domain of unknown function DUF1985 (InterPro:IPR015410), Transcription factor, K-box (InterPro:IPR002487); BEST Arabidopsis thaliana protein match i…	-	-	-		https://www.arabidopsis.org/servlets/TairObject?type=locus&name=AT1G31150	http://www.genoscope.cns.fr/brassicanapus/cgi-bin/geneView?src=colza;name=BnaA05g20320D
				Bra035765	A05	17764142 - 17764772	142579	downstream		BnaA05g20330D	A05	15760854 - 15761370	174733	downstream	AT3G20600.1	-		0.61	Required for non-race specific resistance to bacterial and fungal pathogens.Mediates systemic acquired resistance (SAR) response. The mRNA is cell-to-cell mobile.	-	-	-		https://www.arabidopsis.org/servlets/TairObject?type=locus&name=AT3G20600	http://www.genoscope.cns.fr/brassicanapus/cgi-bin/geneView?src=colza;name=BnaA05g20330D
				Bra035766	A05	17776594 - 17777244	155031	downstream		BnaA05g20340D	A05	15767434 - 15769463	181313	downstream	AT3G20580.1	-	0.58	0.72	COBRA-like protein 10 precursor (COBL10); CONTAINS InterPro DOMAIN/s: Glycosyl-phosphatidyl inositol-anchored, plant (InterPro:IPR006918); BEST Arabidopsis thaliana protein match is: COBRA-like protein 11 precursor (TAIR:AT4G27110.1)	-	-	-		https://www.arabidopsis.org/servlets/TairObject?type=locus&name=AT3G20580	http://www.genoscope.cns.fr/brassicanapus/cgi-bin/geneView?src=colza;name=BnaA05g20340D
				Bra035767	A05	17779993 - 17777244	158430	downstream		BnaA05g20350D	A05	15769852 - 15770580	183731	downstream	AT3G20570.1	-	0.64	0.85	early nodulin-like protein 9 (ENODL9); FUNCTIONS IN: electron carrier activity, copper ion binding; LOCATED IN: anchored to membrane; EXPRESSED IN: 22 plant structures; EXPRESSED DURING: 13 growth stages; CONTAINS InterPro DOMAIN/s: Plastocyanin-like (InterPro:IPR003245), Cupredoxin (InterPro:IPR008972); BEST Arabidopsis thaliana protein match is: early nodulin-like protein 14 (TAIR:AT2G25060.1)	-	-	-		https://www.arabidopsis.org/servlets/TairObject?type=locus&name=AT3G20570	http://www.genoscope.cns.fr/brassicanapus/cgi-bin/geneView?src=colza;name=BnaA05g20350D
				Bra035768	A05	17792711 - 17794184	171148	downstream		BnaA05g20360D	A05	15770667 - 15774932	184546	downstream	AT3G20560.1	-	0.77	0.87	Encodes a protein disulfide isomerase-like (PDIL) protein, a member of a multigene family within the thioredoxin (TRX) superfamily. Unlike several other PDI family members, transcript levels for this gene are not up-regulated in response to three different chemical inducers of ER stress (dithiothreitol, beta-mercaptoethanol, and tunicamycin).	-	-	-		https://www.arabidopsis.org/servlets/TairObject?type=locus&name=AT3G20560	http://www.genoscope.cns.fr/brassicanapus/cgi-bin/geneView?src=colza;name=BnaA05g20360D
				Bra035769	A05	17794612 - 17795288	173049	downstream		BnaA05g20370D	A05	15776196 - 15776864	190075	downstream	AT3G20557.1	-	0.84	0.8	unknown protein; BEST Arabidopsis thaliana protein match is: unknown protein (TAIR:AT1G50930.1)	-	-	-		https://www.arabidopsis.org/servlets/TairObject?type=locus&name=AT3G20557	http://www.genoscope.cns.fr/brassicanapus/cgi-bin/geneView?src=colza;name=BnaA05g20370D
				Bra035770	A05	17795565 - 17799462	174002	downstream		BnaA05g20380D	A05	15778616 - 15779016	192495	downstream	AT3G20550.1	-	0.86	0.6	Encodes a nuclear localized FHA (forhkead) domain containing protein.Mutant plants have shortened roots, delayed flowering time, altered floral organ number, defective floral organs and reduced fertility.Ddl mutants also show reduced levels of pri-miRNAs as well as mature miRNAs suggesting involvement in biogenesis of miRNAs. DDL does not affect transcription of miRNAs directly but may act throug…	-	-	-		https://www.arabidopsis.org/servlets/TairObject?type=locus&name=AT3G20550	http://www.genoscope.cns.fr/brassicanapus/cgi-bin/geneView?src=colza;name=BnaA05g20380D
				Bra035771	A05	17803210 - 17803859	181647	downstream		BnaA05g20390D	A05	15779117 - 15779870	192996	downstream	AT1G50900.1	-	0.8	0.88	Encodes GDC1 (Grana Deficient Chloroplast 1), an ankyrin domain containing protein required fro chloroplast thylakoid grana formation. The mRNA is cell-to-cell mobile.	-	-	-		https://www.arabidopsis.org/servlets/TairObject?type=locus&name=AT1G50900	http://www.genoscope.cns.fr/brassicanapus/cgi-bin/geneView?src=colza;name=BnaA05g20390D
				Bra035772	A05	17806192 - 17806812	184629	downstream		BnaA05g20400D	A05	15780993 - 15788237	194872	downstream	AT3G20540.2	-	0.88	0.8	Encodes an organellar DNA polymerase I that is also involved in double strand break repair.	-	-	-		https://www.arabidopsis.org/servlets/TairObject?type=locus&name=AT3G20540	http://www.genoscope.cns.fr/brassicanapus/cgi-bin/geneView?src=colza;name=BnaA05g20400D
				Bra035773	A05	17808062 - 17812454	186499	downstream		BnaA05g20410D	A05	15790826 - 15792406	204705	downstream	AT3G20530.1	-	0.8	0.85	Protein kinase superfamily protein; FUNCTIONS IN: protein serine/threonine kinase activity, protein kinase activity, kinase activity, ATP binding; INVOLVED IN: protein amino acid phosphorylation; EXPRESSED IN: 9 plant structures; EXPRESSED DURING: L mature pollen stage, M germinated pollen stage, 4 anthesis, C globular stage, petal differentiation and expansion stage; CONTAINS InterPro DOMAIN/s: …	-	-	-		https://www.arabidopsis.org/servlets/TairObject?type=locus&name=AT3G20530	http://www.genoscope.cns.fr/brassicanapus/cgi-bin/geneView?src=colza;name=BnaA05g20410D
				Bra035774	A05	17817318 - 17821958	195755	downstream		BnaA05g20420D	A05	15792827 - 15795802	206706	downstream	AT3G20520.1	-	0.71	0.71	Encodes a member of the glycerophosphodiester phosphodiesterase like (GDPD-like) family.	-	-	-		https://www.arabidopsis.org/servlets/TairObject?type=locus&name=AT3G20520	http://www.genoscope.cns.fr/brassicanapus/cgi-bin/geneView?src=colza;name=BnaA05g20420D
				Bra035775	A05	17822937 - 17823983	201374	downstream		BnaA05g20430D	A05	15796433 - 15797561	210312	downstream	AT3G20510.1	-	0.91	0.62	Encodes a member of the Tmemb_14 family that is predicted to be localized to the membranes of the secretory pathway. The mRNA is cell-to-cell mobile.	-	-	-		https://www.arabidopsis.org/servlets/TairObject?type=locus&name=AT3G20510	http://www.genoscope.cns.fr/brassicanapus/cgi-bin/geneView?src=colza;name=BnaA05g20430D
				Bra035776	A05	17832980 - 17835221	211417	downstream		BnaA05g20440D	A05	15800131 - 15802873	214010	downstream	AT3G20500.1	-	0.89	0.9	purple acid phosphatase 18 (PAP18); FUNCTIONS IN: protein serine/threonine phosphatase activity, acid phosphatase activity; INVOLVED IN: biological_process unknown; LOCATED IN: endomembrane system; EXPRESSED IN: 24 plant structures; EXPRESSED DURING: 13 growth stages; CONTAINS InterPro DOMAIN/s: Metallophosphoesterase (InterPro:IPR004843), Purple acid phosphatase-like, N-terminal (InterPro:IPR008…	-	-	-		https://www.arabidopsis.org/servlets/TairObject?type=locus&name=AT3G20500	http://www.genoscope.cns.fr/brassicanapus/cgi-bin/geneView?src=colza;name=BnaA05g20440D
				Bra035777	A05	17836197 - 17843282	214634	downstream		BnaA05g20450D	A05	15803618 - 15810810	217497	downstream	AT3G20475.1	-	0.85	0.86	Encodes MSH5, a homologue of the MutS-homolog family of genes required for normal levels of recombination in budding yeast, mouse and Caenorhabditis elegans. Involved in meiotic recombination. Required for the formation of Class I interference-sensitive crossovers. Transcripts of AtMSH5 are specific to reproductive tissues and expression of the protein is abundant during prophase I of meiosis. In…	-	-	-		https://www.arabidopsis.org/servlets/TairObject?type=locus&name=AT3G20475	http://www.genoscope.cns.fr/brassicanapus/cgi-bin/geneView?src=colza;name=BnaA05g20450D
UQnapus2473	A07	11614849	A07; 15175322 - 15175273	Bra015593	A10	302446 - 302768			A07; 1352636-1352685	BnaA07g01640D	A07	1282011 - 1282333	-70303	upstream	no hits		NA			-	-	-
				Bra015593	A10	302446 - 302768				BnaA07g01650D	A07	1282392 - 1288249	-64387	upstream	AT3G48800.1	Sterile alpha motif (SAM) domain-containing protein	NA	0.66	Sterile alpha motif (SAM) domain-containing protein; CONTAINS InterPro DOMAIN/s: Sterile alpha motif-type (InterPro:IPR013761), Sterile alpha motif (InterPro:IPR001660), Sterile alpha motif homology (InterPro:IPR010993), Sterile alpha motif, type 2 (InterPro:IPR011510); BEST Arabidopsis thaliana protein match is: Sterile alpha motif (SAM) domain-containing protein (TAIR:AT5G23680.1)	-	-	-
				Bra038828	A07	1075139 - 1078308	-14100183	upstream		BnaA07g01660D	A07	1291613 - 1294882	-57754	upstream	AT2G18890.1	Protein kinase superfamily protein	0.79	0.79	Protein kinase superfamily protein; FUNCTIONS IN: protein serine/threonine kinase activity, protein kinase activity, kinase activity, ATP binding; INVOLVED IN: protein amino acid phosphorylation; EXPRESSED IN: 22 plant structures; EXPRESSED DURING: 12 growth stages; CONTAINS InterPro DOMAIN/s: Protein kinase, ATP binding site (InterPro:IPR017441), Protein kinase, catalytic domain (InterPro:IPR000…	-	-	-
										BnaA07g01670D	A07	1295441 - 1295796	-56840	upstream	AT5G42640.1/AT2G15740.1/AT5G42640.1	C2H2 and C2HC zinc fingers superfamily protein		0.67	C2H2 and C2HC zinc fingers superfamily protein; FUNCTIONS IN: sequence-specific DNA binding transcription factor activity, zinc ion binding, nucleic acid binding; INVOLVED IN: regulation of transcription; LOCATED IN: intracellular; CONTAINS InterPro DOMAIN/s: Zinc finger, C2H2-like (InterPro:IPR015880), Zinc finger, C2H2-type (InterPro:IPR007087); BEST Arabidopsis thaliana protein match is: C2H2-…	-	-	-
				Bra039606	A07	1348845 - 1349342	-13826477	upstream		BnaA07g01680D	A07	1295864 - 1296361	-56275	upstream	AT2G18490.1/AT2G15740.1/AT5G42640.1	C2H2-like zinc finger protein	0.59	0.59	C2H2-like zinc finger protein; FUNCTIONS IN: sequence-specific DNA binding transcription factor activity, zinc ion binding, nucleic acid binding; INVOLVED IN: regulation of transcription; LOCATED IN: intracellular; CONTAINS InterPro DOMAIN/s: Zinc finger, C2H2-like (InterPro:IPR015880), Zinc finger, C2H2-type (InterPro:IPR007087); BEST Arabidopsis thaliana protein match is: C2H2-like zinc finger …	-	-	-
				Bra039605	A07	1346717 - 1347649	-13828605	upstream		BnaA07g01690D	A07	1297557 - 1300010	-52626	upstream	AT5G09920.1	RPB15.9, ATRPB15.9, RPB15.9.9, NRPB4 | RNA polymerase II, Rpb4, core protein	0.91	0.9	Non-catalytic subunit specific to DNA-dependent RNA polymerase II; the ortholog of budding yeast RPB4)	-	-	-
				Bra039604	A07	1327604 - 1328551	-13847718	upstream		BnaA07g01700D	A07	1316218 - 1317165	-35471	upstream	AT2G18500.1	ATOFP7, OFP7 | ovate family protein 7	0.69	69%	ovate family protein 7 (OFP7); INVOLVED IN: biological_process unknown; LOCATED IN: plasma membrane; EXPRESSED IN: shoot apex, embryo, hypocotyl, flower, seed; EXPRESSED DURING: F mature embryo stage, petal differentiation and expansion stage, E expanded cotyledon stage, D bilateral stage; CONTAINS InterPro DOMAIN/s: Protein of unknown function DUF623 (InterPro:IPR006458); BEST Arabidopsis thalia…	-	-	-
				Bra039603	A07	1323148 - 1325698	-13852174	upstream		BnaA07g01710D	A07	1318847 - 1321620	-31016	upstream	AT2G18510.1	emb2444 | RNA-binding (RRM/RBD/RNP motifs) family protein	0.9	90%	embryo defective 2444 (emb2444); FUNCTIONS IN: RNA binding, nucleotide binding, nucleic acid binding; INVOLVED IN: embryo development ending in seed dormancy; LOCATED IN: nucleolus; EXPRESSED IN: 23 plant structures; EXPRESSED DURING: 14 growth stages; CONTAINS InterPro DOMAIN/s: RNA recognition motif, RNP-1 (InterPro:IPR000504), Nucleotide-binding, alpha-beta plait (InterPro:IPR012677); BEST Ara…	-	-	-
				Bra028100	A07	1307322 - 1308797	-13868000	upstream		BnaA07g01720D	A07	1340971 - 1342710	-9926	upstream	AT4G36710.1	GRAS family transcription factor	0.72	71%	GRAS family transcription factor; CONTAINS InterPro DOMAIN/s: Transcription factor GRAS (InterPro:IPR005202); BEST Arabidopsis thaliana protein match is: GRAS family transcription factor (TAIR:AT4G00150.1)	-	-	-
				Bra028098	A07	1261803 - 1263236	-13913519	upstream		BnaA07g01730D	A07	1402205 - 1403778	49569	downstream	AT2G18570.1 /AT2G18560.1	UDP-Glycosyltransferase superfamily protein	0.8	78%	UDP-Glycosyltransferase superfamily protein; FUNCTIONS IN: transferase activity, transferring glycosyl groups; INVOLVED IN: metabolic process; LOCATED IN: cellular_component unknown; CONTAINS InterPro DOMAIN/s: UDP-glucuronosyl/UDP-glucosyltransferase (InterPro:IPR002213); BEST Arabidopsis thaliana protein match is: UDP-Glycosyltransferase superfamily protein (TAIR:AT2G18560.1)	-	-	-
UQnapus2637	A08	2617392	A08; 18243234-18243185	Bra016510/Bra016511	A08	18037982 -18038895 /18043201 - 18044144	-205252	upstream	A08; 16360884-16360933	BnaA08g22090D	A08	16171074 - 16171990	-189810	upstream	AT2G24810.1	Pathogenesis-related thaumatin superfamily protein	66%/66%	0.56	Pathogenesis-related thaumatin superfamily protein; FUNCTIONS IN: molecular_function unknown; INVOLVED IN: response to other organism; LOCATED IN: endomembrane system; CONTAINS InterPro DOMAIN/s: Thaumatin, pathogenesis-related (InterPro:IPR001938); BEST Arabidopsis thaliana protein match is: Pathogenesis-related thaumatin superfamily protein (TAIR:AT1G19320.1)	-	-	-
				Bra025726/Bra016512	A06/A08	7232560 - 7233618 / 18049167-18050222	-194067	upstream		BnaA08g22100D	A08	16176921 - 16178178	-183963	upstream	AT1G19300.1	GATL1, PARVUS, GLZ1, ATGATL1	84%/80%	80%	The PARVUS/GLZ1 gene encodes a putative family 8 glycosyl transferase that contributes to xylan biosynthesis. Its gene expression shows good co-variance with the IRX3 gene involved in secondary cell wall synthesis. PARVUS/GLZ1 is predicted to have galacturonosyltransferase activity and may be involved in the formation of the complex oligosaccharide sequence present at the reducing end of xylan. P…	-	-	-
				Bra016513	A08	18052614 - 18055271	-190620	upstream		BnaA08g22110D	A08	16180451 - 16183108	-180433	upstream	AT1G19290.1	Pentatricopeptide repeat (PPR) superfamily protein	0.72	0.52	Pentatricopeptide repeat (PPR) superfamily protein; LOCATED IN: mitochondrion; EXPRESSED IN: 12 plant structures; EXPRESSED DURING: 6 growth stages; CONTAINS InterPro DOMAIN/s: Pentatricopeptide repeat (InterPro:IPR002885); BEST Arabidopsis thaliana protein match is: Pentatricopeptide repeat (PPR) superfamily protein (TAIR:AT5G55840.1)	-	-	-
				Bra016514	A08	18056389 - 18058631	-186845	upstream		BnaA08g22120D	A08	16184139 - 16186697	-176745	upstream	AT1G19270.1 /AT2G39830.1	DA1 | DA1 / DAR2 | DA1-related protein 2 / LIM domain-containing protein	0.86	76%	DA1 is a member of a small (7 member) ubiquitin binding protein family. It appears to play a role in regulation of endoreduplication in leaf epidermal tissue. / Essential for early phloem development and function, and for root system development.DAR2 is a member of a small (7 member) ubiquitin binding protein family. It appears to play a role in regulation of endoreduplication in leaf epidermal t…	-	-	-
				Bra016515	A08	18064726 - 18067341	-178508	upstream		BnaA08g22130D	A08	16191743 - 16194172	-169141	upstream	AT1G19250.1 / AT5G45180.1	FMO1 | flavin-dependent monooxygenase 1	0.88	88%	FMO1 is required for full expression of TIR-NB-LRR-conditioned resistance to avirulent pathogens and for basal resistance to invasive virulent pathogens. Functions in an EDS1-regulated but SA-independent mechanism that promotes resistance and cell death at pathogen infection sites.	-	-	-
				Bra016516	A08	18073572 - 18074154	-169662	upstream		BnaA08g22140D	A08	16201638 - 16203890	-159246	upstream	AT5G66540.1	FUNCTIONS IN: molecular_function unknown	0.29	0.31	FUNCTIONS IN: molecular_function unknown; INVOLVED IN: rRNA processing; LOCATED IN: cytosol, nucleolus, nucleus; EXPRESSED IN: 22 plant structures; EXPRESSED DURING: 12 growth stages; CONTAINS InterPro DOMAIN/s: U3 small nucleolar ribonucleoprotein complex, subunit Mpp10p (InterPro:IPR012173), Mpp10 protein (InterPro:IPR007151)	-	-	-
				Bra016517	A08	18076834 - 18081092	-166400	upstream		BnaA08g22150D	A08	16205885 - 16210215	-154999	upstream	AT1G19220.1	ARF19, IAA22, ARF11 | auxin response factor 19	0.85	88%	Encodes an auxin response factor that contains the conserved VP1-B3 DNA-binding domain at its N-terminus and the Aux/IAA-like domains III and IV present in most ARFs at its C-terminus. The protein interacts with IAA1 (yeast two hybrid) and other auxin response elements such as ER7 and ER9 (yeast one hybrid). ARF19 protein can complement many aspects of the arf7 mutant phenotype and , together wit…	-	-	-
				Bra016518	A08	18081768 - 18082139	-161466	upstream		BnaA08g22160D	A08	16210758 - 16211288	-150126	upstream	AT1G19210.1	Integrase-type DNA-binding superfamily protein	0.77	0.74	encodes a member of the DREB subfamily A-5 of ERF/AP2 transcription factor family. The protein contains one AP2 domain. There are 15 members in this subfamily including RAP2.1, RAP2.9 and RAP2.10.	-	-	-
				Bra016519	A08	18083124 - 18084107	-160110	upstream		BnaA08g22170D	A08	16211973 - 16212950	-148911	upstream	AT1G19190.1	alpha/beta-Hydrolases superfamily protein	0.64	0.65	alpha/beta-Hydrolases superfamily protein; FUNCTIONS IN: hydrolase activity; INVOLVED IN: metabolic process; LOCATED IN: cellular_component unknown; EXPRESSED IN: inflorescence meristem, root, flower; EXPRESSED DURING: petal differentiation and expansion stage; CONTAINS InterPro DOMAIN/s: Lipase, GDXG, active site (InterPro:IPR002168), Alpha/beta hydrolase fold-3 (InterPro:IPR013094); BEST Arabid…	-	-	-
				Bra016520	A08	18085225 - 18086349	-158009	upstream		BnaA08g22180D	A08	16213647 - 16215236	-147237	upstream	AT1G19180.1	JAZ1, TIFY10A | jasmonate-zim-domain protein 1	0.69	0.72	JAZ1 is a nuclear-localized protein involved in jasmonate signaling. JAZ1 transcript levels rise in response to a jasmonate stimulus. JAZ1 can interact with the COI1 F-box subunit of an SCF E3 ubiquitin ligase in a yeast-two-hybrid assay only in the presence of jasmonate-isoleucine (JA-ILE) or coronatine. Application of jasmonate methyl ester to Arabidopsis roots reduces the levels of a JAZ1:GUS …	-	-	-
				Bra016521	A08	18089768 - 18092204	-153466	upstream		BnaA08g22190D	A08	16218190 - 16220795	-142694	upstream	AT1G19170.1	Pectin lyase-like superfamily protein	0.81	81%	Pectin lyase-like superfamily protein; FUNCTIONS IN: polygalacturonase activity; INVOLVED IN: carbohydrate metabolic process; LOCATED IN: mitochondrion; EXPRESSED IN: 22 plant structures; EXPRESSED DURING: 13 growth stages; CONTAINS InterPro DOMAIN/s: Pectin lyase fold/virulence factor (InterPro:IPR011050), Parallel beta-helix repeat (InterPro:IPR006626), Pectin lyase fold (InterPro:IPR012334), G…	-	-	-
				Bra016522	A08	18093364 - 18094318	-149870	upstream		BnaA08g22200D	A08	16221585 - 16222809	-139299	upstream	AT1G19150.1	LHCA6, LHCA2*1 | photosystem I light harvesting complex gene 6	0.88	87%	PSI type II chlorophyll a/b-binding protein (Lhca2*1) mRNA, The mRNA is cell-to-cell mobile.	-	-	-
				Bra016523	A08	18094804 - 18096133	-148430	upstream		BnaA08g22210D	A08	16223178 - 16224674	-137706	upstream	AT1G19140.1	FUNCTIONS IN: molecular_function unknown	0.83	78%	FUNCTIONS IN: molecular_function unknown; INVOLVED IN: ubiquinone biosynthetic process; LOCATED IN: mitochondrion; EXPRESSED IN: 24 plant structures; EXPRESSED DURING: 15 growth stages; CONTAINS InterPro DOMAIN/s: COQ9 (InterPro:IPR013718), Ubiquinone biosynthesis protein COQ9 (InterPro:IPR012762)	-	-	-
				Bra016524	A08	18096583 - 18097502	-146651	upstream		BnaA08g22220D	A08	16224889 - 16226060	-135995	upstream	AT1G19130.1	CONTAINS InterPro DOMAIN/s: Protein of unknown	0.89	89%	CONTAINS InterPro DOMAIN/s: Protein of unknown function DUF985 (InterPro:IPR009327), RmlC-like jelly roll fold (InterPro:IPR014710)	-	-	-
				Bra016525	A08	18098716 - 18101915	-144518	upstream		BnaA08g22230D	A08	16226932 - 16230682	-133952	upstream	AT1G19110.1	inter-alpha-trypsin inhibitor heavy chain-related	0.77	82%	inter-alpha-trypsin inhibitor heavy chain-related; FUNCTIONS IN: molecular_function unknown; INVOLVED IN: biological_process unknown; LOCATED IN: plasma membrane, membrane; EXPRESSED IN: 24 plant structures; EXPRESSED DURING: 15 growth stages; CONTAINS InterPro DOMAIN/s: von Willebrand factor, type A (InterPro:IPR002035); BEST Arabidopsis thaliana protein match is: unknown protein (TAIR:AT1G72500…	-	-	-
				Bra016526	A08	18109570 - 18110672	-133664	upstream		BnaA08g22240D	A08	16235751 - 16237373	-125133	upstream	AT1G19050.1	ARR7 | response regulator 7	0.79	79%	Encodes a member of the Arabidopsis response regulator (ARR) family, most closely related to ARR15. A two-component response regulator protein containing a phosphate accepting domain in the receiver domain but lacking a DNA binding domain in the output domain. Involved in response to cytokinin and meristem stem cell maintenance. Arr7 protein is stabilized by cytokinin.	-	-	-
				Bra016527	A08	18113764 - 18114435	-129470	upstream		BnaA08g22250D	A08	16240179 - 16240850	-120705	upstream	AT1G21960.1/AT5G53910.1	RING/U-box superfamily protein	0.36	0.36	RING/U-box superfamily protein; FUNCTIONS IN: zinc ion binding; CONTAINS InterPro DOMAIN/s: Zinc finger, RING-type (InterPro:IPR001841), Zinc finger, C3HC4 RING-type (InterPro:IPR018957); BEST Arabidopsis thaliana protein match is: Zinc finger, C3HC4 type (RING finger) family protein (TAIR:AT1G18760.1)	-	-	-
				Bra016528	A08	18115178 - 18115402	-128056	upstream		BnaA08g22260D	A08	16241593 - 16241817	-119291	upstream	AT1G19020.1	unknown protein	0.7	0.7	unknown protein; BEST Arabidopsis thaliana protein match is: unknown protein (TAIR:AT3G48180.1)	-	-	-
								upstream		BnaA08g22270D	A08	16242344 - 16243264	-118540	upstream	AT4G30064.1 /AT1G73603.1/AT1G49715.1/AT1G73607.1	LCR61 | low-molecular-weight cysteine-rich 61/Defensin-like (DEFL) family protein/LCR65 | low-molecular-weight cysteine-rich 65		0.5	Encodes a member of a family of small,secreted, cysteine rich protein with sequence similarity to the PCP (pollen coat protein) gene family.	-	-	-
				Bra016529	A08	18118263 - 18119692	-124971	upstream		BnaA08g22280D	A08	16244556 - 16246120	-116328	upstream	AT1G19010.1	unknown protein	0.64	0.64	unknown protein; BEST Arabidopsis thaliana protein match is: unknown protein (TAIR:AT1G74860.1)	-	-	-
				Bra016530	A08	18123670 - 18124981	-119564	upstream		BnaA08g22290D	A08	16249906 - 16251808	-110978	upstream	AT1G19000.2/AT4G09450.1	Homeodomain-like superfamily protein/Duplicated homeodomain-like superfamily protein	0.6	0.6	Homeodomain-like superfamily protein; FUNCTIONS IN: DNA binding, sequence-specific DNA binding transcription factor activity; INVOLVED IN: regulation of transcription, DNA-dependent; EXPRESSED IN: 23 plant structures; EXPRESSED DURING: 13 growth stages; CONTAINS InterPro DOMAIN/s: SANT, DNA-binding (InterPro:IPR001005), Homeodomain-like (InterPro:IPR009057), Myb, DNA-binding (InterPro:IPR014778),…	-	-	-
				Bra016531	A08	18127045 - 18127695	-116189	upstream		BnaA08g22300D	A08	16253389 - 16254490	-107495	upstream	AT1G18960.1	myb-like HTH transcriptional regulator family protein	0.68	0.71	myb-like HTH transcriptional regulator family protein; FUNCTIONS IN: DNA binding, sequence-specific DNA binding transcription factor activity; INVOLVED IN: regulation of transcription, DNA-dependent, regulation of transcription; CONTAINS InterPro DOMAIN/s: SANT, DNA-binding (InterPro:IPR001005), Homeodomain-like (InterPro:IPR009057), Myb, DNA-binding (InterPro:IPR014778), HTH transcriptional regu…	-	-	-
				Bra016532	A08	18129147-18133179	-114087	upstream		BnaA08g22310D	A08	16255074 - 16259503	-105810	upstream	AT1G18950.1	DDT domain superfamily	0.67	0.67	DDT domain superfamily; CONTAINS InterPro DOMAIN/s: DDT domain (InterPro:IPR004022); BEST Arabidopsis thaliana protein match is: unknown protein (TAIR:AT5G25580.1)	-	-	-
				Bra016533	A08	18134806-18137121	-108428	upstream		BnaA08g22320D	A08	16260970 - 16263948	-99914	upstream	AT1G18900.3	Pentatricopeptide repeat (PPR) superfamily protein	0.66	0.66	Pentatricopeptide repeat (PPR) superfamily protein; EXPRESSED IN: 15 plant structures; EXPRESSED DURING: 6 growth stages; CONTAINS InterPro DOMAIN/s: Pentatricopeptide repeat (InterPro:IPR002885), Smr protein/MutS2 C-terminal (InterPro:IPR002625); BEST Arabidopsis thaliana protein match is: Pentatricopeptide repeat (PPR) superfamily protein (TAIR:AT1G74750.1).	-	-	-
				Bra016534	A08	18138173-18145656	-105061	upstream		BnaA08g22330D	A08	16264503 - 16268373	-96381	upstream	AT1G18880.1	Major facilitator superfamily protein	0.84	83%	Encodes a low-afﬁnity plasma membrane nitrate transporter expressed in the companion cells of root phloem.	-	-	-
				Bra016534	A08	18138173-18145656	-105061	upstream		BnaA08g22340D	A08	16268445 - 16272341	-92439	upstream	AT1G18870.1 /AT1G74710.2	ICS2, ATICS2 | isochorismate synthase 2/EDS16	0.84	77%	Encodes a protein with isochorismate synthase activity involved in phylloquinone biosynthesis. Mutant studies of this gene's function suggest that its function is redundant with that of ICS1 (AT1G7410).	-	-	-
				Bra016535	A08	18146779-18148677	-96455	upstream		BnaA08g22350D	A08	16273213 - 16275827	-87671	upstream	AT1G18860.1	WRKY61, ATWRKY61 | WRKY DNA-binding protein 61	0.61	0.63	member of WRKY Transcription Factor; Group II-b	-	-	-
				Bra016536/Bra008163	A08/A02	18151702-18155429/12536342-12538420	-91532	upstream		BnaA08g22360D	A08	16278101 - 16282137	-82783	upstream	AT1G18840.2/AT4G39790.1	IQD30 | IQ-domain 30/Protein of unknown function (DUF630 and DUF632)	65%/64%	0.65	IQ-domain 30 (IQD30); FUNCTIONS IN: calmodulin binding; INVOLVED IN: biological_process unknown; LOCATED IN: vacuole; EXPRESSED IN: 22 plant structures; EXPRESSED DURING: 13 growth stages; CONTAINS InterPro DOMAIN/s: IQ calmodulin-binding region (InterPro:IPR000048); BEST Arabidopsis thaliana protein match is: IQ-domain 31 (TAIR:AT1G74690.1)	-	-	-
				Bra016537	A08	18156684 - 18156971	-86550	upstream		BnaA08g22370D	A08	16283131 - 16283510	-77753	upstream	AT1G69588.1	CLE45 | CLAVATA3/ESR-RELATED 45	0.27	0.27	Belongs to a large gene family, called CLE for CLAVATA3/ESR-related, encoding small peptides with conserved carboxyl termini	-	-	-
				Bra016538	A08	18159258 - 18159524	-83976	upstream		BnaA08g22380D	A08	16285706 - 16285972	-75178	upstream	AT1G18835.1	MIF3 | mini zinc finger	0.8	0.8	Encodes a small zinc ﬁnger protein whose overexpression induces ectopic meristem formation on leaf margins.	-	-	-
				Bra016539	A08	18162008 - 18166623	-81226	upstream		BnaA08g22390D	A08	16288023 - 16293073	-72861	upstream	AT1G18830.1	Transducin/WD40 repeat-like superfamily protein	0.66	0.66	Transducin/WD40 repeat-like superfamily protein; FUNCTIONS IN: nucleotide binding; LOCATED IN: endomembrane system; CONTAINS InterPro DOMAIN/s: WD40 repeat 2 (InterPro:IPR019782), WD40 repeat, conserved site (InterPro:IPR019775), WD40 repeat (InterPro:IPR001680), WD40 repeat-like-containing domain (InterPro:IPR011046), WD40-repeat-containing domain (InterPro:IPR017986), WD40/YVTN repeat-like-cont…	-	-	-
				Bra016540	A08	18169101 - 18170186	-74133	upstream		BnaA08g22400D	A08	16295353 - 16296771	-65531	upstream	AT1G18810.1	phytochrome kinase substrate-related	0.64	0.61	phytochrome kinase substrate-related; BEST Arabidopsis thaliana protein match is: phytochrome kinase substrate 1 (TAIR:AT2G02950.1)	-	-	-
				Bra016541	A08	18173750 - 18175578	-69484	upstream		BnaA08g22410D	A08	16298736 - 16300905	-62148	upstream	AT1G18800.1/AT1G74560.3	NRP2 | NAP1-related protein 2/NRP1 | NAP1-related protein 1	0.93	86%	Double nrp1-1 nrp2-1 mutants show arrest of cell cycle progression at G2/M and disordered cellular organization occurred in root tips. Localize in the nucleus and can form homomeric and heteromeric protein complexes with NRP1. Bind histones Histone2A and Histone2B and associate with chromatin in vivo.	-	-	-
				Bra016542	A08	18177004 - 18178280	-66230	upstream		BnaA08g22420D	A08	16302150 - 16303404	-58734	upstream	AT1G18790.1	RWP-RK domain-containing protein	0.56	0.56	RWP-RK domain-containing protein; CONTAINS InterPro DOMAIN/s: Plant regulator RWP-RK (InterPro:IPR003035); BEST Arabidopsis thaliana protein match is: RWP-RK domain-containing protein (TAIR:AT1G74480.1)	-	-	-
				Bra016543	A08	18179316 - 18179741	-63918	upstream		BnaA08g22430D	A08	16304442 - 16304870	-56442	upstream	AT1G18760.1	Zinc finger, C3HC4 type (RING finger) family protein	0.4	0.38	Zinc finger, C3HC4 type (RING finger) family protein; FUNCTIONS IN: zinc ion binding; CONTAINS InterPro DOMAIN/s: Zinc finger, RING-type (InterPro:IPR001841), Zinc finger, C3HC4 RING-type (InterPro:IPR018957), Ubiquitin interacting motif (InterPro:IPR003903); BEST Arabidopsis thaliana protein match is: RING/U-box superfamily protein (TAIR:AT3G13228.1)	-	-	-
				Bra016542	A08	18177004 - 18178280	-66230	upstream		BnaA08g22440D	A08	16304946 - 16307283	-55938	upstream	AT1G18790.1	RWP-RK domain-containing protein	0.56	0.57	RWP-RK domain-containing protein	-	-	-
				Bra016543	A08	18179316 - 18179741	-63918	upstream		BnaA08g22450D	A08	16308334 - 16308759	-52550	upstream	AT1G18760.1	Zinc finger, C3HC4 type (RING finger) family protein	0.4	0.39	Zinc finger, C3HC4 type (RING finger) family protein; FUNCTIONS IN: zinc ion binding; CONTAINS InterPro DOMAIN/s: Zinc finger, RING-type (InterPro:IPR001841), Zinc finger, C3HC4 RING-type (InterPro:IPR018957), Ubiquitin interacting motif (InterPro:IPR003903); BEST Arabidopsis thaliana protein match is: RING/U-box superfamily protein (TAIR:AT3G13228.1)	-	-	-
				Bra016544	A08	18180180 - 18182302	-63054	upstream		BnaA08g22460D	A08	16309106 - 16311362	-51778	upstream	AT1G18750.1	AGL65 | AGAMOUS-like 65	0.61	75%	Encodes a member of the MIKC (MADS box, Keratin binding domain, and C terminal domain containing )family of transcriptional regulators. AGL65 is expressed in pollen.It forms heterodimers with other MICK family members (AGL104). Involved in late stages of pollen development and pollen tube growth.	-	-	-
				Bra016546	A08	18201549 - 18206160	-41685	upstream		BnaA08g22470D	A08	16321631 - 16321705	-39253	upstream	AT1G18710.1	AtMYB47	0.64	NA	Member of the R2R3 factor gene family.	-	-	-
				Bra016546	A08	18201549 - 18206160	-41685	upstream		BnaA08g22480D	A08	16321891 - 16324134	-38993	upstream	AT1G18710.1	AtMYB47, MYB47 | myb domain protein 47	0.64	77%	Member of the R2R3 factor gene family.	-	-	-
				Bra016547	A08	18217368 - 18222192	-25866	upstream		BnaA08g22490D	A08	16333874 - 16338770	-27010	upstream	AT1G18670.1	IBS1 | Protein kinase superfamily protein	0.81	83%	Encodes a cyclin-dependent kinase-like protein with a ser/thr protein kinase domain and an N-terminal myristoylation sequence. Mutants in this gene are unable to express female sterility in response to beta-aminobutyric acid, as wild type plants do.	-	-	-
				Bra016548	A08	18223302 - 18226990	-19932	upstream		BnaA08g22500D	A08	16339661 - 16341434	-21223	upstream	AT1G18650.1	PDCB3 | plasmodesmata callose-binding protein 3	0.71	0.73	Encodes a member of the X8-GPI family of proteins. It localizes to the plasmodesmata and is predicted to bind callose.	-	-	-
				Bra016548	A08	18223302 - 18226990	-19932	upstream		BnaA08g22510D	A08	16341583 - 16343569	-19301	upstream	AT1G18640.2	PSP | 3-phosphoserine phosphatase	0.92	88%	Encodes a 3-phosphoserine phosphatase acting in the last step of serine biosynthesis within the chloroplast. Essential for embryo, pollen and root development.	-	-	-
										BnaA08g22520D	A08	16343626 - 16345292	-17258	upstream	AT1G18630.1	GR-RBP6 | glycine-rich RNA-binding protein 6	NA	80%	encodes a glycine-rich RNA binding protein	-	-	-
										BnaA08g22530D	A08	16345426 - 16349036	-15458	upstream	AT1G18620.1	unknown protein	NA	0.56	unknown protein; FUNCTIONS IN: molecular_function unknown; INVOLVED IN: biological_process unknown; LOCATED IN: cellular_component unknown; EXPRESSED IN: 22 plant structures; EXPRESSED DURING: 13 growth stages; BEST Arabidopsis thaliana protein match is: unknown protein (TAIR:AT1G74160.1)	-	-	-
										BnaA08g22540D	A08	16350827 - 16352858	-10057	upstream	AT4G26190.1	Haloacid dehalogenase-like hydrolase (HAD) superfamily	NA	0.67	Haloacid dehalogenase-like hydrolase (HAD) superfamily protein; CONTAINS InterPro DOMAIN/s: NLI interacting factor (InterPro:IPR004274); BEST Arabidopsis thaliana protein match is: Haloacid dehalogenase-like hydrolase (HAD) superfamily protein (TAIR:AT2G36540.1)	-	-	-
				Bra016550	A08	18236251-18238816	-6983	upstream		BnaA08g22550D	A08	16354128 - 16357124	-6756	upstream	AT1G18610.1	Galactose oxidase/kelch repeat superfamily protein	0.73	0.72	Galactose oxidase/kelch repeat superfamily protein; CONTAINS InterPro DOMAIN/s: Galactose oxidase/kelch, beta-propeller (InterPro:IPR011043), Kelch repeat type 1 (InterPro:IPR006652), Kelch repeat type 2 (InterPro:IPR011498), Kelch-type beta propeller (InterPro:IPR015915); BEST Arabidopsis thaliana protein match is: Galactose oxidase/kelch repeat superfamily protein (TAIR:AT1G74150.1)	-	-	-
				Bra016551	A08	18239983-18240966	-3251	upstream		BnaA08g22560D	A08	16358140 - 16359126	-2744	upstream	AT1G33010.1 /AT1G30920.1/AT3G47030.1	F-box and associated interaction domains-containing protein	0.41	0.41	F-box and associated interaction domains-containing protein; CONTAINS InterPro DOMAIN/s: F-box domain, cyclin-like (InterPro:IPR001810), F-box domain, Skp2-like (InterPro:IPR022364), F-box associated domain, type 3 (InterPro:IPR013187), F-box associated interaction domain (InterPro:IPR017451); BEST Arabidopsis thaliana protein match is: F-box and associated interaction domains-containing protein …	-	-	-
				Bra016552	A08	18242211-18244315	1023	Gene		BnaA08g22570D	A08	16359827 - 16362314	1057	Gene	AT1G18580.1	GAUT11 | galacturonosyltransferase 11	0.88	0.9	Encodes a protein with putative galacturonosyltransferase activity.GAUT11 is required for pectin synthesis in seed coat epidermal cells and normal mucilage release.	-	-	-
				Bra016553	A08	18248352-18249890	5118	downstream		BnaA08g22580D	A08	16365931 - 16368003	5047	downstream	AT1G18570.1	MYB51, AtMYB51, BW51A, BW51B, HIG1 | myb domain protein 51	0.68	0.68	Encodes a member of the R2R3-MYB transcription family. Involved in indole glucosinolate biosynthesis. The mRNA is cell-to-cell mobile.	-	-	-
				Bra031034/Bra025895/Bra016555	A09/A06/A08	34598669-34599886/6819463-6820568/18257098-18258356	13864	downstream		BnaA08g22590D/AT1G18540.1	A08	16370507 - 16371890	9623	downstream	AT1G74050.1	Ribosomal protein L6 family protein	82%/84%/81%	79%	Ribosomal protein L6 family protein; FUNCTIONS IN: structural constituent of ribosome; INVOLVED IN: translation; LOCATED IN: ribosome, cytosolic large ribosomal subunit, intracellular, plasma membrane, membrane; EXPRESSED IN: leaf; CONTAINS InterPro DOMAIN/s: Ribosomal protein L6, N-terminal (InterPro:IPR005568), Ribosomal protein L6E (InterPro:IPR000915); BEST Arabidopsis thaliana protein match …	-	-	-
				Bra016556	A08	18259594-18260567	16360	downstream		BnaA08g22600D	A08	16372130 - 16373255	11246	downstream	AT1G18520.1	TET11 | tetraspanin11 |	0.84	84%	Member of TETRASPANIN family	-	-	-
										BnaA08g22610D	A08	16374056 - 16375395	13172	downstream	AT1G18480.1	Calcineurin-like metallo-phosphoesterase superfamily protein	NA	76%	Calcineurin-like metallo-phosphoesterase superfamily protein; FUNCTIONS IN: hydrolase activity, protein serine/threonine phosphatase activity; INVOLVED IN: biological_process unknown; LOCATED IN: cellular_component unknown; EXPRESSED IN: 24 plant structures; EXPRESSED DURING: 15 growth stages; CONTAINS InterPro DOMAIN/s: Metallophosphoesterase (InterPro:IPR004843); BEST Arabidopsis thaliana prote…	-	-	-
				Bra016557	A08	18267539-18271178	24305	downstream		BnaA08g22620D	A08	16379036 - 16383107	18152	downstream	AT1G18470.1	Transmembrane Fragile-X-F-associated protein	0.71	82%	Transmembrane Fragile-X-F-associated protein; FUNCTIONS IN: zinc ion binding; LOCATED IN: endomembrane system; EXPRESSED IN: 24 plant structures; EXPRESSED DURING: 13 growth stages; CONTAINS InterPro DOMAIN/s: Transmembrane Fragile-X-F-associated protein (InterPro:IPR019396), Zinc finger, RING-type (InterPro:IPR001841); BEST Arabidopsis thaliana protein match is: Transmembrane Fragile-X-F-associa…	-	-	-
										BnaA08g22630D/AT1G73920.1	A08	16383283 - 16386866	22399	downstream	AT1G18460.1	alpha/beta-Hydrolases superfamily protein	NA	0.74	alpha/beta-Hydrolases superfamily protein; FUNCTIONS IN: lipase activity; INVOLVED IN: glycerol biosynthetic process, lipid metabolic process; EXPRESSED IN: 23 plant structures; EXPRESSED DURING: 13 growth stages; CONTAINS InterPro DOMAIN/s: AB-hydrolase-associated lipase region (InterPro:IPR006693); BEST Arabidopsis thaliana protein match is: alpha/beta-Hydrolases superfamily protein (TAIR:AT1G7…	-	-	-
										BnaA08g22640D	A08	16387432 - 16391170	26548	downstream	AT1G18450.1	ATARP4, ARP4 | actin-related protein 4	NA	94%	Encodes a gene similar to actin-related proteins in other organisms. Member of nuclear ARP family of genes. Component of chromatin remodeling complexes, involved in chromatin-mediated gene regulation. Phenotype of the arp4-1 mutant allele revealed partial sterility due to defects in anther development. Targeting the distinct, 3' UTR of AtARP4 transcripts with RNA interference caused a drastic red…	-	-	-
				Bra016558	A08	18285258-18290495	42024	downstream		BnaA08g22650D	A08	16393345 - 16396031	32461	downstream	AT1G18360.1	alpha/beta-Hydrolases superfamily protein	0.9	79%	alpha/beta-Hydrolases superfamily protein; FUNCTIONS IN: hydrolase activity; LOCATED IN: chloroplast; EXPRESSED IN: 22 plant structures; EXPRESSED DURING: 13 growth stages; BEST Arabidopsis thaliana protein match is: alpha/beta-Hydrolases superfamily protein (TAIR:AT1G73480.1)	-	-	-
				Bra016558	A08	18285258-18290495	42024	downstream		BnaA08g22660D	A08	16396642 - 16399157	35758	downstream	AT1G18340.1	basal transcription factor complex subunit-related	0.66	0.72	basal transcription factor complex subunit-related; FUNCTIONS IN: general RNA polymerase II transcription factor activity; INVOLVED IN: DNA repair, regulation of transcription, DNA-dependent; LOCATED IN: core TFIIH complex; EXPRESSED IN: 17 plant structures; EXPRESSED DURING: 9 growth stages; CONTAINS InterPro DOMAIN/s: Transcription factor Tfb4 (InterPro:IPR004600)	-	-	-
				Bra016559	A08	18291062-18292567	47828	downstream		BnaA08g22670D	A08	16399467 - 16401621	38583	downstream	AT1G18335.1	Acyl-CoA N-acyltransferases (NAT) superfamily protein	0.84	84%	Acyl-CoA N-acyltransferases (NAT) superfamily protein; FUNCTIONS IN: N-acetyltransferase activity; INVOLVED IN: metabolic process; LOCATED IN: cellular_component unknown; CONTAINS InterPro DOMAIN/s: GCN5-related N-acetyltransferase, C-terminal (InterPro:IPR022610), GCN5-related N-acetyltransferase (InterPro:IPR000182), Acyl-CoA N-acyltransferase (InterPro:IPR016181)	-	-	-
				Bra016560	A08	18293555-18294467	50321	downstream		BnaA08g22680D	A08	16401966 - 16403007	41082	downstream	AT3G10110.1	MEE67 | Mitochondrial import inner membrane translocase subunit Tim17/Tim22/Tim23 family protein	0.75	0.75	maternal effect embryo arrest 67 (MEE67); FUNCTIONS IN: protein transporter activity, P-P-bond-hydrolysis-driven protein transmembrane transporter activity; INVOLVED IN: protein transport, embryo development ending in seed dormancy; LOCATED IN: mitochondrial inner membrane, chloroplast, mitochondrial inner membrane presequence translocase complex; CONTAINS InterPro DOMAIN/s: Mitochondrial inner m…	-	-	-
				Bra016561	A08	18295373-18296291	52139	downstream		BnaA08g22690D	A08	16403573 - 16404911	42689	downstream	AT1G18300.1	atnudt4, NUDT4 | nudix hydrolase homolog 4	0.84	84%	nudix hydrolase homolog 4 (NUDT4); FUNCTIONS IN: hydrolase activity; LOCATED IN: cytosol; EXPRESSED IN: stem, root, leaf; CONTAINS InterPro DOMAIN/s: NUDIX hydrolase domain-like (InterPro:IPR015797), NUDIX hydrolase, conserved site (InterPro:IPR020084), NUDIX hydrolase domain (InterPro:IPR000086); BEST Arabidopsis thaliana protein match is: nudix hydrolase homolog 21 (TAIR:AT1G73540.1)	-	-	-
				Bra016562	A08	18299011-18299508	55777	downstream		BnaA08g22700D	A08	16406935 - 16407432	46051	downstream	AT1G18290.1	unknown protein	0.64	0.64	unknown protein; FUNCTIONS IN: molecular_function unknown; INVOLVED IN: N-terminal protein myristoylation; LOCATED IN: chloroplast; EXPRESSED IN: root	-	-	-
				Bra016563	A08	18304870-18306098	61636	downstream		BnaA08g22710D	A08	16412064 - 16413256	51180	downstream	AT1G18280.1	Bifunctional inhibitor/lipid-transfer protein/seed storage 2S albumin superfamily protein	0.55	0.56	Bifunctional inhibitor/lipid-transfer protein/seed storage 2S albumin superfamily protein; CONTAINS InterPro DOMAIN/s: Bifunctional inhibitor/plant lipid transfer protein/seed storage (InterPro:IPR016140), Plant lipid transfer protein/seed storage/trypsin-alpha amylase inhibitor (InterPro:IPR003612); BEST Arabidopsis thaliana protein match is: Bifunctional inhibitor/lipid-transfer protein/seed st…	-	-	-
				Bra016564	A08	18308338-18308862	65104	downstream		BnaA08g22720D	A08	16419595 - 16420357	58711	downstream	AT1G18210.2	Calcium-binding EF-hand family protein	0.9	90%	Calcium-binding EF-hand family protein; FUNCTIONS IN: calcium ion binding; INVOLVED IN: biological_process unknown; LOCATED IN: plasma membrane, vacuole; EXPRESSED IN: 25 plant structures; EXPRESSED DURING: 13 growth stages; CONTAINS InterPro DOMAIN/s: EF-Hand 1, calcium-binding site (InterPro:IPR018247), EF-HAND 2 (InterPro:IPR018249), EF-hand-like domain (InterPro:IPR011992), Calcium-binding EF…	-	-	-
				Bra016565	A08	18309642-18310771	66408	downstream		BnaA08g22730D	A08	16420951 - 16422080	60067	downstream	AT1G18200.1	AtRABA6b, RABA6b | RAB GTPase homolog A6B	0.86	86%	RAB GTPase homolog A6B (RABA6b); FUNCTIONS IN: GTP binding, GTPase activity; INVOLVED IN: intracellular protein transport, signal transduction, nucleocytoplasmic transport, protein transport, small GTPase mediated signal transduction; LOCATED IN: intracellular; CONTAINS InterPro DOMAIN/s: Ran GTPase (InterPro:IPR002041), Ras (InterPro:IPR013753), Ras small GTPase, Ras type (InterPro:IPR003577), R…	-	-	-
				Bra016566	A08	18311480-18315279	68246	downstream		BnaA08g22740D	A08	16422718 - 16425946	61834	downstream	AT1G18190.1	GC2 | golgin candidate 2	0.58	0.56	This gene is predicted to encode a protein that functions as a Golgi apparatus structural component known as a golgin in mammals and yeast. A fluorescently-tagged version of GC2 co-localizes with Golgi markers, and this localization appears to be replicated using the C-terminal (508–668 aa) portion of the protein.	-	-	-
				Bra016566	A08	18311480-18315279	68246	downstream		BnaA08g22750D	A08	16426295 - 16426588	65411	downstream	AT2G32765.1	SUM5, SUMO5, ATSUMO5 | small ubiquitinrelated modifier 5	0.5	0.46	Encodes a small ubiquitin-like modifier (SUMO) protein that becomes covalently attached to various intracellular protein targets through an isopeptide bond. SUMOylation typically has a post-translational effect on the behavior of the target protein.	-	-	-
				Bra016567	A08	18317378-18318267	74144	downstream		BnaA08g22760D	A08	16427145 - 16429576	66261	downstream	AT1G18150.3/AT3G14720.1/AT3G18040.1/AT1G73670.1/ATMPK15/AT1G18150.2/AT5G19010.1/AT2G01450.1	ATMPK8 | Protein kinase superfamily protein/MPK9 | MAP kinase 9/MPK16 | mitogen-activated protein kinase 16/ATMPK17	0.61	0.69	Encodes mitogen-activated protein kinase 8 (MPK8). MPK8 connects protein phosphorylation, Ca2+, and ROS in the wound-signaling pathway.	-	-	-
				Bra016568	A08	18322679-18325630	79445	downstream		BnaA08g22770D	A08	16433641 - 16436613	72757	downstream	AT1G18140.1	LAC1, ATLAC1 | laccase 1	0.86	86%	putative laccase, a member of laccase family of genes (with 17 members in Arabidopsis).	-	-	-
				Bra016569	A08	18325899-18328884	82665	downstream		BnaA08g22780D	A08	16436882 - 16439897	75998	downstream	AT1G18090.2	5'-3' exonuclease family protein	0.79	79%	5'-3' exonuclease family protein; FUNCTIONS IN: DNA binding, catalytic activity, nuclease activity; INVOLVED IN: DNA repair; LOCATED IN: cellular_component unknown; EXPRESSED IN: 22 plant structures; EXPRESSED DURING: 14 growth stages; CONTAINS InterPro DOMAIN/s: XPG conserved site (InterPro:IPR019974), XPG N-terminal (InterPro:IPR006085), DNA repair protein (XPGC)/yeast Rad (InterPro:IPR006084),…	-	-	-
				Bra025931/Bra031014/Bra016570	A06/A09/A08	6650656-6651981/34680482-34681899/18329520-18330870	86286	downstream		BnaA08g22790D	A08	16440292 - 16441834	79408	downstream	AT1G18080.1	ATARCA, RACK1A_AT, RACK1A | Transducin/WD40 repeat-like superfamily protein	96%/96%/94%	0.72	Encodes the Arabidopsis thaliana homolog of the tobacco WD-40 repeat ArcA gene. It is a scaffold protein that acts downstream of and is phosphorylated by WNK8 in the glucose responsiveness and flowering pathways . Knockout mutants show insensitivity to gibberellin in GA-induced seed germination.	-	-	-
				Bra016571	A08	18332632-18338145	89398	downstream		BnaA08g22800D	A08	16441888 - 16447283	81004	downstream	AT1G18070.3	Translation elongation factor EF1A/initiation factor IF2gamma family protein	0.85	83%	Translation elongation factor EF1A/initiation factor IF2gamma family protein; FUNCTIONS IN: translation factor activity, nucleic acid binding, GTP binding, GTPase activity; EXPRESSED IN: 25 plant structures; EXPRESSED DURING: 15 growth stages; CONTAINS InterPro DOMAIN/s: Translation elongation factor EFTu/EF1A, C-terminal (InterPro:IPR004160), Translation elongation factor EFTu/EF1A, domain 2 (In…	-	-	-
				Bra016571	A08	18332632-18338145	89398	downstream		BnaA08g22810D	A08	16448082 - 16449455	87198	downstream	AT1G18060.1	unknown protein	0.71	87%	unknown protein; INVOLVED IN: biological_process unknown; LOCATED IN: chloroplast; EXPRESSED IN: 22 plant structures; EXPRESSED DURING: 13 growth stages	-	-	-
				Bra016572/Bra031013	A08/A09	18339830-18342024/34688210-34690263	96596	downstream		BnaA08g22820D	A08	16450341 - 16452816	89457	downstream	AT1G18040.1/AT1G73690.1	CDKD1;3, AT;CDCKD;3, CAK2AT | cyclin-dependent kinase	90%/90%	90%	cyclin-dependent kinase D1;3 (CDKD1;3); CONTAINS InterPro DOMAIN/s: Protein kinase, ATP binding site (InterPro:IPR017441), Protein kinase, catalytic domain (InterPro:IPR000719), Serine/threonine-protein kinase domain (InterPro:IPR002290), Serine/threonine-protein kinase-like domain (InterPro:IPR017442), Protein kinase-like domain (InterPro:IPR011009), Serine/threonine-protein kinase, active site …	-	-	-
				Bra016573	A08	18343201-18346462	99967	downstream		BnaA08g22830D	A08	16453802 - 16457257	92918	downstream	AT1G17980.1	PAPS1 | poly(A) polymerase 1	0.76	79%	Encodes a poly(A) polymerase. Located in the nucleus. It limits founder-cell recruitment to organ primordia and suppresses the salicylic acid-independent immune response downstream of EDS1/PAD4.	-	-	-
				Bra016574	A08	18347075-18348905	103841	downstream		BnaA08g22840D	A08	16457491 - 16459568	96607	downstream	AT1G17970.1	RING/U-box superfamily protein	0.7	0.7	RING/U-box superfamily protein; FUNCTIONS IN: zinc ion binding; EXPRESSED IN: 20 plant structures; EXPRESSED DURING: 13 growth stages; CONTAINS InterPro DOMAIN/s: Zinc finger, RING-type (InterPro:IPR001841), Zinc finger, C3HC4 RING-type (InterPro:IPR018957); BEST Arabidopsis thaliana protein match is: RING/U-box superfamily protein (TAIR:AT1G73760.1)	-	-	-
				Bra016575	A08	18352495-18353736	109261	downstream		BnaA08g22850D	A08	16469671 - 16470895	108787	downstream	AT1G17950.1	ATMYB52, BW52, MYB52 | myb domain protein 52	0.83	82%	putative transcription factor: R2R3-MYB transcription family	-	-	-
				Bra016576	A08	18357048-18357308	113814	downstream		BnaA08g22860D	A08	16473505 - 16474574	112621	downstream	AT5G07520.1	GRP18, ATGRP18, ATGRP-8 | glycine-rich protein 18	0.45	0.3	encodes a glycine-rich protein that is expressed only in flowers during a specific developmental stage (flower stage 12).	-	-	-
				Bra016578	A08	18364519-18367156	121285	downstream		BnaA08g22870D	A08	16481578 - 16484218	120694	downstream	AT1G17920.1	HDG12 | homeodomain GLABROUS 12	0.81	82%	Encodes a homeobox-leucine zipper family protein belonging to the HD-ZIP IV family. Together with HDG11, it is involved in trichome branching.	-	-	-
				Bra016579	A08	18368374-18370918	125140	downstream		BnaA08g22880D	A08	16484271 - 16488227	123387	downstream	AT1G73230.1 /AT1G17890.1/AT1G73250.1/AT1G17880.1	Nascent polypeptide-associated complex NAC/GER2 | NAD(P)-binding Rossmann-fold superfamily protein/ATFX/BTF3	0.75	0.74	Nascent polypeptide-associated complex NAC; FUNCTIONS IN: molecular_function unknown; INVOLVED IN: response to salt stress; LOCATED IN: cellular_component unknown; EXPRESSED IN: 24 plant structures; EXPRESSED DURING: 15 growth stages; CONTAINS InterPro DOMAIN/s: Nascent polypeptide-associated complex NAC (InterPro:IPR002715); BEST Arabidopsis thaliana protein match is: basic transcription factor …	-	-	-
				Bra016580	A08	18371225-18371812	127991	downstream		BnaA08g22890D	A08	16488279 - 16488866	127395	downstream	AT1G17860.1	Kunitz family trypsin and protease inhibitor protein	0.72	0.74	Kunitz family trypsin and protease inhibitor protein; FUNCTIONS IN: endopeptidase inhibitor activity; INVOLVED IN: biological_process unknown; LOCATED IN: apoplast, cell wall; EXPRESSED IN: 17 plant structures; EXPRESSED DURING: 13 growth stages; CONTAINS InterPro DOMAIN/s: Proteinase inhibitor I3, Kunitz legume (InterPro:IPR002160), Kunitz inhibitor ST1-like (InterPro:IPR011065); BEST Arabidopsi…	-	-	-
				Bra016582	A08	18376319-18379255	133085	downstream		BnaA08g22900D	A08	16490144 - 16493176	129260	downstream	AT2G21950.1/AT4G39590.1	SKIP6 | SKP1 interacting partner 6/Galactose oxidase/kelch repeat superfamily	0.31	0.34	Encodes an SKP1 interacting partner (SKIP6).	-	-	-
				Bra016583	A08	18379715-18380374	136481	downstream		BnaA08g22910D	A08	16493635 - 16494294	132751	downstream	AT1G17840.1	WBC11, ABCG11, DSO, COF1, ATWBC11 | white-brown complex homolog protein 11	0.5	0.61	Encodes a plasma membrane-localized ATP-binding cassette transporter, that is required for cutin transport to the extracellular matrix. The mRNA is cell-to-cell mobile.	-	-	-
				Bra016584/Bra025944	A08/A06	18380725-18383633/6564448-6567561	137491	downstream		BnaA08g22920D	A08	16494469 - 16497818	133585	downstream	AT1G17840.1	WBC11, ABCG11, DSO, COF1, ATWBC11 | white-brown complex homolog protein 11	90%/89%	87%	Encodes a plasma membrane-localized ATP-binding cassette transporter, that is required for cutin transport to the extracellular matrix. The mRNA is cell-to-cell mobile.	-	-	-
				Bra016585	A08	18386760 - 18388668	143526	downstream		BnaA08g22930D	A08	16500405 - 16502852	139521	downstream	AT1G17830.1	Protein of unknown function (DUF789)	0.68	0.69	Protein of unknown function (DUF789); CONTAINS InterPro DOMAIN/s: Protein of unknown function DUF789 (InterPro:IPR008507); BEST Arabidopsis thaliana protein match is: Protein of unknown function (DUF789) (TAIR:AT1G73210.1)	-	-	-
				Bra016586	A08	18392587 - 18394167	149353	downstream		BnaA08g22940D	A08	16505326 - 16507302	144442	downstream	AT1G17790.1	DNA-binding bromodomain-containing protein	0.62	0.61	DNA-binding bromodomain-containing protein; FUNCTIONS IN: DNA binding; INVOLVED IN: biological_process unknown; LOCATED IN: chloroplast; EXPRESSED IN: 18 plant structures; EXPRESSED DURING: 9 growth stages; CONTAINS InterPro DOMAIN/s: Bromodomain (InterPro:IPR001487); BEST Arabidopsis thaliana protein match is: global transcription factor group E3 (TAIR:AT1G73150.1)	-	-	-
				Bra016587	A08	18394570 - 18395595	151336	downstream		BnaA08g22950D	A08	16507371 - 16508993	146487	downstream	AT1G17780.2	unknown protein	0.55	0.55	unknown protein; BEST Arabidopsis thaliana protein match is: unknown protein (TAIR:AT2G16575.1)	-	-	-
				Bra016588	A08	18397607 - 18402860	154373	downstream		BnaA08g22960D	A08	16510506 - 16515820	149622	downstream	AT1G17760.1	CSTF77, ATCSTF77 | Tetratricopeptide repeat (TPR)-like superfamily protein	0.84	83%	Encodes a homolog of the mammalian protein CstF77, a polyadenylation factor subunit. RNA 3′-end–processing factor of antisense FLC transcript. Mediates silencing of the floral repressor gene FLC.	-	-	-
				Bra016589	A08	18403597 - 18407683	160363	downstream		BnaA08g22970D	A08	16516197 - 16520512	155313	downstream	AT1G17745.1	PGDH | D-3-phosphoglycerate dehydrogenase	0.83	83%	encodes a 3-Phosphoglycerate dehydrogenase The mRNA is cell-to-cell mobile.	-	-	-
										BnaA08g22980D	A08	16523184 - 16524087	162300	downstream	AT1G17720.2	ATB BETA | Protein phosphatase 2A, regulatory subunit	NA	91%	type 2A protein serine/threonine phosphatase 55 kDa B	-	-	-
				Bra016590	A08	18410745 - 18413972	167511	downstream		BnaA08g22990D	A08	16524160 - 16527877	163276	downstream	AT1G17720.2	ATB BETA | Protein phosphatase 2A, regulatory subunit	0.91	91%	type 2A protein serine/threonine phosphatase 55 kDa B	-	-	-
				Bra016591	A08	18416499 - 18417641	173265	downstream		BnaA08g23000D	A08	16529841 - 16531142	168957	downstream	AT1G17710.1	Pyridoxal phosphate phosphatase-related protein	0.85	86%	Encodes a phosphoethanolamine/phosphocholine phosphatase. It is likely to be involved in the liberation of inorganic phosphate from intracellular sources. Expression is upregulated in the shoot of cax1/cax3 mutant.	-	-	-
				Bra016592	A08	18418822 - 18424081	175588	downstream		BnaA08g23010D	A08	16532233 - 16537728	171349	downstream	AT1G17690.1	NOF1	0.71	0.71	FUNCTIONS IN: molecular_function unknown; INVOLVED IN: biological_process unknown; LOCATED IN: nucleus; EXPRESSED IN: 24 plant structures; EXPRESSED DURING: 13 growth stages; CONTAINS InterPro DOMAIN/s: Digestive organ expansion factor, predicted (InterPro:IPR010678)	-	-	-
				Bra016593	A08	18427242 - 18428027	184008	downstream		BnaA08g23020D	A08	16541255 - 16542040	180371	downstream	AT1G17620.1	Late embryogenesis abundant (LEA) hydroxyproline-rich glycoprotein family	0.54	0.57	Late embryogenesis abundant (LEA) hydroxyproline-rich glycoprotein family; FUNCTIONS IN: molecular_function unknown; INVOLVED IN: biological_process unknown; LOCATED IN: plasma membrane; EXPRESSED IN: 23 plant structures; EXPRESSED DURING: 13 growth stages; CONTAINS InterPro DOMAIN/s: Late embryogenesis abundant protein, group 2 (InterPro:IPR004864); BEST Arabidopsis thaliana protein match is: un…	-	-	-
				Bra016594	A08	18429555 - 18433584	186321	downstream		BnaA08g23030D	A08	16543547 - 16547586	182663	downstream	AT5G48770.1	Disease resistance protein (TIR-NBS-LRR class) family	0.45	0.45	Disease resistance protein (TIR-NBS-LRR class) family; FUNCTIONS IN: transmembrane receptor activity, ATP binding; INVOLVED IN: signal transduction, apoptosis, defense response, innate immune response; LOCATED IN: intrinsic to membrane; CONTAINS InterPro DOMAIN/s: NB-ARC (InterPro:IPR002182), Leucine-rich repeat (InterPro:IPR001611), Toll-Interleukin receptor (InterPro:IPR000157), Disease resista…	-	-	-
				Bra016595	A08	18435100 - 18436404	191866	downstream		BnaA08g23040D	A08	16548791 - 16550837	187907	downstream	AT1G17550.1/AT1G17545.1	HAB2 | homology to ABI2/Protein phosphatase 2C family protein	0.78	0.67	Protein Phosphatase 2C	-	-	-
				Bra016596	A08	18437450 - 18440805	194216	downstream		BnaA08g23050D	A08	16551584 - 16555089	190700	downstream	AT1G17540.1	Protein kinase protein with adenine nucleotide alpha hydrolases-like domain	0.68	75%	Protein kinase protein with adenine nucleotide alpha hydrolases-like domain; FUNCTIONS IN: kinase activity; INVOLVED IN: protein amino acid phosphorylation, response to stress; LOCATED IN: cellular_component unknown; EXPRESSED IN: 9 plant structures; EXPRESSED DURING: L mature pollen stage, M germinated pollen stage, 4 anthesis, C globular stage, petal differentiation and expansion stage; CONTAIN…	-	-	-
				Bra016597	A08	18441643 - 18442200	198409	downstream		BnaA08g23060D	A08	16555888 - 16556445	195004	downstream	AT1G17530.1	ATTIM23-1, TIM23-1 | translocase of inner mitochondrial membrane 23	0.5	0.5	Encodes a translocase of inner mitochondrial membrane.	-	-	-
				Bra016598	A08	18442985 - 18445166	199751	downstream		BnaA08g23070D	A08	16556775 - 16559240	195891	downstream	AT1G17520.1	Homeodomain-like/winged-helix DNA-binding family	0.64	0.64	Homeodomain-like/winged-helix DNA-binding family protein; FUNCTIONS IN: DNA binding, sequence-specific DNA binding transcription factor activity; INVOLVED IN: in 6 processes; LOCATED IN: nucleus, nucleosome; EXPRESSED IN: 11 plant structures; EXPRESSED DURING: 7 growth stages; CONTAINS InterPro DOMAIN/s: Winged helix-turn-helix transcription repressor DNA-binding (InterPro:IPR011991), SANT, DNA-b…	-	-	-
				Bra025972/Bra016599	A06/A08	6406638 - 6409137/18445962 - 18448622	202728	downstream		BnaA08g23080D	A08	16559754 - 16560835	198870	downstream	AT1G17470.2/AT1G72660.1	ATDRG1, ATDRG, DRG1 | developmentally regulated G-protein 1/P-loop containing nucleoside triphosphate hydrolases superfamily protein	90%/86%	87%	Encodes a member of the DRG (developmentally regulated G-protein) family expressed throughout the plant, with highest expression in actively growing tissues. Has GTPase activity.	-	-	-
				Bra025972/Bra016599	A06/A08	6406638 - 6409137/18445962 - 18448622	202728	downstream		BnaA08g23090D	A08	16560948 - 16562443	200064	downstream	AT1G17470.2/AT1G72660.1	ATDRG1, ATDRG, DRG1 | developmentally regulated G-protein 1/P-loop containing nucleoside triphosphate hydrolases superfamily protein	90%/86%	91%	Encodes a member of the DRG (developmentally regulated G-protein) family expressed throughout the plant, with highest expression in actively growing tissues. Has GTPase activity.	-	-	-
				Bra016600	A08	18452482 - 18452931	209248	downstream		BnaA08g23100D	A08	16563778 - 16567323	202894	downstream	AT5G02210.1	GCK domain-containing protein	0.28	0.27	GCK domain-containing protein; FUNCTIONS IN: molecular_function unknown; INVOLVED IN: N-terminal protein myristoylation; LOCATED IN: cellular_component unknown; CONTAINS InterPro DOMAIN/s: GCK (InterPro:IPR012891); BEST Arabidopsis thaliana protein match is: unknown protein (TAIR:AT1G23201.1)	-	-	-
				Bra016601	A08	18459355 - 18460947	216121	downstream		BnaA08g23110D	A08	16573890 - 16575589	213006	downstream	AT1G17430.1	alpha/beta-Hydrolases superfamily protein	0.86	0.86	alpha/beta-Hydrolases superfamily protein; FUNCTIONS IN: hydrolase activity; INVOLVED IN: biological_process unknown; LOCATED IN: endomembrane system; EXPRESSED IN: 24 plant structures; EXPRESSED DURING: 13 growth stages; CONTAINS InterPro DOMAIN/s: Alpha/beta hydrolase fold-1 (InterPro:IPR000073); BEST Arabidopsis thaliana protein match is: alpha/beta-Hydrolases superfamily protein (TAIR:AT1G726…	-	-	-
				Bra016602	A08	18462109 - 18466154	218875	downstream		BnaA08g23120D	A08	16576625 - 16580790	215741	downstream	AT1G17420.1	LOX3 | lipoxygenase 3	0.87	0.86	LOX3 encode a Lipoxygenase. Lipoxygenases (LOXs) catalyze the oxygenation of fatty acids (FAs).	-	-	-
				Bra016603	A08	18474268 - 18480636	231034	downstream		BnaA08g23130D	A08	16587282 - 16588449	226398	downstream	AT1G17410.1	Nucleoside diphosphate kinase family protein	0.8	0.84	Nucleoside diphosphate kinase family protein; FUNCTIONS IN: nucleoside diphosphate kinase activity, ATP binding; INVOLVED IN: in 6 processes; LOCATED IN: endomembrane system; EXPRESSED IN: 23 plant structures; EXPRESSED DURING: 15 growth stages; CONTAINS InterPro DOMAIN/s: Nucleoside diphosphate kinase, core (InterPro:IPR001564); BEST Arabidopsis thaliana protein match is: nucleoside diphosphate …	-	-	-
				Bra016603	A08	18474268 - 18480636	231034	downstream		BnaA08g23140D	A08	16588557 - 16594096	227673	downstream	AT1G17400.1	unknown protein	0.63	0.63	unknown protein; BEST Arabidopsis thaliana protein match is: unknown protein (TAIR:AT1G72490.1)	-	-	-
UQnapus4615	A10	6601391	A10; 11058507 - 11058556	Bra002205	A10	10975502 - 10977626	-80881	upstream	A10; 12381950 - 12381999	BnaA10g16010D	A10	12301496 - 12303961	-77989	upstream	AT5G19050	alpha/beta-Hydrolases superfamily protein	0.8	0.8	INVOLVED IN: biological_process unknown; LOCATED IN: chloroplast; EXPRESSED IN: 18 plant structures; EXPRESSED DURING: 8 growth stages; CONTAINS InterPro DOMAIN/s: Protein of unknown function DUF1749 (InterPro:IPR013744	-	-	-		https://www.arabidopsis.org/servlets/TairObject?type=locus&name=AT5G19050	http://www.genoscope.cns.fr/brassicanapus/cgi-bin/geneView?src=colza;name=BnaA10g16010D	http://brassicadb.org/brad/searchGene.php?ginput=Bra002205	http://brassicadb.org/brad/proteinseq.php?ginput=Bra002205
				Bra002204	A10	10990103 - 10991107	-67400	upstream		BnaA10g16020D	A10	12315072 - 12316076	-65874	upstream	AT5G19040	ARABIDOPSIS THALIANA ISOPENTENYLTRANSFERASE 5, ATIPT5, IPT5, ISOPENTENYLTRANSFERASE 5	0.83	0.83	Encodes cytokinin synthase.	-	-	-		https://www.arabidopsis.org/servlets/TairObject?type=locus&name=AT5G19040	http://www.genoscope.cns.fr/brassicanapus/cgi-bin/geneView?src=colza;name=BnaA10g16020D	http://brassicadb.org/brad/searchGene.php?ginput=Bra002204	http://brassicadb.org/brad/proteinseq.php?ginput=Bra002204
				Bra002203	A10	10995292 - 10995930	-62577	upstream		BnaA10g16040D	A10	12322711 - 12324638	-57312	upstream	AT5G19020	MEF18, MITOCHONDRIAL EDITING FACTOR 18	?			-	-	-		https://www.arabidopsis.org/servlets/TairObject?type=locus&name=AT5G19020	http://www.genoscope.cns.fr/brassicanapus/cgi-bin/geneView?src=colza;name=BnaA10g16040D	http://brassicadb.org/brad/searchGene.php?ginput=Bra002203	http://brassicadb.org/brad/proteinseq.php?ginput=Bra002203
				Bra002202	A10	10997691 - 10999412	-59095	upstream		BnaA10g16040D	A10	12322711 - 12324638	-57312	upstream	AT5G19020	MEF18, MITOCHONDRIAL EDITING FACTOR 18	0.86	0.54	Encodes a pentatricopeptide repeat protein (PPR) protein involved in mitochondrial mRNA editing	-	-	-		https://www.arabidopsis.org/servlets/TairObject?type=locus&name=AT5G19020	http://www.genoscope.cns.fr/brassicanapus/cgi-bin/geneView?src=colza;name=BnaA10g16040D	http://brassicadb.org/brad/searchGene.php?ginput=Bra002202	http://brassicadb.org/brad/proteinseq.php?ginput=Bra002202
				Bra002201	A10	11001328 - 11003790	-54717	upstream		BnaA10g16050D	A10	12327758 - 12330928	-51022	upstream	AT5G19010	MITOGEN-ACTIVATED PROTEIN KINASE 16, MPK16	0.8	0.91	member of MAP Kinase	-	-	-		https://www.arabidopsis.org/servlets/TairObject?type=locus&name=AT5G19010	http://www.genoscope.cns.fr/brassicanapus/cgi-bin/geneView?src=colza;name=BnaA10g16050D	http://brassicadb.org/brad/searchGene.php?ginput=Bra002201	http://brassicadb.org/brad/proteinseq.php?ginput=Bra002201
				Bra002200	A10	11004165 - 11006512	-51995	upstream		BnaA10g16060D	A10	12330981 - 12333608	-48342	upstream	AT5G19000	ATBPM1, BPM1, BTB-POZ AND MATH DOMAIN 1	0.86	0.8	Encodes a member of the MATH-BTB domain proteins (BPMs) that directly interact with and target for proteasomal degradation the class I homeobox-leucine zipper (HD-ZIP) transcription factor ATHB6. Known members include AT5G19000 (BPM1), AT3G06190 (BPM2), AT2G39760 (BPM3), AT3G03740 (BPM4), AT5G21010 (BPM5) and AT3G43700 (BPM6).	-	-	-		https://www.arabidopsis.org/servlets/TairObject?type=locus&name=AT5G19000	http://www.genoscope.cns.fr/brassicanapus/cgi-bin/geneView?src=colza;name=BnaA10g16060D	http://brassicadb.org/brad/searchGene.php?ginput=Bra002200	http://brassicadb.org/brad/proteinseq.php?ginput=Bra002200
				Bra002199	A10	11011340 - 11014188	-44319	upstream		BnaA10g16070D	A10	12336835 - 12339708	-42242	upstream	AT5G18980	ARM repeat superfamily protein	0.81	0.79	binding; INVOLVED IN: biological_process unknown; LOCATED IN: cellular_component unknown; CONTAINS InterPro DOMAIN/s: Armadillo-like helical (InterPro:IPR011989), Armadillo (InterPro:IPR000225), Armadillo-type fold (InterPro:IPR016024); BEST Arabidopsis thaliana protein match is: ARM repeat superfamily protein (TAIR:AT3G06210.1)	-	-	-		https://www.arabidopsis.org/servlets/TairObject?type=locus&name=AT5G18980	http://www.genoscope.cns.fr/brassicanapus/cgi-bin/geneView?src=colza;name=BnaA10g16070D	http://brassicadb.org/brad/searchGene.php?ginput=Bra002199	http://brassicadb.org/brad/proteinseq.php?ginput=Bra002199
				Bra002198	A10	11014547 - 11015304	-43203	upstream		BnaA10g16080D	A10	12339933 - 12341004	-40946	upstream	AT5G18970	AWPM-19-like family protein	0.75	0.76	molecular_function unknown; INVOLVED IN: biological_process unknown; LOCATED IN: endomembrane system, membrane; EXPRESSED IN: 22 plant structures; EXPRESSED DURING: 13 growth stages; CONTAINS InterPro DOMAIN/s: AWPM-19-like (InterPro:IPR008390); BEST Arabidopsis thaliana protein match is: AWPM-19-like family protein (TAIR:AT5G46530.1)	-	-	-		https://www.arabidopsis.org/servlets/TairObject?type=locus&name=AT5G18970	http://www.genoscope.cns.fr/brassicanapus/cgi-bin/geneView?src=colza;name=BnaA10g16080D	http://brassicadb.org/brad/searchGene.php?ginput=Bra002198	http://brassicadb.org/brad/proteinseq.php?ginput=Bra002198
				Bra002197	A10	11015623 - 11016394	-42113	upstream							AT5G18960	FRS12; FRS12 (FAR1-related sequence 12); zinc ion binding	0.84		FAR1-related sequence 12 (FRS12); FUNCTIONS IN: zinc ion binding; INVOLVED IN: response to red or far red light; LOCATED IN: cellular_component unknown; EXPRESSED IN: 22 plant structures; EXPRESSED DURING: 13 growth stages; CONTAINS InterPro DOMAIN/s: MULE transposase, conserved domain (InterPro:IPR018289), Transcription factor, FAR1-related (InterPro:IPR004330), Zinc finger, PMZ-type (InterPro:I…	-	-	-		https://www.arabidopsis.org/servlets/TairObject?type=locus&name=AT5G18960		http://brassicadb.org/brad/searchGene.php?ginput=Bra002197	http://brassicadb.org/brad/proteinseq.php?ginput=Bra002197
				Bra002196	A10	11018880 - 11020388	-38119	upstream		BnaA10g16090D	A10	12342409 - 12344048	-37902	upstream	AT5G18950	Tetratricopeptide repeat (TPR)-like superfamily protein	0.66	0.68	CONTAINS InterPro DOMAIN/s: Pentatricopeptide repeat (InterPro:IPR002885); BEST Arabidopsis thaliana protein match is: rna processing factor 2 (TAIR:AT1G62670.1)	-	-	-		https://www.arabidopsis.org/servlets/TairObject?type=locus&name=AT5G18950	http://www.genoscope.cns.fr/brassicanapus/cgi-bin/geneView?src=colza;name=BnaA10g16090D	http://brassicadb.org/brad/searchGene.php?ginput=Bra002196	http://brassicadb.org/brad/proteinseq.php?ginput=Bra002196
				Bra002195	A10	11020808 - 11022805	-35702	upstream		BnaA10g16100D	A10	12344105 - 12346566	-35384	upstream	AT5G18940	Mo25 family protein	0.87	0.87	biological_process unknown; LOCATED IN: cellular_component unknown; EXPRESSED IN: 24 plant structures; EXPRESSED DURING: 15 growth stages; CONTAINS InterPro DOMAIN/s: Mo25-like (InterPro:IPR013878), Armadillo-type fold (InterPro:IPR016024); BEST Arabidopsis thaliana protein match is: Mo25 family protein (TAIR:AT5G47540.1)	-	-	-		https://www.arabidopsis.org/servlets/TairObject?type=locus&name=AT5G18940	http://www.genoscope.cns.fr/brassicanapus/cgi-bin/geneView?src=colza;name=BnaA10g16100D	http://brassicadb.org/brad/searchGene.php?ginput=Bra002195	http://brassicadb.org/brad/proteinseq.php?ginput=Bra002195
				Bra002194	A10	11037317 - 11038357	-20150	upstream		BnaA10g16110D	A10	12360977 - 12362017	-19933	upstream	AT5G18930	BUD2, BUSHY AND DWARF 2, SAMDC4; Adenosylmethionine decarboxylase family protein	0.89	0.9	BUSHY AND DWARF 2 (BUD2); FUNCTIONS IN: adenosylmethionine decarboxylase activity; INVOLVED IN: spermidine biosynthetic process, spermine biosynthetic process, polyamine biosynthetic process; LOCATED IN: cellular_component unknown; EXPRESSED IN: 11 plant structures; EXPRESSED DURING: 6 growth stages; CONTAINS InterPro DOMAIN/s: S-adenosylmethionine decarboxylase, core (InterPro:IPR016067), S-aden…	-	-	-		https://www.arabidopsis.org/servlets/TairObject?type=locus&name=AT5G18930	http://www.genoscope.cns.fr/brassicanapus/cgi-bin/geneView?src=colza;name=BnaA10g16110D	http://brassicadb.org/brad/searchGene.php?ginput=Bra002194	http://brassicadb.org/brad/proteinseq.php?ginput=Bra002194
				Bra002193	A10	11040486 - 11040739	-17768	upstream		BnaA10g16120D	A10	12364143 - 12364396	-17554	upstream	AT5G18920	Cox19-like CHCH family protein	0.86	0.88	CONTAINS InterPro DOMAIN/s: CHCH (InterPro:IPR010625)	-	-	-		https://www.arabidopsis.org/servlets/TairObject?type=locus&name=AT5G18920	http://www.genoscope.cns.fr/brassicanapus/cgi-bin/geneView?src=colza;name=BnaA10g16120D	http://brassicadb.org/brad/searchGene.php?ginput=Bra002193	http://brassicadb.org/brad/proteinseq.php?ginput=Bra002193
				Bra002192	A10	11042127 - 11043707	-14800	upstream		BnaA10g16140D	A10	12366726 - 12368306	-13644	upstream	AT5G18900	2-oxoglutarate (2OG) and Fe(II)-dependent oxygenase superfamily protein	0.9	0.92	oxidoreductase activity, acting on paired donors, with incorporation or reduction of molecular oxygen, 2-oxoglutarate as one donor, and incorporation of one atom each of oxygen into both donors, oxidoreductase activity, oxidoreductase activity, acting on paired donors, with incorporation or reduction of molecular oxygen, L-ascorbic acid binding, iron ion binding; INVOLVED IN: oxidation reduction,…	-	-	-		https://www.arabidopsis.org/servlets/TairObject?type=locus&name=AT5G18900	http://www.genoscope.cns.fr/brassicanapus/cgi-bin/geneView?src=colza;name=BnaA10g16140D	http://brassicadb.org/brad/searchGene.php?ginput=Bra002192	http://brassicadb.org/brad/proteinseq.php?ginput=Bra002192
				Bra002191	A10	11044029 - 11050295	-8212	upstream		BnaA10g16150D	A10	12368400 - 12374085	-7865	upstream	AT5G18860	NSH3, NUCLEOSIDE HYDROLASE 3; inosine-uridine preferring nucleoside hydrolase family protein	0.8	0.8	Encodes a purine nucleoside hydrolase active in the apoplast. It might play a role in salvaging extracellular ATP. NSH3 transcript levels rise in response to jasmonic acid and wounding.	-	-	-		https://www.arabidopsis.org/servlets/TairObject?type=locus&name=AT5G18860	http://www.genoscope.cns.fr/brassicanapus/cgi-bin/geneView?src=colza;name=BnaA10g16150D	http://brassicadb.org/brad/searchGene.php?ginput=Bra002191	http://brassicadb.org/brad/proteinseq.php?ginput=Bra002191
				Bra002190	A10	11055892 - 11056077	-2430	upstream		BnaA10g16160D	A10	12379442 - 12379627	-2323	upstream	AT5G18850	unknown protein	0.79	0.77	molecular_function unknown; INVOLVED IN: biological_process unknown; LOCATED IN: endomembrane system; EXPRESSED IN: 23 plant structures; EXPRESSED DURING: 13 growth stages	-	-	-		https://www.arabidopsis.org/servlets/TairObject?type=locus&name=AT5G18850	http://www.genoscope.cns.fr/brassicanapus/cgi-bin/geneView?src=colza;name=BnaA10g16160D	http://brassicadb.org/brad/searchGene.php?ginput=Bra002190	http://brassicadb.org/brad/proteinseq.php?ginput=Bra002190
				Bra002189	A10	11056975 - 11060035	Gene	Gene		BnaA10g16170D	A10	12380273 - 12383617	Gene	Gene	AT5G18840	Major facilitator superfamily protein	0.91	0.91	carbohydrate transmembrane transporter activity, sugar:hydrogen symporter activity; INVOLVED IN: transport, transmembrane transport; LOCATED IN: integral to membrane, membrane; EXPRESSED IN: 17 plant structures; EXPRESSED DURING: 7 growth stages; CONTAINS InterPro DOMAIN/s: Major facilitator superfamily (InterPro:IPR020846), General substrate transporter (InterPro:IPR005828), Sugar/inositol trans…	-	-	-		https://www.arabidopsis.org/servlets/TairObject?type=locus&name=AT5G18840	http://www.genoscope.cns.fr/brassicanapus/cgi-bin/geneView?src=colza;name=BnaA10g16170D	http://brassicadb.org/brad/searchGene.php?ginput=Bra002189	http://brassicadb.org/brad/proteinseq.php?ginput=Bra002189
				Bra002188	A10	11062192 - 11066204	3636	downstream		BnaA10g16180D	A10	12387361 - 12391804	5362	downstream	AT5G18830	ATSPL7, SPL7, squamosa promoter binding protein-like 7	0.76	0.81	Encodes a member of the Squamosa Binding Protein family of transcriptional regulators. SPL7 is expressed highly in roots and appears to play a role in copper homeostasis. Mutants are hypersensitive to copper deficient conditions and display a retarded growth phenotype. SPL7 binds to the promoter of the copper responsive miRNAs miR398b and miR389c.	-	-	-		https://www.arabidopsis.org/servlets/TairObject?type=locus&name=AT5G18830	http://www.genoscope.cns.fr/brassicanapus/cgi-bin/geneView?src=colza;name=BnaA10g16180D	http://brassicadb.org/brad/searchGene.php?ginput=Bra002188	http://brassicadb.org/brad/proteinseq.php?ginput=Bra002188
				Bra002187	A10	11082443 - 11082808	23887	downstream							AT5G41790	CIP1; CIP1 (COP1-INTERACTIVE PROTEIN 1); protein binding	?		encodes a protein that physically interacts specifically with the putative coiled-coil region of COP1 in vitro. In hypocotyl and cotyledon protoplasts, it is associated to the cytoskeleton, but not in the root. expression is not regulated by light. The mRNA is cell-to-cell mobile	-	-	-		https://www.arabidopsis.org/servlets/TairObject?type=locus&name=AT5G41790		http://brassicadb.org/brad/searchGene.php?ginput=Bra002187	http://brassicadb.org/brad/proteinseq.php?ginput=Bra002187
				Bra002186	A10	11099753 - 11100564	41197	downstream		BnaA10g16190D	A10	12394752 - 12396082	12753	downstream	AT5G18800	Cox19-like CHCH family protein	0.99	0.99	NADH dehydrogenase (ubiquinone) activity; INVOLVED IN: mitochondrial electron transport, NADH to ubiquinone; LOCATED IN: mitochondrial respiratory chain complex I; EXPRESSED IN: 24 plant structures; EXPRESSED DURING: 14 growth stages; CONTAINS InterPro DOMAIN/s: CHCH (InterPro:IPR010625); BEST Arabidopsis thaliana protein match is: Cox19-like CHCH family protein (TAIR:AT3G06310.3)	-	-	-		https://www.arabidopsis.org/servlets/TairObject?type=locus&name=AT5G18800	http://www.genoscope.cns.fr/brassicanapus/cgi-bin/geneView?src=colza;name=BnaA10g16190D	http://brassicadb.org/brad/searchGene.php?ginput=Bra002186	http://brassicadb.org/brad/proteinseq.php?ginput=Bra002186
				Bra002185	A10	11101205 - 11101381	42649	downstream		BnaA10g16200D	A10	12396217 - 12396860	14218	downstream	AT5G18790	Ribosomal protein L33 family protein	0.98	0.98	structural constituent of ribosome; INVOLVED IN: translation; LOCATED IN: ribosome, intracellular, large ribosomal subunit; CONTAINS InterPro DOMAIN/s: Ribosomal protein L33 (InterPro:IPR001705); BEST Arabidopsis thaliana protein match is: Ribosomal protein L33 family protein (TAIR:AT3G06320.1)	-	-	-		https://www.arabidopsis.org/servlets/TairObject?type=locus&name=AT5G18790	http://www.genoscope.cns.fr/brassicanapus/cgi-bin/geneView?src=colza;name=BnaA10g16200D	http://brassicadb.org/brad/searchGene.php?ginput=Bra002185	http://brassicadb.org/brad/proteinseq.php?ginput=Bra002185
				Bra002184	A10	11102367 - 11103155	43811	downstream		BnaA10g16210D	A10	12397682 - 12400542	15683	downstream	AT5G18750	DNAJ heat shock N-terminal domain-containing protein	0.71	0.58	unfolded protein binding, heat shock protein binding; INVOLVED IN: protein folding; LOCATED IN: cellular_component unknown; EXPRESSED IN: 19 plant structures; EXPRESSED DURING: 8 growth stages; CONTAINS InterPro DOMAIN/s: Molecular chaperone, heat shock protein, Hsp40, DnaJ (InterPro:IPR015609), Heat shock protein DnaJ, N-terminal (InterPro:IPR001623), Heat shock protein DnaJ (InterPro:IPR003095)…	-	-	-		https://www.arabidopsis.org/servlets/TairObject?type=locus&name=AT5G18750	http://www.genoscope.cns.fr/brassicanapus/cgi-bin/geneView?src=colza;name=BnaA10g16210D	http://brassicadb.org/brad/searchGene.php?ginput=Bra002184	http://brassicadb.org/brad/proteinseq.php?ginput=Bra002184
				Bra002183	A10	11107550 - 11109256	48994	downstream							AT5G18730	Unknown Protein	0.68		CONTAINS InterPro DOMAIN/s: Molecular chaperone, heat shock protein, Hsp40, DnaJ (InterPro:IPR015609); BEST Arabidopsis thaliana protein match is: Domain of unknown function (DUF3444) (TAIR:AT5G18740.1)	-	-	-		https://www.arabidopsis.org/servlets/TairObject?type=locus&name=AT5G18730		http://brassicadb.org/brad/searchGene.php?ginput=Bra002183	http://brassicadb.org/brad/proteinseq.php?ginput=Bra002183
										BnaA10g16030D	A10	12322348 - 12322637	-59313	upstream	AT2G13820	ATXYP2, XYLOGEN PROTEIN 2, XYP2		0.35	Bifunctional inhibitor/lipid-transfer protein/seed storage 2S albumin superfamily protein; FUNCTIONS IN: lipid binding; INVOLVED IN: lipid transport; LOCATED IN: anchored to plasma membrane, plasma membrane; EXPRESSED IN: 20 plant structures; EXPRESSED DURING: 13 growth stages; CONTAINS InterPro DOMAIN/s: Bifunctional inhibitor/plant lipid transfer protein/seed storage (InterPro:IPR016140), Plant…	-	-	-		https://www.arabidopsis.org/servlets/TairObject?type=locus&name=AT2G13820	http://www.genoscope.cns.fr/brassicanapus/cgi-bin/geneView?src=colza;name=BnaA10g16030D
										BnaA10g16050D	A10	12327758 - 12330928	-51022	upstream	AT3G18040	MAP KINASE 9, MPK9		0.78	Encodes a protein with similarity to MAP kinases (MAPK9).Expressed preferentially in guard cells and appears to be involved in reactive oxygen species mediated ABA signaling	-	-	-		https://www.arabidopsis.org/servlets/TairObject?type=locus&name=AT3G18040	http://www.genoscope.cns.fr/brassicanapus/cgi-bin/geneView?src=colza;name=BnaA10g16050D
										BnaA10g16050D	A10	12327758 - 12330928	-51022	upstream	AT2G42880	ATMPK20, MAP KINASE 20, MPK20		0.69	member of MAP Kinase	-	-	-		https://www.arabidopsis.org/servlets/TairObject?type=locus&name=AT2G42880	http://www.genoscope.cns.fr/brassicanapus/cgi-bin/geneView?src=colza;name=BnaA10g16050D
										BnaA10g16050D	A10	12327758 - 12330928	-51022	upstream	AT1G73670	ATMPK15, MAP KINASE 15, MPK15		0.73	member of MAP Kinase The mRNA is cell-to-cell mobile	-	-	-		https://www.arabidopsis.org/servlets/TairObject?type=locus&name=AT1G73670	http://www.genoscope.cns.fr/brassicanapus/cgi-bin/geneView?src=colza;name=BnaA10g16050D
										BnaA10g16050D	A10	12327758 - 12330928	-51022	upstream	AT3G14720	ARABIDOPSIS THALIANA MAP KINASE 19, ATMPK19, MAP KINASE 19, MPK19		0.67	member of MAP Kinase The mRNA is cell-to-cell mobile	-	-	-		https://www.arabidopsis.org/servlets/TairObject?type=locus&name=AT3G14720	http://www.genoscope.cns.fr/brassicanapus/cgi-bin/geneView?src=colza;name=BnaA10g16050D
										BnaA10g16050D	A10	12327758 - 12330928	-51022	upstream	AT1G18150	ATMPK8, MPK8		0.74	Encodes mitogen-activated protein kinase 8 (MPK8). MPK8 connects protein phosphorylation, Ca2+, and ROS in the wound-signaling pathway.	-	-	-		https://www.arabidopsis.org/servlets/TairObject?type=locus&name=AT1G18150	http://www.genoscope.cns.fr/brassicanapus/cgi-bin/geneView?src=colza;name=BnaA10g16050D
										BnaA10g16050D	A10	12327758 - 12330928	-51022	upstream	AT1G53510	ARABIDOPSIS THALIANA MAP KINASE 18, ATMPK18, MITOGEN-ACTIVATED PROTEIN KINASE 18, MPK18		0.65	member of MAP Kinase	-	-	-		https://www.arabidopsis.org/servlets/TairObject?type=locus&name=AT1G53510	http://www.genoscope.cns.fr/brassicanapus/cgi-bin/geneView?src=colza;name=BnaA10g16050D
										BnaA10g16060D	A10	12330981 - 12333608	-48342	upstream	AT3G06190	ATBPM2, BPM2, BTB-POZ AND MATH DOMAIN 2		0.72	Encodes a member of the MATH-BTB domain proteins (BPMs) that directly interact with and target for proteasomal degradation the class I homeobox-leucine zipper (HD-ZIP) transcription factor ATHB6. Known members include AT5G19000 (BPM1), AT3G06190 (BPM2), AT2G39760 (BPM3), AT3G03740 (BPM4), AT5G21010 (BPM5) and AT3G43700 (BPM6).	-	-	-		https://www.arabidopsis.org/servlets/TairObject?type=locus&name=AT3G06190	http://www.genoscope.cns.fr/brassicanapus/cgi-bin/geneView?src=colza;name=BnaA10g16060D
										BnaA10g16070D	A10	12336835 - 12339708	-42242	upstream	AT3G06210	ARM repeat superfamily protein		0.7	binding; INVOLVED IN: biological_process unknown; LOCATED IN: cellular_component unknown; EXPRESSED IN: 14 plant structures; EXPRESSED DURING: 6 growth stages; CONTAINS InterPro DOMAIN/s: Armadillo-like helical (InterPro:IPR011989), Armadillo (InterPro:IPR000225), Armadillo-type fold (InterPro:IPR016024); BEST Arabidopsis thaliana protein match is: ARM repeat superfamily protein (TAIR:AT5G18980.1)	-	-	-		https://www.arabidopsis.org/servlets/TairObject?type=locus&name=AT3G06210	http://www.genoscope.cns.fr/brassicanapus/cgi-bin/geneView?src=colza;name=BnaA10g16070D
										BnaA10g16070D	A10	12336835 - 12339708	-42242	upstream	AT4G14280	ARM repeat superfamily protein		0.51	binding; INVOLVED IN: biological_process unknown; LOCATED IN: cellular_component unknown; CONTAINS InterPro DOMAIN/s: Armadillo-like helical (InterPro:IPR011989), Armadillo-type fold (InterPro:IPR016024); BEST Arabidopsis thaliana protein match is: ARM repeat superfamily protein (TAIR:AT5G18980.1)	-	-	-		https://www.arabidopsis.org/servlets/TairObject?type=locus&name=AT4G14280	http://www.genoscope.cns.fr/brassicanapus/cgi-bin/geneView?src=colza;name=BnaA10g16070D
										BnaA10g16130D	A10	12365700 - 12366618	-15332	upstream	AT5G18900	2-oxoglutarate (2OG) and Fe(II)-dependent oxygenase superfamily protein		0.86	oxidoreductase activity, acting on paired donors, with incorporation or reduction of molecular oxygen, 2-oxoglutarate as one donor, and incorporation of one atom each of oxygen into both donors, oxidoreductase activity, oxidoreductase activity, acting on paired donors, with incorporation or reduction of molecular oxygen, L-ascorbic acid binding, iron ion binding; INVOLVED IN: oxidation reduction,…	-	-	-		https://www.arabidopsis.org/servlets/TairObject?type=locus&name=AT5G18901	http://www.genoscope.cns.fr/brassicanapus/cgi-bin/geneView?src=colza;name=BnaA10g16130D
										BnaA10g16150D	A10	12368400 - 12374085	-7865	upstream	AT5G18890	NSH4, NUCLEOSIDE HYDROLASE 4		0.76	Inosine-uridine preferring nucleoside hydrolase family protein; CONTAINS InterPro DOMAIN/s: Inosine/uridine-preferring nucleoside hydrolase (InterPro:IPR001910); BEST Arabidopsis thaliana protein match is: inosine-uridine preferring nucleoside hydrolase family protein (TAIR:AT5G18860.1)	-	-	-		https://www.arabidopsis.org/servlets/TairObject?type=locus&name=AT5G18890	http://www.genoscope.cns.fr/brassicanapus/cgi-bin/geneView?src=colza;name=BnaA10g16150D
										BnaA10g16200D	A10	12396217 - 12396860	14218	downstream	AT3G06320	Ribosomal protein L33 family protein		0.98	structural constituent of ribosome; INVOLVED IN: translation; LOCATED IN: ribosome, intracellular, large ribosomal subunit; CONTAINS InterPro DOMAIN/s: Ribosomal protein L33 (InterPro:IPR001705); BEST Arabidopsis thaliana protein match is: Ribosomal protein L33 family protein (TAIR:AT5G18790.1)	-	-	-		https://www.arabidopsis.org/servlets/TairObject?type=locus&name=AT3G06320	http://www.genoscope.cns.fr/brassicanapus/cgi-bin/geneView?src=colza;name=BnaA10g16200D
UQnapus1779			A10; 11966224 - 11966273	Bra008616	A10	11910649 - 11911695	-54529	upstream	A10; 13203273 - 13203322	BnaA10g17950D	A10	13144435 - 13146182	-57091	upstream	AT5G16510	REVERSIBLY GLYCOSYLATED POLYPEPTIDE 5, REVERSIBLY GLYCOSYLATED PROTEIN 5, RGP5; Alpha-1,4-glucan-protein synthase family protein	0.92	0.92	RGP5 is a member of the reversably-glycosylated family of proteins. Analyses using tagged RGP5 suggest that it is present in the cytosol and in association with the Golgi apparatus. Recombinant RGP5 does not have UDP-arabinose mutase activity based on an in vitro assay even though the related RGP1, RGP2, and RGP3 proteins do have activity in the same assay. RGP5 can form complexes with RGP1 and R…	Rautengarten, Carsten, et al.2011; Hajduch, Martin, et al.2010; Wang, Yi, et al.2008; Noir, Sandra, et al. 2005; Dixon, David P., et al.2005	-	-		https://www.arabidopsis.org/servlets/TairObject?type=locus&name=AT5G16510	http://www.genoscope.cns.fr/brassicanapus/cgi-bin/geneView?src=colza;name=BnaA10g17950D		http://brassicadb.org/brad/proteinseq.php?ginput=Bra008616
				Bra008617	A10	11915947 - 11918648	-47576	upstream		BnaA10g17960D	A10	13149724 - 13151916	-51357	upstream	AT5G16500	LIP1, LOST IN POLLEN TUBE GUIDANCE 1; Protein kinase superfamily protein	0.64	0.65	Encodes a receptor-like cytoplasmic kinase localized in the membrane of pollen tube tip regions that controls micropylar pollen tube guidance in Arabidopsis.	Takeuchi, Hidenori, and Tetsuya Higashiyama 2016; Liu, Jingjing, et al. 2013; Wang, Yi, et al.2008; Riley, Michael C., Amanda Clare, and Ross D. King 2007	-	-		https://www.arabidopsis.org/servlets/TairObject?type=locus&name=AT5G16500	http://www.genoscope.cns.fr/brassicanapus/cgi-bin/geneView?src=colza;name=BnaA10g17960D		http://brassicadb.org/brad/proteinseq.php?ginput=Bra008617
				Bra008618	A10	11919418 - 11919675	-46549	upstream						upstream	AT5G54690	GALACTURONOSYLTRANSFERASE 12, GAUT12, IRREGULAR XYLEM 8, IRX8, LGT6	0.88		Encodes a protein with putative galacturonosyltransferase activity. Mutants defective in this gene displayed a notable reduction in xylose (>50%) in the cell walls from stems and roots and a reduction in cellulose (~25%).	-	-	-		https://www.arabidopsis.org/servlets/TairObject?type=locus&name=AT5G54690			http://brassicadb.org/brad/proteinseq.php?ginput=Bra008618
				Bra008619	A10	11924084 - 11924725	-41499	upstream		BnaA10g17970D	A10	13153022 - 13153658	-49615	upstream	AT5G16490	RIC4, ROP-INTERACTIVE CRIB MOTIF-CONTAINING PROTEIN 4	0.55	0.57	encodes a member of a novel protein family that contains contain a CRIB (for Cdc42/Rac-interactive binding) motif required for their specific interaction with GTP-bound Rop1 (plant-specific Rho GTPase). It interacts with Rop1 and is involved in pollen tube growth and function, and exocytosis in the pollen tube tip. Protein most similar to RIC2 (family subgroup V). Gene is expressed in all tissues…	Venus, Yvonne, and Ralf Oelmüller 2013; Nagawa, Shingo, et al. 2012; Oikawa, Ai, et al. 2010; Lee, Yong Jik, et al. 2008; Gu, Ying, et al. 2005; Fu, Ying, et al. 2005; Wu, Guang, et al. 2001	-	-		https://www.arabidopsis.org/servlets/TairObject?type=locus&name=AT5G16490	http://www.genoscope.cns.fr/brassicanapus/cgi-bin/geneView?src=colza;name=BnaA10g17970D		http://brassicadb.org/brad/proteinseq.php?ginput=Bra008619
				Bra008620	A10	11925662 - 11926992	-39232	upstream		BnaA10g17980D	A10	13154451 - 13155894	-47379	upstream	AT5G16480	ATPFA-DSP5, PFA-DSP5, PLANT AND FUNGI ATYPICAL DUAL-SPECIﬁCITY PHOSPHATASE 5; Phosphotyrosine protein phosphatases superfamily protein	0.84	0.84	Encodes an atypical dual-speciﬁcity phosphatase.	Romá-Mateo, Carlos, et al. 2011; Wang, Yi, et al. 2008; Kerk, David, George Templeton, and Greg BG Moorhead 2008; Quettier, Anne‐Laure, et al. 2006; Brenner, Wolfram G., et al. 2005	-	-		https://www.arabidopsis.org/servlets/TairObject?type=locus&name=AT5G16480	http://www.genoscope.cns.fr/brassicanapus/cgi-bin/geneView?src=colza;name=BnaA10g17980D		http://brassicadb.org/brad/proteinseq.php?ginput=Bra008620
				Bra008621	A10	11928028 - 11928339	-37885	upstream		BnaA10g17990D	A10	13156719 - 13157324	-45949	upstream	AT5G16470	MBS2, METHYLENE BLUE SENSITIVITY 2; zinc finger (C2H2 type) family protein	0.95	0.95	zinc finger (C2H2 type) family protein; FUNCTIONS IN: sequence-specific DNA binding transcription factor activity, zinc ion binding, nucleic acid binding; INVOLVED IN: regulation of transcription; LOCATED IN: intracellular; EXPRESSED IN: 24 plant structures; EXPRESSED DURING: 15 growth stages; CONTAINS InterPro DOMAIN/s: Zinc finger, C2H2-like (InterPro:IPR015880); BEST Arabidopsis thaliana prote…	Thieme, Christoph J., et al.2015; Shao, Ning, Guang You Duan, and Ralph Bock 2013; Ascencio-Ibáñez, José Trinidad, et al. 2008; Wang, Yi, et al. 2008; Riechmann J L, Heard J, Martin G, et al. 2000;	-	-		https://www.arabidopsis.org/servlets/TairObject?type=locus&name=AT5G16470	http://www.genoscope.cns.fr/brassicanapus/cgi-bin/geneView?src=colza;name=BnaA10g17990D		http://brassicadb.org/brad/proteinseq.php?ginput=Bra008621
				Bra008622	A10	11930505 - 11931335	-34889	upstream						upstream	AT3G02700	NC domain-containing protein-related	0.54		CONTAINS InterPro DOMAIN/s: NC (InterPro:IPR007053); BEST Arabidopsis thaliana protein match is: NC domain-containing protein-related (TAIR:AT5G16360.1)	-	-	-		https://www.arabidopsis.org/servlets/TairObject?type=locus&name=			http://brassicadb.org/brad/proteinseq.php?ginput=Bra008622
				Bra008623	A10	11932296 - 11933287	-32937	upstream		BnaA10g18000D	A10	13165614 - 13166811	-36462	upstream	AT5G16360	NC domain-containing protein-related	0.61	0.62	NC domain-containing protein-related; CONTAINS InterPro DOMAIN/s: NC (InterPro:IPR007053); BEST Arabidopsis thaliana protein match is: NC domain-containing protein-related (TAIR:AT3G02700.1)	-	-	-		https://www.arabidopsis.org/servlets/TairObject?type=locus&name=AT5G16360	http://www.genoscope.cns.fr/brassicanapus/cgi-bin/geneView?src=colza;name=BnaA10g18000D		http://brassicadb.org/brad/proteinseq.php?ginput=Bra008623
				Bra008624	A10	11933617 - 11934972	-31252	upstream		BnaA10g18010D	A10	13166872 - 13168398	-34875	upstream	AT5G16320	FRIGIDA LIKE 1, FRL1	0.48	0.49	family member of FRI-related genes that is required for the winter-annual habit. Genbank accession BK004884	Ding L, Kim S Y, Michaels S D 2013; Choi, Kyuha, et al.2011; Risk, Joanna M., et al.2010; Elena R et al. 2010; Ascencio-Ibáñez, José Trinidad, et al.2008; Hyun-Ju Hwang, Kyuha Choi, Sanghee Kim, Youngmi Lee, Ilha Lee 2007; Schläppi, Michael R 2006;	-	-		https://www.arabidopsis.org/servlets/TairObject?type=locus&name=AT5G16320	http://www.genoscope.cns.fr/brassicanapus/cgi-bin/geneView?src=colza;name=BnaA10g18010D		http://brassicadb.org/brad/proteinseq.php?ginput=Bra008624
				Bra008625	A10	11935951 - 11939893	-26331	upstream		BnaA10g18020D	A10	13169179 - 13173397	-29876	upstream	AT5G16300	Vps51/Vps67 family (components of vesicular transport) protein	0.82	0.83	intra-Golgi vesicle-mediated transport; Vps51/Vps67 family (components of vesicular transport) protein; CONTAINS InterPro DOMAIN/s: Vps51/Vps67 (InterPro:IPR014812)	Wang Y, Zhang W Z, Song L F, et al. Transcriptome analyses show changes in gene expression to accompany pollen germination and tube growth in Arabidopsis[J]. Plant physiology, 2008, 148(3): 1201-1211.	-	-		https://www.arabidopsis.org/servlets/TairObject?type=locus&name=AT5G16300	http://www.genoscope.cns.fr/brassicanapus/cgi-bin/geneView?src=colza;name=BnaA10g18020D		http://brassicadb.org/brad/proteinseq.php?ginput=Bra008625
				Bra008626	A10	11941674 - 11949096	-17128	upstream		BnaA10g18030D	A10	13176527 - 13184028	-19245	upstream	AT5G16280	Tetratricopeptide repeat (TPR)-like superfamily protein	0.85	0.85	Tetratricopeptide repeat (TPR)-like superfamily protein; INVOLVED IN: biological_process unknown; LOCATED IN: endomembrane system; EXPRESSED IN: 23 plant structures; EXPRESSED DURING: 13 growth stages	Thellmann M, Rybak K, Thiele K, et al 2010; Suh M C, Samuels A L, Jetter R, et al 2005	-	-		https://www.arabidopsis.org/servlets/TairObject?type=locus&name=AT5G16280	http://www.genoscope.cns.fr/brassicanapus/cgi-bin/geneView?src=colza;name=BnaA10g18030D		http://brassicadb.org/brad/proteinseq.php?ginput=Bra008626
				Bra008627	A10	11951283 - 11952950	-13274	upstream		BnaA10g18040D	A10	13185609 - 13187952	-15321	upstream	AT4G11340	Disease resistance protein (TIR-NBS-LRR class) family;	0.5	0.49	Unknown (defense response); transmembrane receptor activity; INVOLVED IN: signal transduction, defense response, innate immune response; LOCATED IN: intrinsic to membrane; EXPRESSED IN: stem; CONTAINS InterPro DOMAIN/s: Toll-Interleukin receptor (InterPro:IPR000157); BEST Arabidopsis thaliana protein match is: Disease resistance protein (TIR-NBS-LRR class) family (TAIR:AT5G45000.1)	Meyers B C, Morgante M, Michelmore R W 2002	-	-		https://www.arabidopsis.org/servlets/TairObject?type=locus&name=AT4G11340	http://www.genoscope.cns.fr/brassicanapus/cgi-bin/geneView?src=colza;name=BnaA10g18040D		http://brassicadb.org/brad/proteinseq.php?ginput=Bra008627
				Bra008628	A10	11955208 - 11960232	-5992	upstream		BnaA10g18050D	A10	13191695 - 13197604	-5669	upstream	AT5G16270	ARABIDOPSIS HOMOLOG OF RAD21 3, ATRAD21.3, SYN4, sister chromatid cohesion 1 protein 4	0.72	0.73	Encodes a SCC1/REC8 ortholog that may be involved in mitosis and may represent a mitotic cohesin. Plays a role in somatic DNA double strand break damage repair. The mRNA is cell-to-cell mobile	-	-	-		https://www.arabidopsis.org/servlets/TairObject?type=locus&name=AT5G16270	http://www.genoscope.cns.fr/brassicanapus/cgi-bin/geneView?src=colza;name=BnaA10g18050D		http://brassicadb.org/brad/proteinseq.php?ginput=Bra008628
				Bra008629	A10	11961344 - 11965085	-1139	upstream		BnaA10g18060D	A10	13197973 - 13202171	-1102	upstream	AT5G16260	EARLY FLOWERING 9, ELF9, RNA binding (RRM/RBD/RNP motifs) family protein	0.74	0.73	Encodes a RNA binding protein ELF9 (EARLY FLOWERING9). Loss of ELF9 function in the Wassilewskija ecotype causes early flowering in short days. ELF9 reduces SOC1 (SUPPRESSOR OF OVEREXPRESSION OF CO1) transcript levels, possibly via nonsense-mediated mRNA decay. The mRNA is cell-to-cell mobile.	-	-	-		https://www.arabidopsis.org/servlets/TairObject?type=locus&name=AT5G16260	http://www.genoscope.cns.fr/brassicanapus/cgi-bin/geneView?src=colza;name=BnaA10g18060D		http://brassicadb.org/brad/proteinseq.php?ginput=Bra008629
				Bra008630	A10	11965682 - 11966233	0	Gene		BnaA10g18070D	A10	13202828 - 13203547	0	Gene	AT5G16250	unknown protein	0.89	0.88	BEST Arabidopsis thaliana protein match is: unknown protein (TAIR:AT3G02640.1)	Renault, Hugues, et al 2013; Ascencio-Ibáñez, José Trinidad, et al 2008	-	-		https://www.arabidopsis.org/servlets/TairObject?type=locus&name=AT5G16250	http://www.genoscope.cns.fr/brassicanapus/cgi-bin/geneView?src=colza;name=BnaA10g18070D		http://brassicadb.org/brad/proteinseq.php?ginput=Bra008630
				Bra008631	A10	11966731 - 11969328	458	downstream		BnaA10g18080D	A10	13203639 - 13206909	317	downstream	AT3G02630	Plant stearoyl-acyl-carrier-protein desaturase family protein; FUNCTIONS IN: acyl-[acyl-carrier-protein] desaturase activity, oxidoreductase activity, transition metal ion binding; INVOLVED	0.85	0.85	acyl-[acyl-carrier-protein] desaturase activity, oxidoreductase activity, transition metal ion binding; INVOLVED IN: oxidation reduction, fatty acid metabolic process, fatty acid biosynthetic process; LOCATED IN: chloroplast, chloroplast stroma; EXPRESSED IN: 22 plant structures; EXPRESSED DURING: 14 growth stages; CONTAINS InterPro DOMAIN/s: Ribonucleotide reductase-related (InterPro:IPR012348),…	-	-	-		https://www.arabidopsis.org/servlets/TairObject?type=locus&name=AT3G02630	http://www.genoscope.cns.fr/brassicanapus/cgi-bin/geneView?src=colza;name=BnaA10g18080D		http://brassicadb.org/brad/proteinseq.php?ginput=Bra008631
				Bra008632	A10	11971030 - 11973756	4757	downstream		BnaA10g18090D	A10	13208577 - 13211394	5255	downstream	AT5G16230	Plant stearoyl-acyl-carrier-protein desaturase family protein; FUNCTIONS IN: acyl-[acyl-carrier-protein] desaturase activity, oxidoreductase activity, transition metal ion binding; INVOLVED	0.85	0.86	acyl-[acyl-carrier-protein] desaturase activity, oxidoreductase activity, transition metal ion binding; INVOLVED IN: oxidation reduction, fatty acid metabolic process, fatty acid biosynthetic process; LOCATED IN: chloroplast; EXPRESSED IN: 9 plant structures; EXPRESSED DURING: M germinated pollen stage, petal differentiation and expansion stage; CONTAINS InterPro DOMAIN/s: Ribonucleotide reductas…	-	-	-		https://www.arabidopsis.org/servlets/TairObject?type=locus&name=AT5G16230	http://www.genoscope.cns.fr/brassicanapus/cgi-bin/geneView?src=colza;name=BnaA10g18090D		http://brassicadb.org/brad/proteinseq.php?ginput=Bra008632
				Bra008633	A10	11977876 - 11979896	11603	downstream		BnaA10g18100D	A10	13215316 - 13217632	11994	downstream	AT5G16220	Octicosapeptide/Phox/Bem1p family protein	0.63	0.62	CONTAINS InterPro DOMAIN/s: Octicosapeptide/Phox/Bem1p (InterPro:IPR000270); BEST Arabidopsis thaliana protein match is: Octicosapeptide/Phox/Bem1p family protein (TAIR:AT2G01190.1)	Hanada, Kousuke, et al 2011; Wang, Yi, et al 2008	-	-		https://www.arabidopsis.org/servlets/TairObject?type=locus&name=AT5G16220	http://www.genoscope.cns.fr/brassicanapus/cgi-bin/geneView?src=colza;name=BnaA10g18100D		http://brassicadb.org/brad/proteinseq.php?ginput=Bra008633
				Bra008634	A10	11980317 - 11981204	14044	downstream						downstream	AT1G61560	ATMLO6, MILDEW RESISTANCE LOCUS O 6, MLO6	?		A member of a large family of seven-transmembrane domain proteins specific to plants, homologs of the barley mildew resistance locus o (MLO) protein. The Arabidopsis genome contains 15 genes encoding MLO proteins, with localization in plasma membrane. Phylogenetic analysis revealed four clades of closely-related AtMLO genes. ATMLO6 belongs to the clade IV, with AtMLO2, AtMLO3 and AtMLO12. The gen…	-	-	-		https://www.arabidopsis.org/servlets/TairObject?type=locus&name=			http://brassicadb.org/brad/proteinseq.php?ginput=Bra008634
				Bra008635	A10	11981668 - 11984237	15395	downstream		BnaA10g18110D	A10	13219439 - 13221006	16117	downstream	AT5G16210	HEAT repeat-containing protein;	0.75	0.77	Transcriptome analyses show changes in gene expression to accompany pollen germination and tube growth in Arabidopsis.	Wang, Yi, et al 2008	-	-		https://www.arabidopsis.org/servlets/TairObject?type=locus&name=AT5G16210	http://www.genoscope.cns.fr/brassicanapus/cgi-bin/geneView?src=colza;name=BnaA10g18110D		http://brassicadb.org/brad/proteinseq.php?ginput=Bra008635
				Bra008636	A10	11985344 - 11985829	19071	downstream		BnaA10g18120D	A10	13222006 - 13222533	18684	downstream	AT5G16200	50S ribosomal protein-related	0.81	0.8	BEST Arabidopsis thaliana protein match is: unknown protein (TAIR:AT1G66890.1)	-	-	-		https://www.arabidopsis.org/servlets/TairObject?type=locus&name=AT5G16200	http://www.genoscope.cns.fr/brassicanapus/cgi-bin/geneView?src=colza;name=BnaA10g18120D		http://brassicadb.org/brad/proteinseq.php?ginput=Bra008636
				Bra008637	A10	11990051 - 11990676	23778	downstream						downstream	AT5G66450	LIPID PHOSPHATE PHOSPHATASE EPSILON 2, LPPEPSILON2	?		Encodes a phosphatidic acid phosphatase that can be detected in chloroplast membrane fractions. This gene (LPPepsilon2) and LPPepsilon1, appear to be less important for diacylglycerol formation in the plastids than LPPgamma	-	-	-		https://www.arabidopsis.org/servlets/TairObject?type=locus&name=			http://brassicadb.org/brad/proteinseq.php?ginput=Bra008637
				Bra008638	A10	11991532 - 11994360	25259	downstream		BnaA10g18130D	A10	13225814 - 13228455	22492	downstream	AT4G13410	ATCSLA15, CELLULOSE SYNTHASE LIKE A15, CSLA15; ATCSLA15, CSLA15, Nucleotide-diphospho-suga rtransferases superfamily protein	0.82	0.84	encodes a gene similar to cellulose synthase	Millar, Katherine DL, and John Z. Kiss 2013; Roberts, Alison W., and John T. Bushoven 2007; Dal Bosco C, Lezhneva L, Biehl A, et al 2003	-	-		https://www.arabidopsis.org/servlets/TairObject?type=locus&name=AT4G13410	http://www.genoscope.cns.fr/brassicanapus/cgi-bin/geneView?src=colza;name=BnaA10g18130D		http://brassicadb.org/brad/proteinseq.php?ginput=Bra008638
				Bra008639	A10	11995318 - 11996915	29045	downstream		BnaA10g18140D	A10	13229134 - 13230735	25812	downstream	AT5G16170	Core-2/I-branching beta-1,6-N-acetylglucosaminyltransferase family protein	0.74	0.74	CONTAINS InterPro DOMAIN/s: Core-2/I-Branching enzyme (InterPro:IPR021141); BEST Arabidopsis thaliana protein match is: Core-2/I-branching beta-1,6-N-acetylglucosaminyltransferase family protein (TAIR:AT5G11730.1)	Rehrauer, Hubert, et al 2010; Dal Bosco, Cristina, et al 2003;	-	-		https://www.arabidopsis.org/servlets/TairObject?type=locus&name=AT5G16170	http://www.genoscope.cns.fr/brassicanapus/cgi-bin/geneView?src=colza;name=BnaA10g18140D		http://brassicadb.org/brad/proteinseq.php?ginput=Bra008639
				Bra008640	A10	11997872 - 12000599	31599	downstream		BnaA10g18150D	A10	13231522 - 13234805	28200	downstream	AT5G16150	GLT1, GLUCOSE TRANSPORTER 1, PGLCT, PLASTIDIC GLC TRANSLOCATOR	0.82	0.81	Encodes a putative plastidic glucose transporter.	-	-	-		https://www.arabidopsis.org/servlets/TairObject?type=locus&name=AT5G16150	http://www.genoscope.cns.fr/brassicanapus/cgi-bin/geneView?src=colza;name=BnaA10g18150D		http://brassicadb.org/brad/proteinseq.php?ginput=Bra008640
				Bra008641	A10	12003029 - 12007156	36756	downstream						downstream	AT4G23160	CRK8, cysteine-rich RLK (RECEPTOR-like protein kinase) 8	0.42		Encodes a cysteine-rich receptor-like protein kinase.	-	-	-		https://www.arabidopsis.org/servlets/TairObject?type=locus&name=			http://brassicadb.org/brad/proteinseq.php?ginput=Bra008641
				Bra008642	A10	12007302 - 12008129	41029	downstream		BnaA10g18160D	A10	13235625 - 13237300	32303	downstream	AT5G16140	Peptidyl-tRNA hydrolase family protein	0.85	0.88	aminoacyl-tRNA hydrolase activity; INVOLVED IN: translation; EXPRESSED IN: 22 plant structures; EXPRESSED DURING: 13 growth stages; CONTAINS InterPro DOMAIN/s: Peptidyl-tRNA hydrolase, conserved site (InterPro:IPR018171), Peptidyl-tRNA hydrolase (InterPro:IPR001328); BEST Arabidopsis thaliana protein match is: Peptidyl-tRNA hydrolase family protein (TAIR:AT5G38290.2)	Ascencio-Ibáñez, José Trinidad, et al 2008	-	-		https://www.arabidopsis.org/servlets/TairObject?type=locus&name=AT5G16140	http://www.genoscope.cns.fr/brassicanapus/cgi-bin/geneView?src=colza;name=BnaA10g18160D		http://brassicadb.org/brad/proteinseq.php?ginput=Bra008642
				Bra008643	A10	12008526 - 12009330	42253	downstream		BnaA10g18170D	A10	13237446 - 13238926	34124	downstream	AT5G16130	Ribosomal protein S7e family protein	0.92	0.92	structural constituent of ribosome; INVOLVED IN: translation; LOCATED IN: cytosolic small ribosomal subunit, cytosolic ribosome, nucleolus, plasma membrane, membrane; EXPRESSED IN: 22 plant structures; EXPRESSED DURING: 14 growth stages; CONTAINS InterPro DOMAIN/s: Ribosomal protein S7e (InterPro:IPR000554); BEST Arabidopsis thaliana protein match is: Ribosomal protein S7e family protein (TAIR:AT…	-	-	-		https://www.arabidopsis.org/servlets/TairObject?type=locus&name=AT5G16130	http://www.genoscope.cns.fr/brassicanapus/cgi-bin/geneView?src=colza;name=BnaA10g18170D		http://brassicadb.org/brad/proteinseq.php?ginput=Bra008643
				Bra008644	A10	12010971 - 12012858	44698	downstream		BnaA10g18180D	A10	13240033 - 13242071	36711	downstream	AT5G16120	MAGL15; alpha/beta-Hydrolases superfamily protein	0.8	0.78	alpha/beta-Hydrolases superfamily protein; CONTAINS InterPro DOMAIN/s: Serine hydrolase (InterPro:IPR005645); BEST Arabidopsis thaliana protein match is: alpha/beta-Hydrolases superfamily protein (TAIR:AT1G77420.1)	-	-	-		https://www.arabidopsis.org/servlets/TairObject?type=locus&name=AT5G16120	http://www.genoscope.cns.fr/brassicanapus/cgi-bin/geneView?src=colza;name=BnaA10g18180D		http://brassicadb.org/brad/proteinseq.php?ginput=Bra008644
				Bra008645	A10	12024149 - 12024829	57876	downstream		BnaA10g18190D	A10	13248972 - 13250817	45650	downstream	AT5G16110	unknown	0.68	0.69	molecular_function unknown; INVOLVED IN: biological_process unknown; LOCATED IN: chloroplast; EXPRESSED IN: 24 plant structures; EXPRESSED DURING: 15 growth stages; BEST Arabidopsis thaliana protein match is: unknown protein (TAIR:AT3G02555.1)	-	-	-		https://www.arabidopsis.org/servlets/TairObject?type=locus&name=AT5G16110	http://www.genoscope.cns.fr/brassicanapus/cgi-bin/geneView?src=colza;name=BnaA10g18190D		http://brassicadb.org/brad/proteinseq.php?ginput=Bra008645
				Bra008646	A10	12026620 - 12028467	60347	downstream		BnaA10g18200D	A10	13252103 - 13254027	48781	downstream	AT5G16100	unknown	0.4	0.41	unknown	Wang, Yi, et al 2008; Jakobsen, Mia Kyed, et al 2005	-	-		https://www.arabidopsis.org/servlets/TairObject?type=locus&name=AT5G16100	http://www.genoscope.cns.fr/brassicanapus/cgi-bin/geneView?src=colza;name=BnaA10g18200D		http://brassicadb.org/brad/proteinseq.php?ginput=Bra008646
				Bra008647	A10	12029040 - 12031146	62767	downstream		BnaA10g18210D	A10	13254600 - 13256706	51278	downstream	AT5G38470	RAD23D, Rad23 UV excision repair protein family; RADIATION SENSITIVE23D	0.3	0.3	Encodes a member of the RADIATION SENSITIVE23 (RAD23) family: AT1G16190(RAD23A), AT1G79650(RAD23B), AT3G02540(RAD23C), AT5G38470(RAD23D). RAD23 proteins play an essential role in the cell cycle, morphology, and fertility of plants through their delivery of UPS (ubiquitin/26S proteasome system) substrates to the 26S proteasome.	-	-	-		https://www.arabidopsis.org/servlets/TairObject?type=locus&name=AT5G38470	http://www.genoscope.cns.fr/brassicanapus/cgi-bin/geneView?src=colza;name=BnaA10g18210D		http://brassicadb.org/brad/proteinseq.php?ginput=Bra008647
				Bra008648	A10	12032039 - 12037221	65766	downstream		BnaA10g18220D	A10	13257358 - 13262784	54036	downstream	AT3G02540	RAD23D, Rad23 UV excision repair protein family; PUTATIVE DNA REPAIR PROTEIN RAD23-3, RAD23-3, RAD23C, RADIATION SENSITIVE23C	0.33	0.34	damaged DNA binding, proteasome binding, ubiquitin binding (nucleotide-excision repair, proteasome-mediated ubiquitin-dependent protein catabolic process, response to cold); Encodes a member of the RADIATION SENSITIVE23 (RAD23) family: AT1G16190(RAD23A), AT1G79650(RAD23B), AT3G02540(RAD23C), AT5G38470(RAD23D). RAD23 proteins play an essential role in the cell cycle, morphology, and fertility of p…	-	-	-		https://www.arabidopsis.org/servlets/TairObject?type=locus&name=AT5G38470	http://www.genoscope.cns.fr/brassicanapus/cgi-bin/geneView?src=colza;name=BnaA10g18220D		http://brassicadb.org/brad/proteinseq.php?ginput=Bra008648
				Bra008649	A10	12037893 - 12040105	71620	downstream						downstream	AT1G79650	RAD23, RAD23B, Rad23 UV excision repair protein family; ARABIDOPSIS THALIANA ALDEHYDE OXIDASE 1, ATAO1, RAD23B, RADIATION SENSITIVE23B	0.31		damaged DNA binding, proteasome binding, ubiquitin binding (base-excision repair, nucleotide-excision repair, proteasome-mediated ubiquitin-dependent protein catabolic process); Encodes a member of the RADIATION SENSITIVE23 (RAD23) family: AT1G16190(RAD23A), AT1G79650(RAD23B), AT3G02540(RAD23C), AT5G38470(RAD23D). RAD23 proteins play an essential role in the cell cycle, morphology, and fertility …	-	-	-					http://brassicadb.org/brad/proteinseq.php?ginput=Bra008649
										BnaA10g17940D	A10	13138164 - 13140165	-63108	downstream	AT5G16530	PIN-FORMED 5, PIN5		0.86	Encodes PIN5, an atypical member of the PIN family. PIN5 is a functional auxin transporter that is required for auxin-mediated development. PIN5 does not have a direct role in cell-to-cell transport but regulates intracellular auxin homeostasis and metabolism. PIN5 localizes, unlike other characterized plasma membrane PIN proteins, to endoplasmic reticulum (ER), presumably mediating auxin flow fr…	Verna, Carla, et al 2015; Ganguly, Anindya, et al 2014; Nisar, Nazia, et al. 2014; Sawchuk, Megan G., and Enrico Scarpella 2013; Chen, Yani, et al. 2014; Ding, Zhaojun, et al.2012; Dal Bosco, Cristina, Alexander Dovzhenko, and Klaus Palme. 2012; Bosco, Cristina Dal, et al. 2012; Ganguly, Anindya, et al. 2010; Wang, Ji-Rong, et al. 2009;Mravec, Jozef, et al. 2009; Lazar, Gabor, and Howard M. Goodm…	-	-		https://www.arabidopsis.org/servlets/TairObject?type=locus&name=AT5G16530	http://www.genoscope.cns.fr/brassicanapus/cgi-bin/geneView?src=colza;name=BnaA10g17940D
										BnaA10g18080D	A10	13203639 - 13206909	317	downstream	AT5G16240	Plant stearoyl-acyl-carrier-protein desaturase family protein; FUNCTIONS IN: acyl-[acyl-carrier-protein] desaturase activity, oxidoreductase activity, transition metal ion binding; INVOLVED		0.85	acyl-[acyl-carrier-protein] desaturase activity, oxidoreductase activity, transition metal ion binding; INVOLVED IN: oxidation reduction, fatty acid metabolic process, fatty acid biosynthetic process; EXPRESSED IN: 23 plant structures; EXPRESSED DURING: 13 growth stages; CONTAINS InterPro DOMAIN/s: Ribonucleotide reductase-related (InterPro:IPR012348), Ferritin/ribonucleotide reductase-like (Inte…	-	-	-		https://www.arabidopsis.org/servlets/TairObject?type=locus&name=AT5G16240	http://www.genoscope.cns.fr/brassicanapus/cgi-bin/geneView?src=colza;name=BnaA10g18080D
										BnaA10g18090D	A10	13208577 - 13211394	5255	downstream	AT3G02610	Plant stearoyl-acyl-carrier-protein desaturase family protein; FUNCTIONS IN: acyl-[acyl-carrier-protein] desaturase activity, oxidoreductase activity, transition metal ion binding; INVOLVED		0.83	acyl-[acyl-carrier-protein] desaturase activity, oxidoreductase activity, transition metal ion binding; INVOLVED IN: oxidation reduction, fatty acid metabolic process, fatty acid biosynthetic process; LOCATED IN: chloroplast; CONTAINS InterPro DOMAIN/s: Ribonucleotide reductase-related (InterPro:IPR012348), Fatty acid desaturase, type 2 (InterPro:IPR005067), Ferritin/ribonucleotide reductase-like…	-	-	-		https://www.arabidopsis.org/servlets/TairObject?type=locus&name=AT3G02610	http://www.genoscope.cns.fr/brassicanapus/cgi-bin/geneView?src=colza;name=BnaA10g18090D
										BnaA10g18090D	A10	13208577 - 13211394	5255	downstream	AT3G02620	Plant stearoyl-acyl-carrier-protein desaturase family protein		0.8	acyl-[acyl-carrier-protein] desaturase activity, oxidoreductase activity, transition metal ion binding; INVOLVED IN: oxidation reduction, fatty acid metabolic process, fatty acid biosynthetic process; CONTAINS InterPro DOMAIN/s: Ribonucleotide reductase-related (InterPro:IPR012348), Fatty acid desaturase, type 2 (InterPro:IPR005067), Ferritin/ribonucleotide reductase-like (InterPro:IPR009078); BE…	-	-	-		https://www.arabidopsis.org/servlets/TairObject?type=locus&name=AT3G02620	http://www.genoscope.cns.fr/brassicanapus/cgi-bin/geneView?src=colza;name=BnaA10g18090D
										BnaA10g18130D	A10	13225814 - 13228455	22492	downstream	AT5G16190	ARABIDOPSIS THALIANA CELLULOSE SYNTHASE LIKE A11, ATCSLA11, CELLULOSE SYNTHASE LIKE A11, CSLA11		0.91	encodes a gene similar to cellulose synthase	Roberts, Alison W., and John T. Bushoven 2007	-	-		https://www.arabidopsis.org/servlets/TairObject?type=locus&name=AT5G16190	http://www.genoscope.cns.fr/brassicanapus/cgi-bin/geneView?src=colza;name=BnaA10g18130D
										BnaA10g18130D	A10	13225814 - 13228455	22492	downstream	AT1G24070	ATCSLA10, CELLULOSE SYNTHASE LIKE A10, CELLULOSE SYNTHASE-LIKE A10, CSLA10		0.82	encodes a gene similar to cellulose synthase	Hanada, Kousuke, et al 2011; Sottosanto, Jordan B., Yehoshua Saranga, and Eduardo Blumwald 2007; Roberts, Alison W., and John T. Bushoven 2007	-	-		https://www.arabidopsis.org/servlets/TairObject?type=locus&name=AT1G24070	http://www.genoscope.cns.fr/brassicanapus/cgi-bin/geneView?src=colza;name=BnaA10g18130D
										BnaA10g18130D	A10	13225814 - 13228455	22492	downstream	AT1G23480	ATCSLA03, ATCSLA3, CELLULOSE SYNTHASE-LIKE A3, CSLA03, CSLA3		0.7	encodes a gene similar to cellulose synthase	Hanada, Kousuke, et al 2011; Goubet, Florence, et al 2009; Li, Jigang, et al 2006; Roberts, Alison W., and John T. Bushoven 2007	-	-		https://www.arabidopsis.org/servlets/TairObject?type=locus&name=AT1G23480	http://www.genoscope.cns.fr/brassicanapus/cgi-bin/geneView?src=colza;name=BnaA10g18130D
										BnaA10g18130D	A10	13225814 - 13228455	22492	downstream	AT5G03760.1	ATCSLA09, ATCSLA9, CELLULOSE SYNTHASE LIKE A9, CSLA09, CSLA9, RAT4, RESISTANT TO AGROBACTERIUM TRANSFORMATION 4		0.65	encodes a beta-mannan synthase that is required for agrobacterium-mediated plant genetic transformation involves a complex interaction between the bacterium and the host plant. 3' UTR is involved in transcriptional regulation and the gene is expressed in the elongation zone of the root.	-	-	-		https://www.arabidopsis.org/servlets/TairObject?type=locus&name=AT5G03760	http://www.genoscope.cns.fr/brassicanapus/cgi-bin/geneView?src=colza;name=BnaA10g18130D
										BnaA10g18130D	A10	13225814 - 13228455	22492	downstream	AT4G16590	ATCSLA01, ATCSLA1, CELLULOSE SYNTHASE-LIKE A01, CELLULOSE SYNTHASE-LIKE A1, CSLA01		0.75	encodes a gene similar to cellulose synthase	-	-	-		https://www.arabidopsis.org/servlets/TairObject?type=locus&name=AT4G16590	http://www.genoscope.cns.fr/brassicanapus/cgi-bin/geneView?src=colza;name=BnaA10g18130D
										BnaA10g18230D	A10	13263290 - 13265960	59968	downstream	AT1G79650	ARABIDOPSIS THALIANA ALDEHYDE OXIDASE 1, ATAO1, RAD23B, RADIATION SENSITIVE23B		0.32	Encodes a member of the RADIATION SENSITIVE23 (RAD23) family: AT1G16190(RAD23A), AT1G79650(RAD23B), AT3G02540(RAD23C), AT5G38470(RAD23D). RAD23 proteins play an essential role in the cell cycle, morphology, and fertility of plants through their delivery of UPS (ubiquitin/26S proteasome system) substrates to the 26S proteasome.		-	-		https://www.arabidopsis.org/servlets/TairObject?type=locus&name=AT1G79650	http://www.genoscope.cns.fr/brassicanapus/cgi-bin/geneView?src=colza;name=BnaA10g18230D
